# Supplementary material for: MW-Promoted Cu(I)-Catalyzed P–C Coupling Reactions without the Addition of Conventional Ligands; an Experimental and a Theoretical Study
Source: MDPI journal article supplement (doi:10.3390/catal11080933), 2021-07-30
Supplement: s1 [file s1]

## Supporting Information

# MW-Promoted Cu(I)-Catalyzed P–C Coupling Reactions without the Addition of Conventional Ligands; An Experimental and A Theoretical Study

Bianka Huszár, Réka Henyecz, Zoltán Mucsi and György Keglevich \*

Department of Organic Chemistry and Technology, Budapest University of Technology and Economics, 1521 Budapest, Hungary; huszar.bianka@vbk.bme.hu (B.H.); reka422@gmail.com (R.H.); zoltanmucsi@gmail.com (Z.M.)

\* Correspondence: keglevich.gyorgy@vbk.bme.hu; Tel.: +36-1-463-1111 (ext. 5883)

### Table of contents

- |                                                                     |            |
|---------------------------------------------------------------------|------------|
| 1. NMR spectra for compounds <b>1–3</b>                             | pg. 1–9.   |
| 2. Table S1–S7 containing the computed row data                     | pg. 10–14. |
| 3. Additional Tables containing XYZ coordinates of computed species | pg. 15–82. |

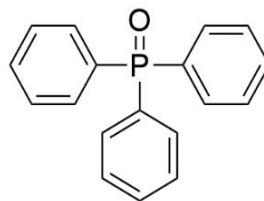

Triphenylphosphine oxide (**1**)

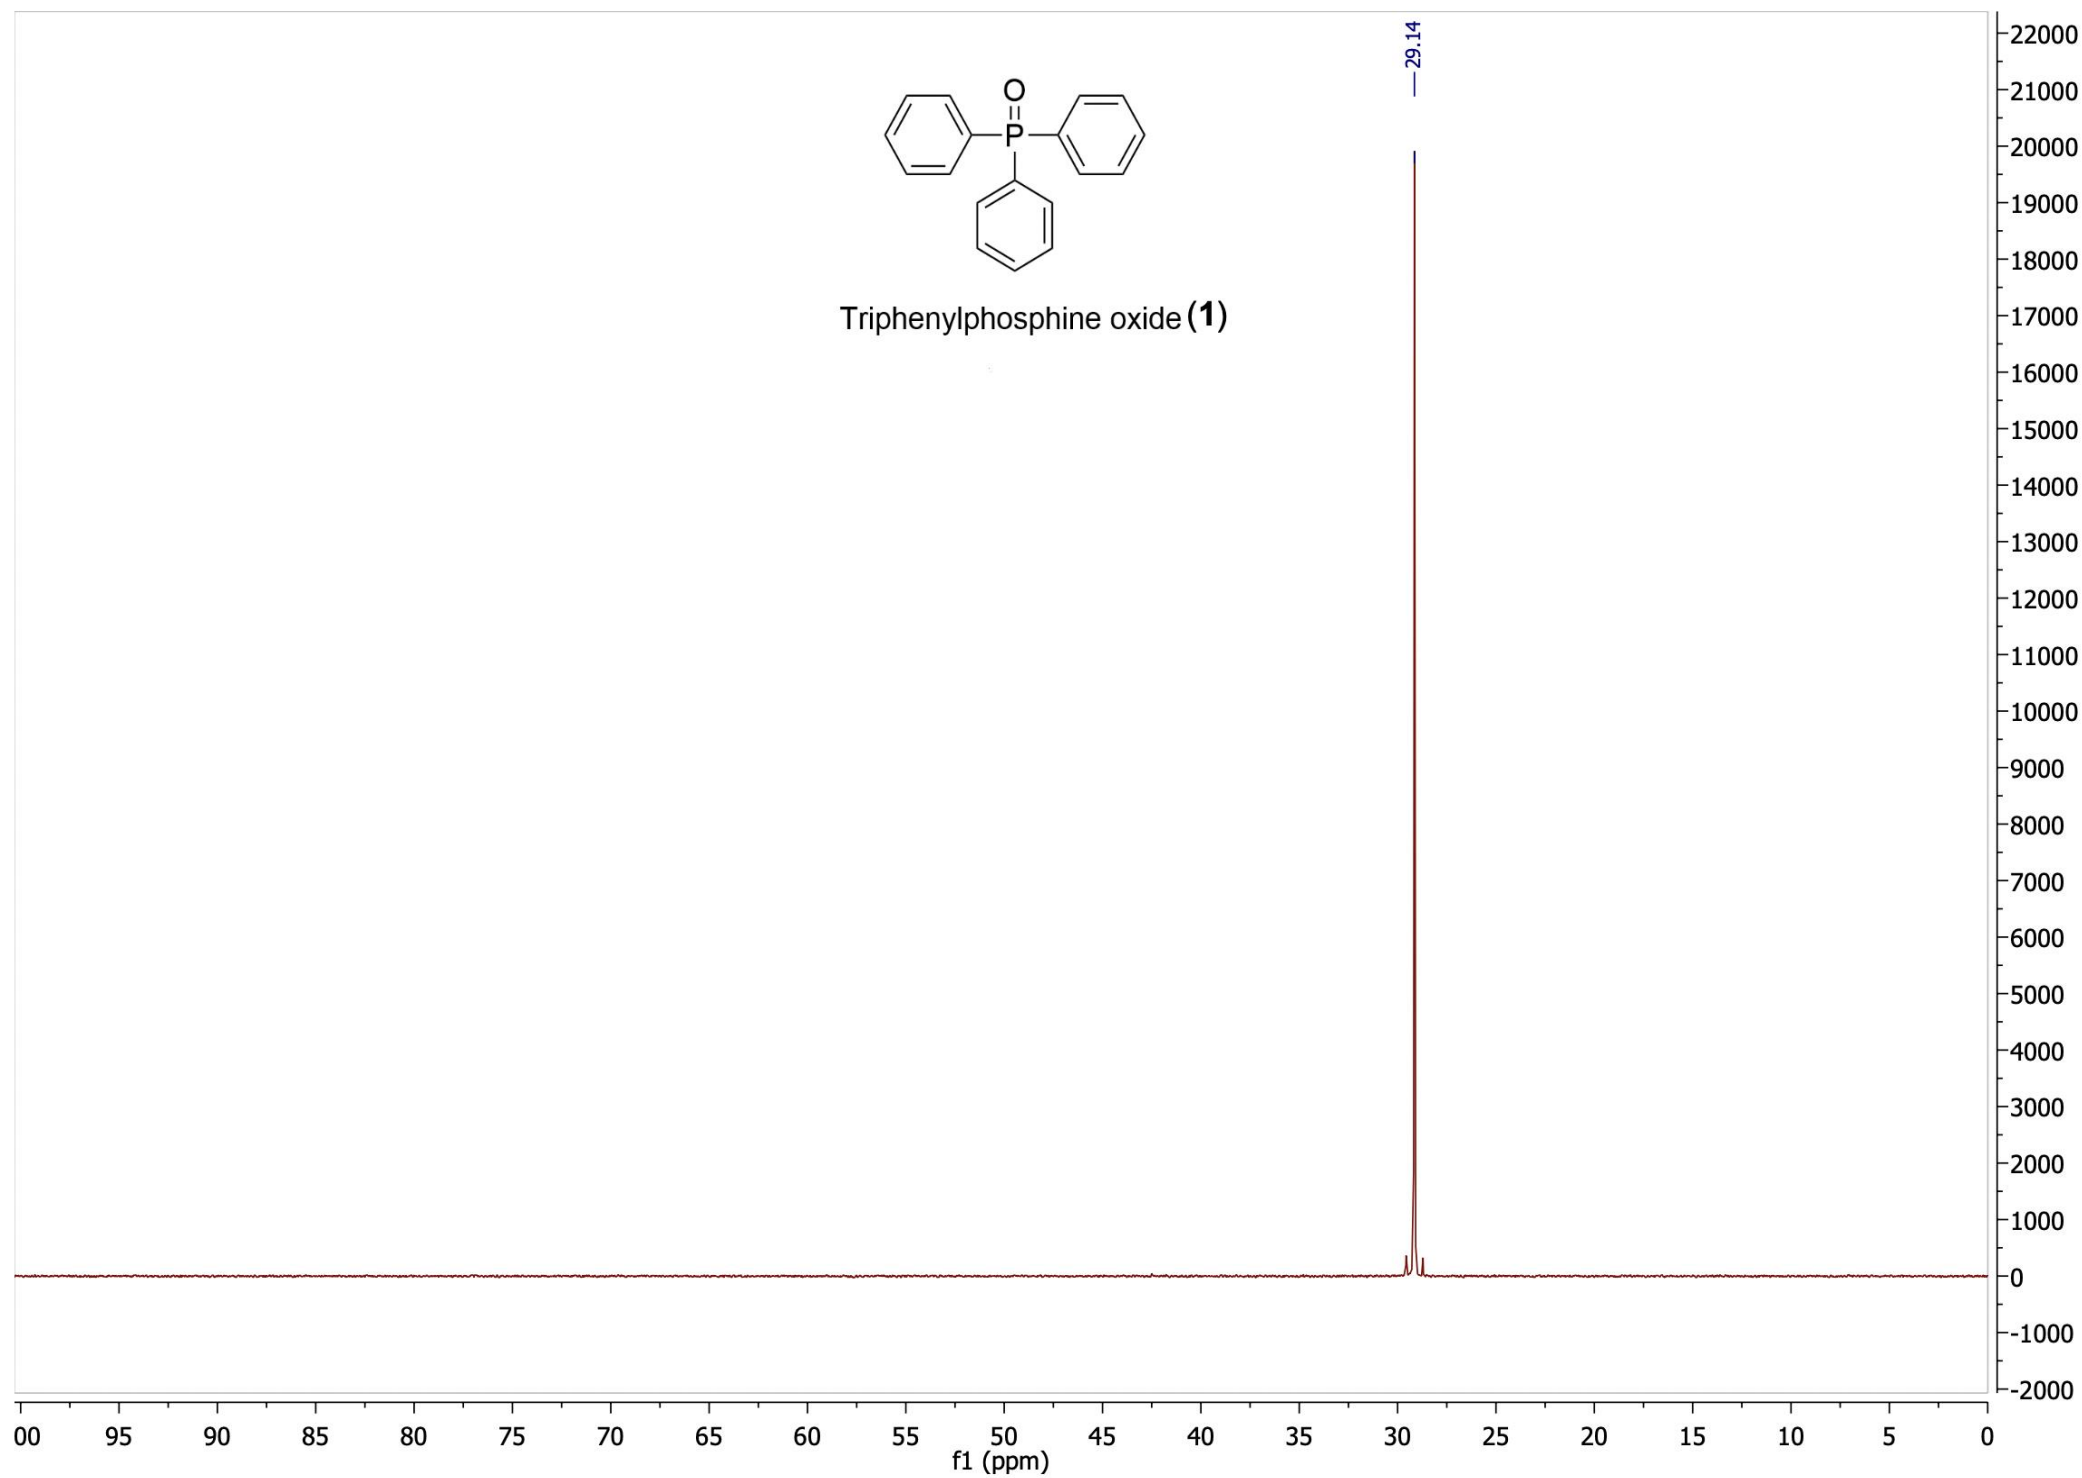

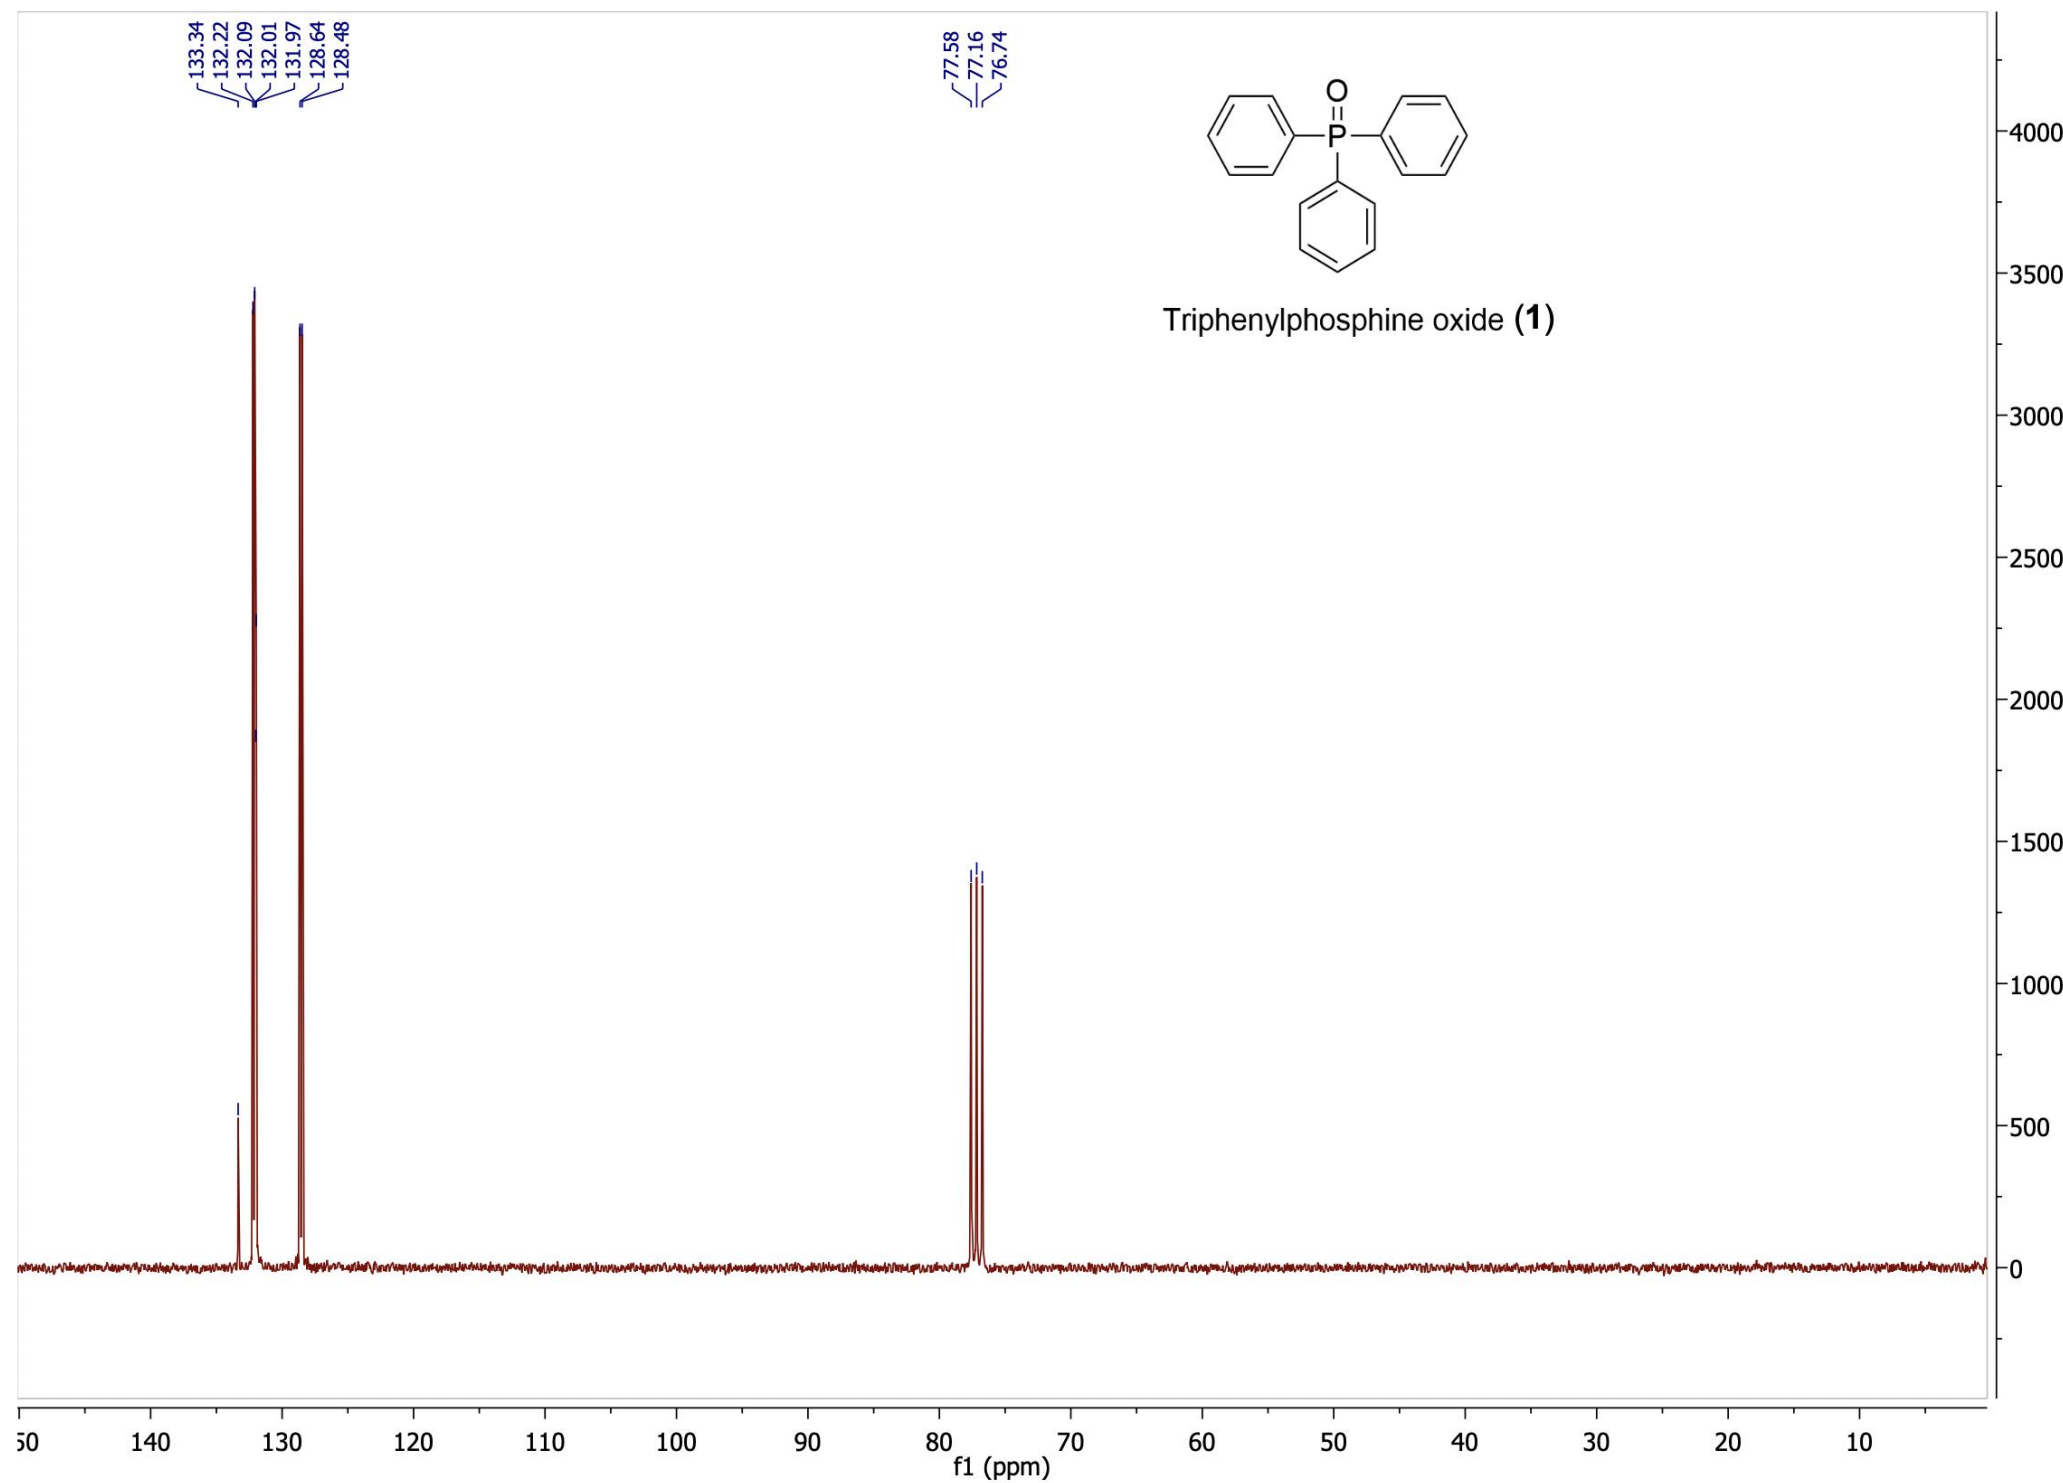

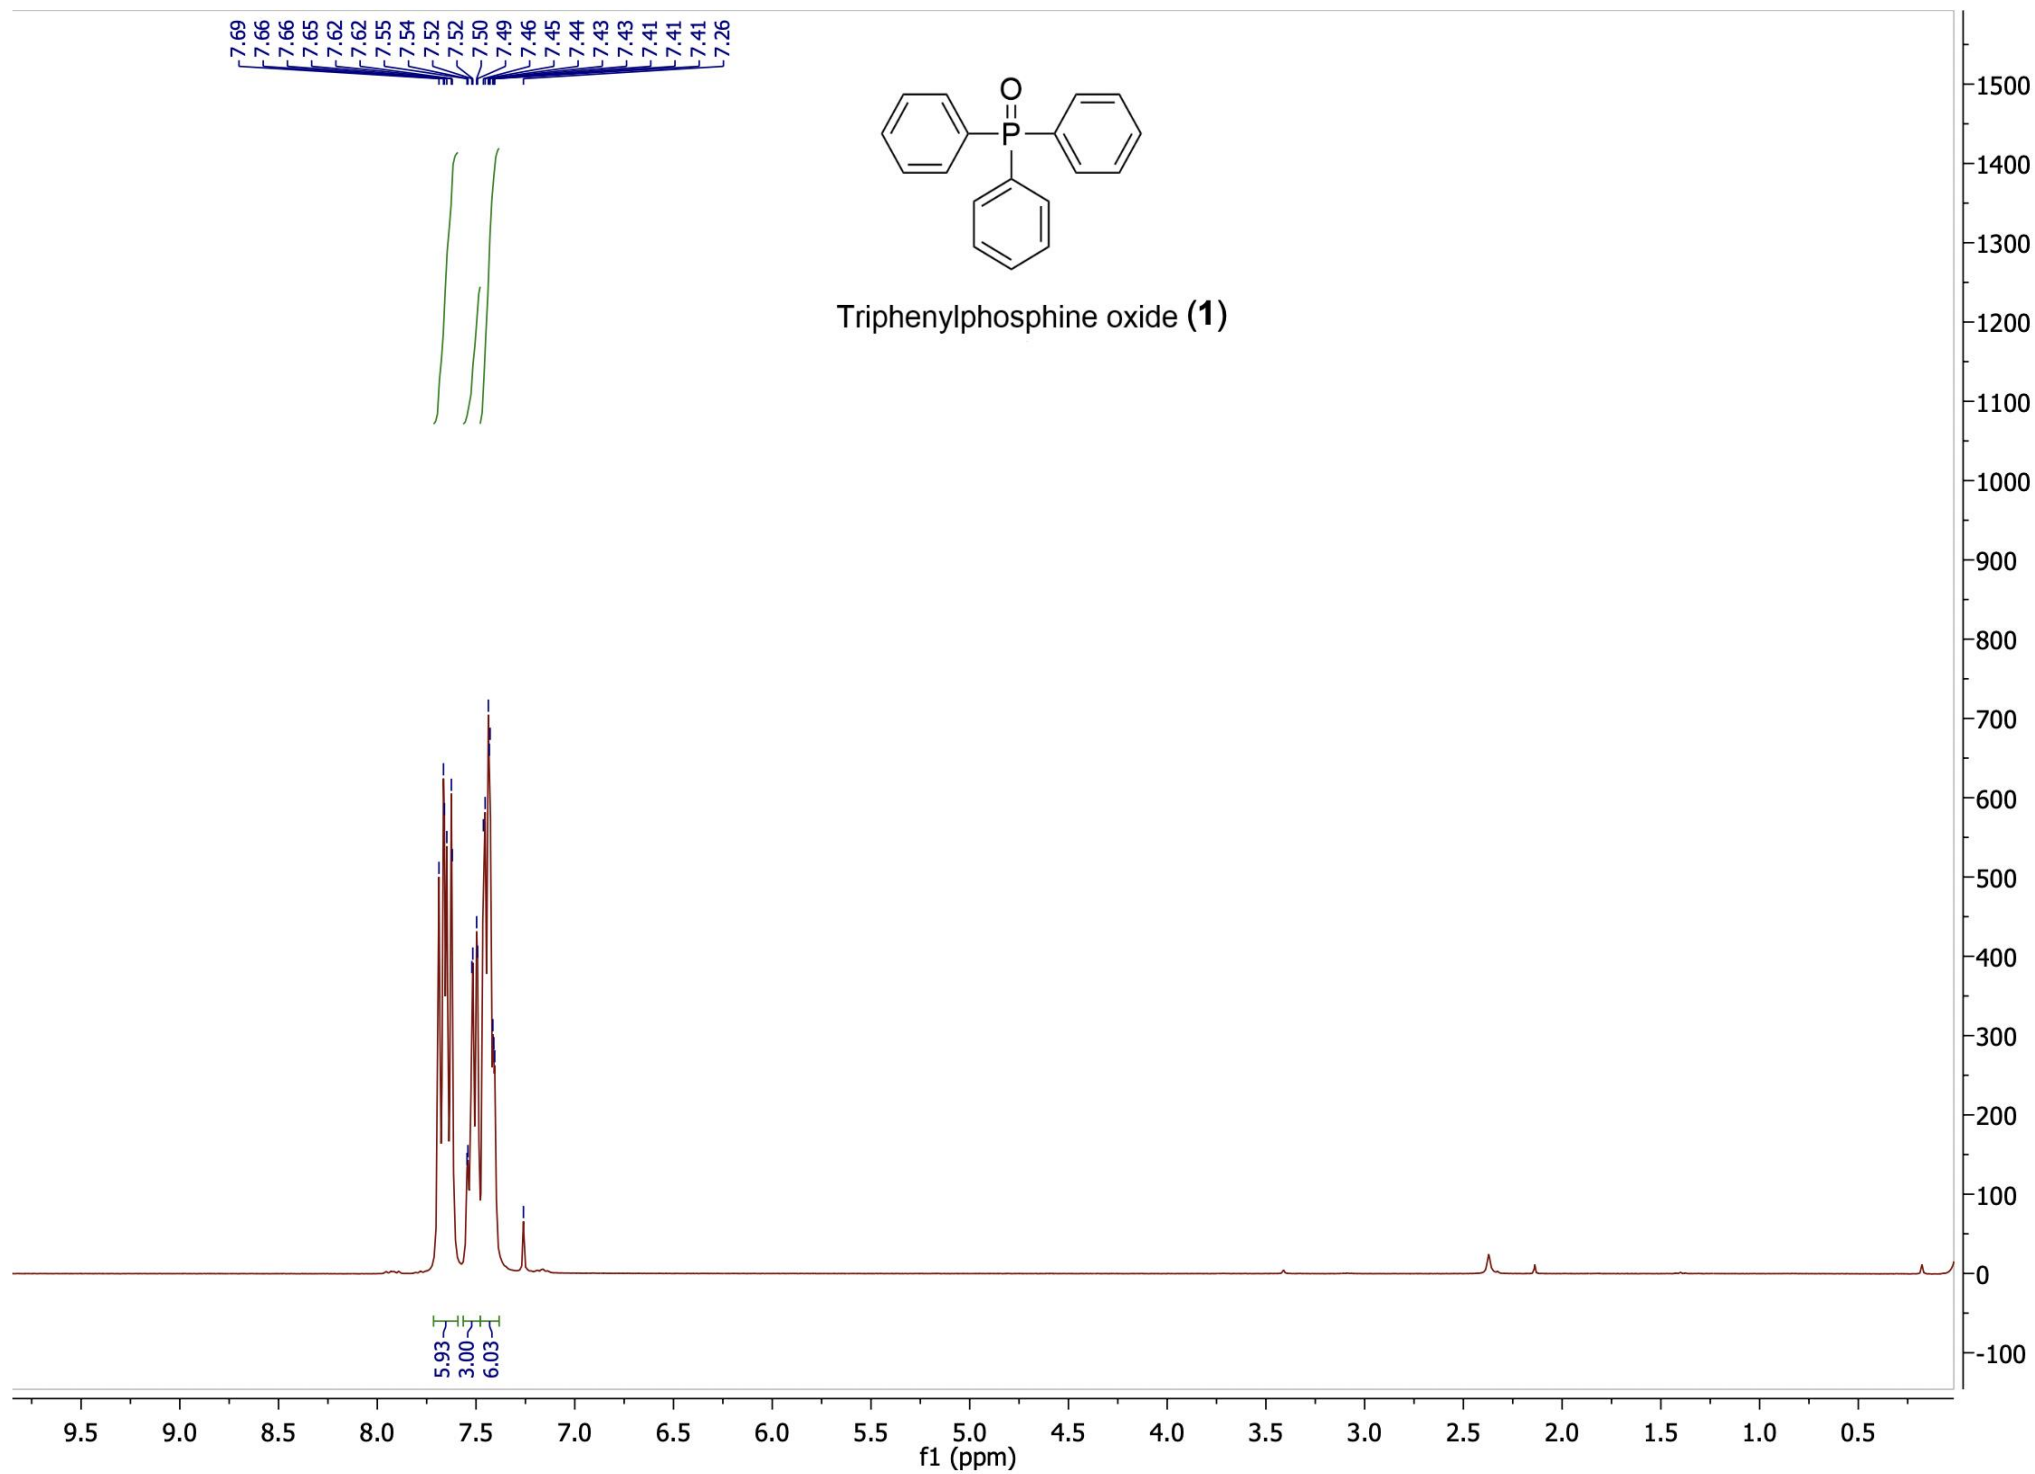

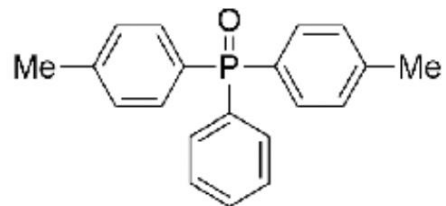

Bis(4-methylphenyl)phenylphosphine oxide (**2**)

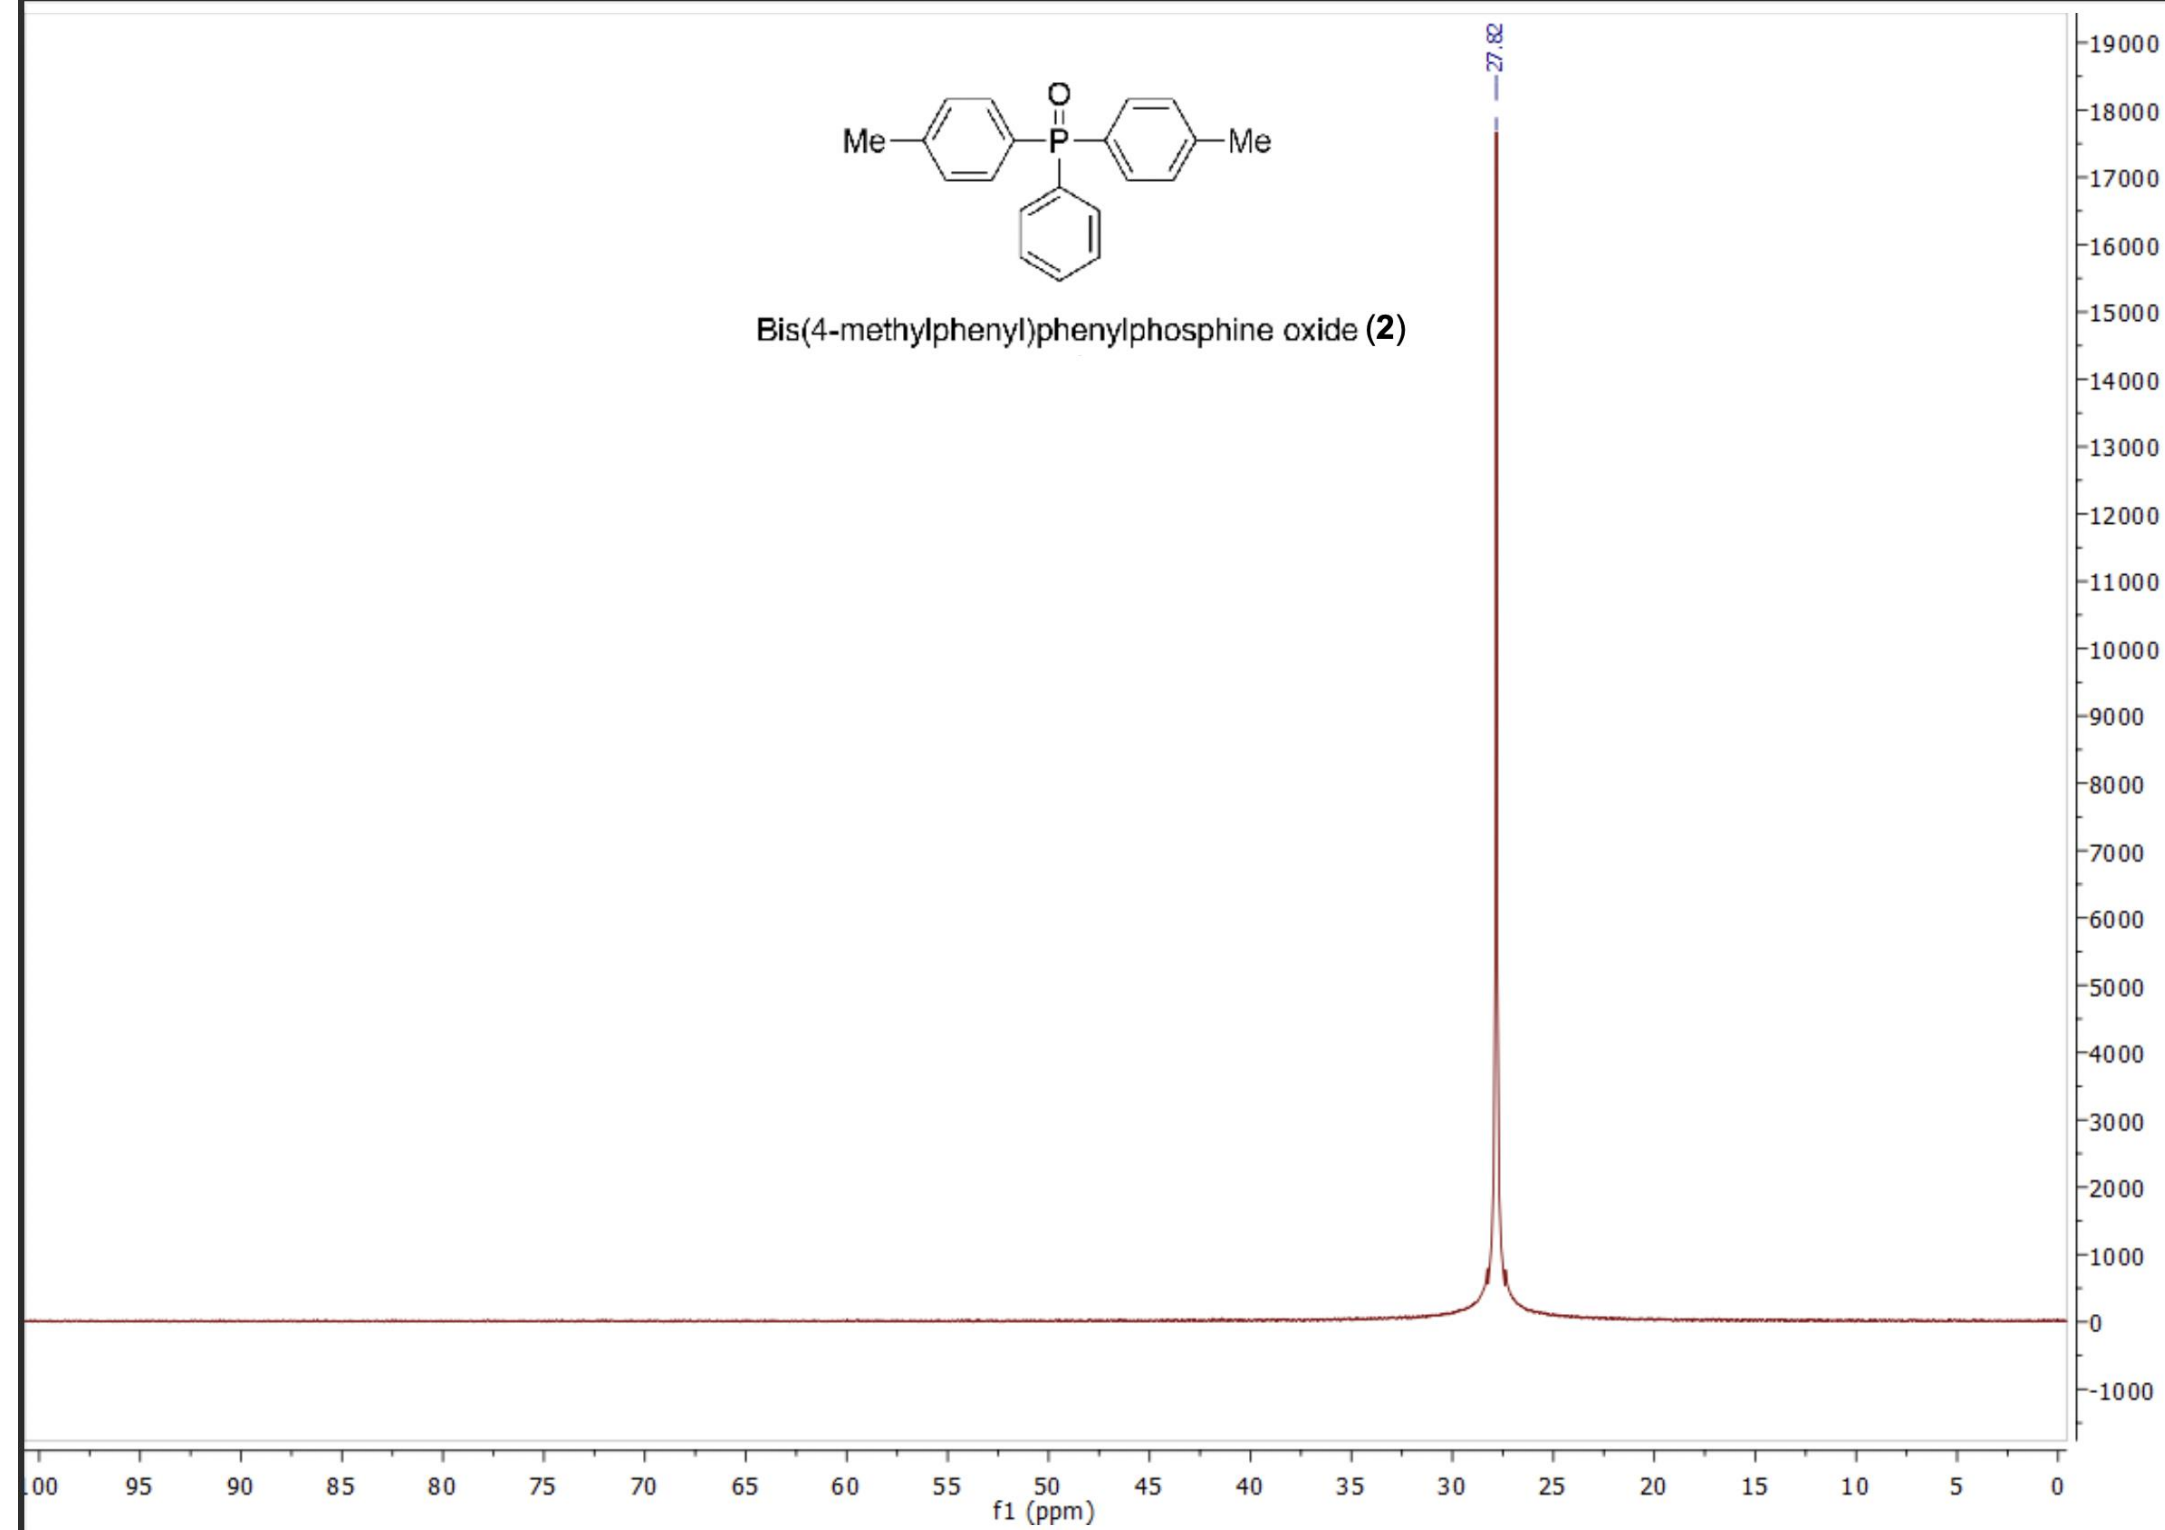

142.42  
142.38  
133.74  
132.36  
132.20  
132.13  
132.06  
132.00  
131.81  
131.77  
130.10  
129.35  
129.18  
128.69  
128.53  
128.37

77.58  
77.16  
76.74

21.65

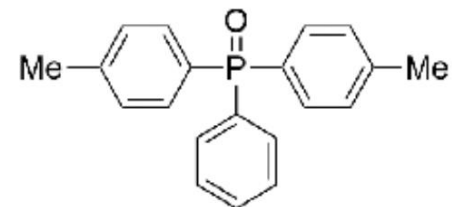

Bis(4-methylphenyl)phenylphosphine oxide (**2**)

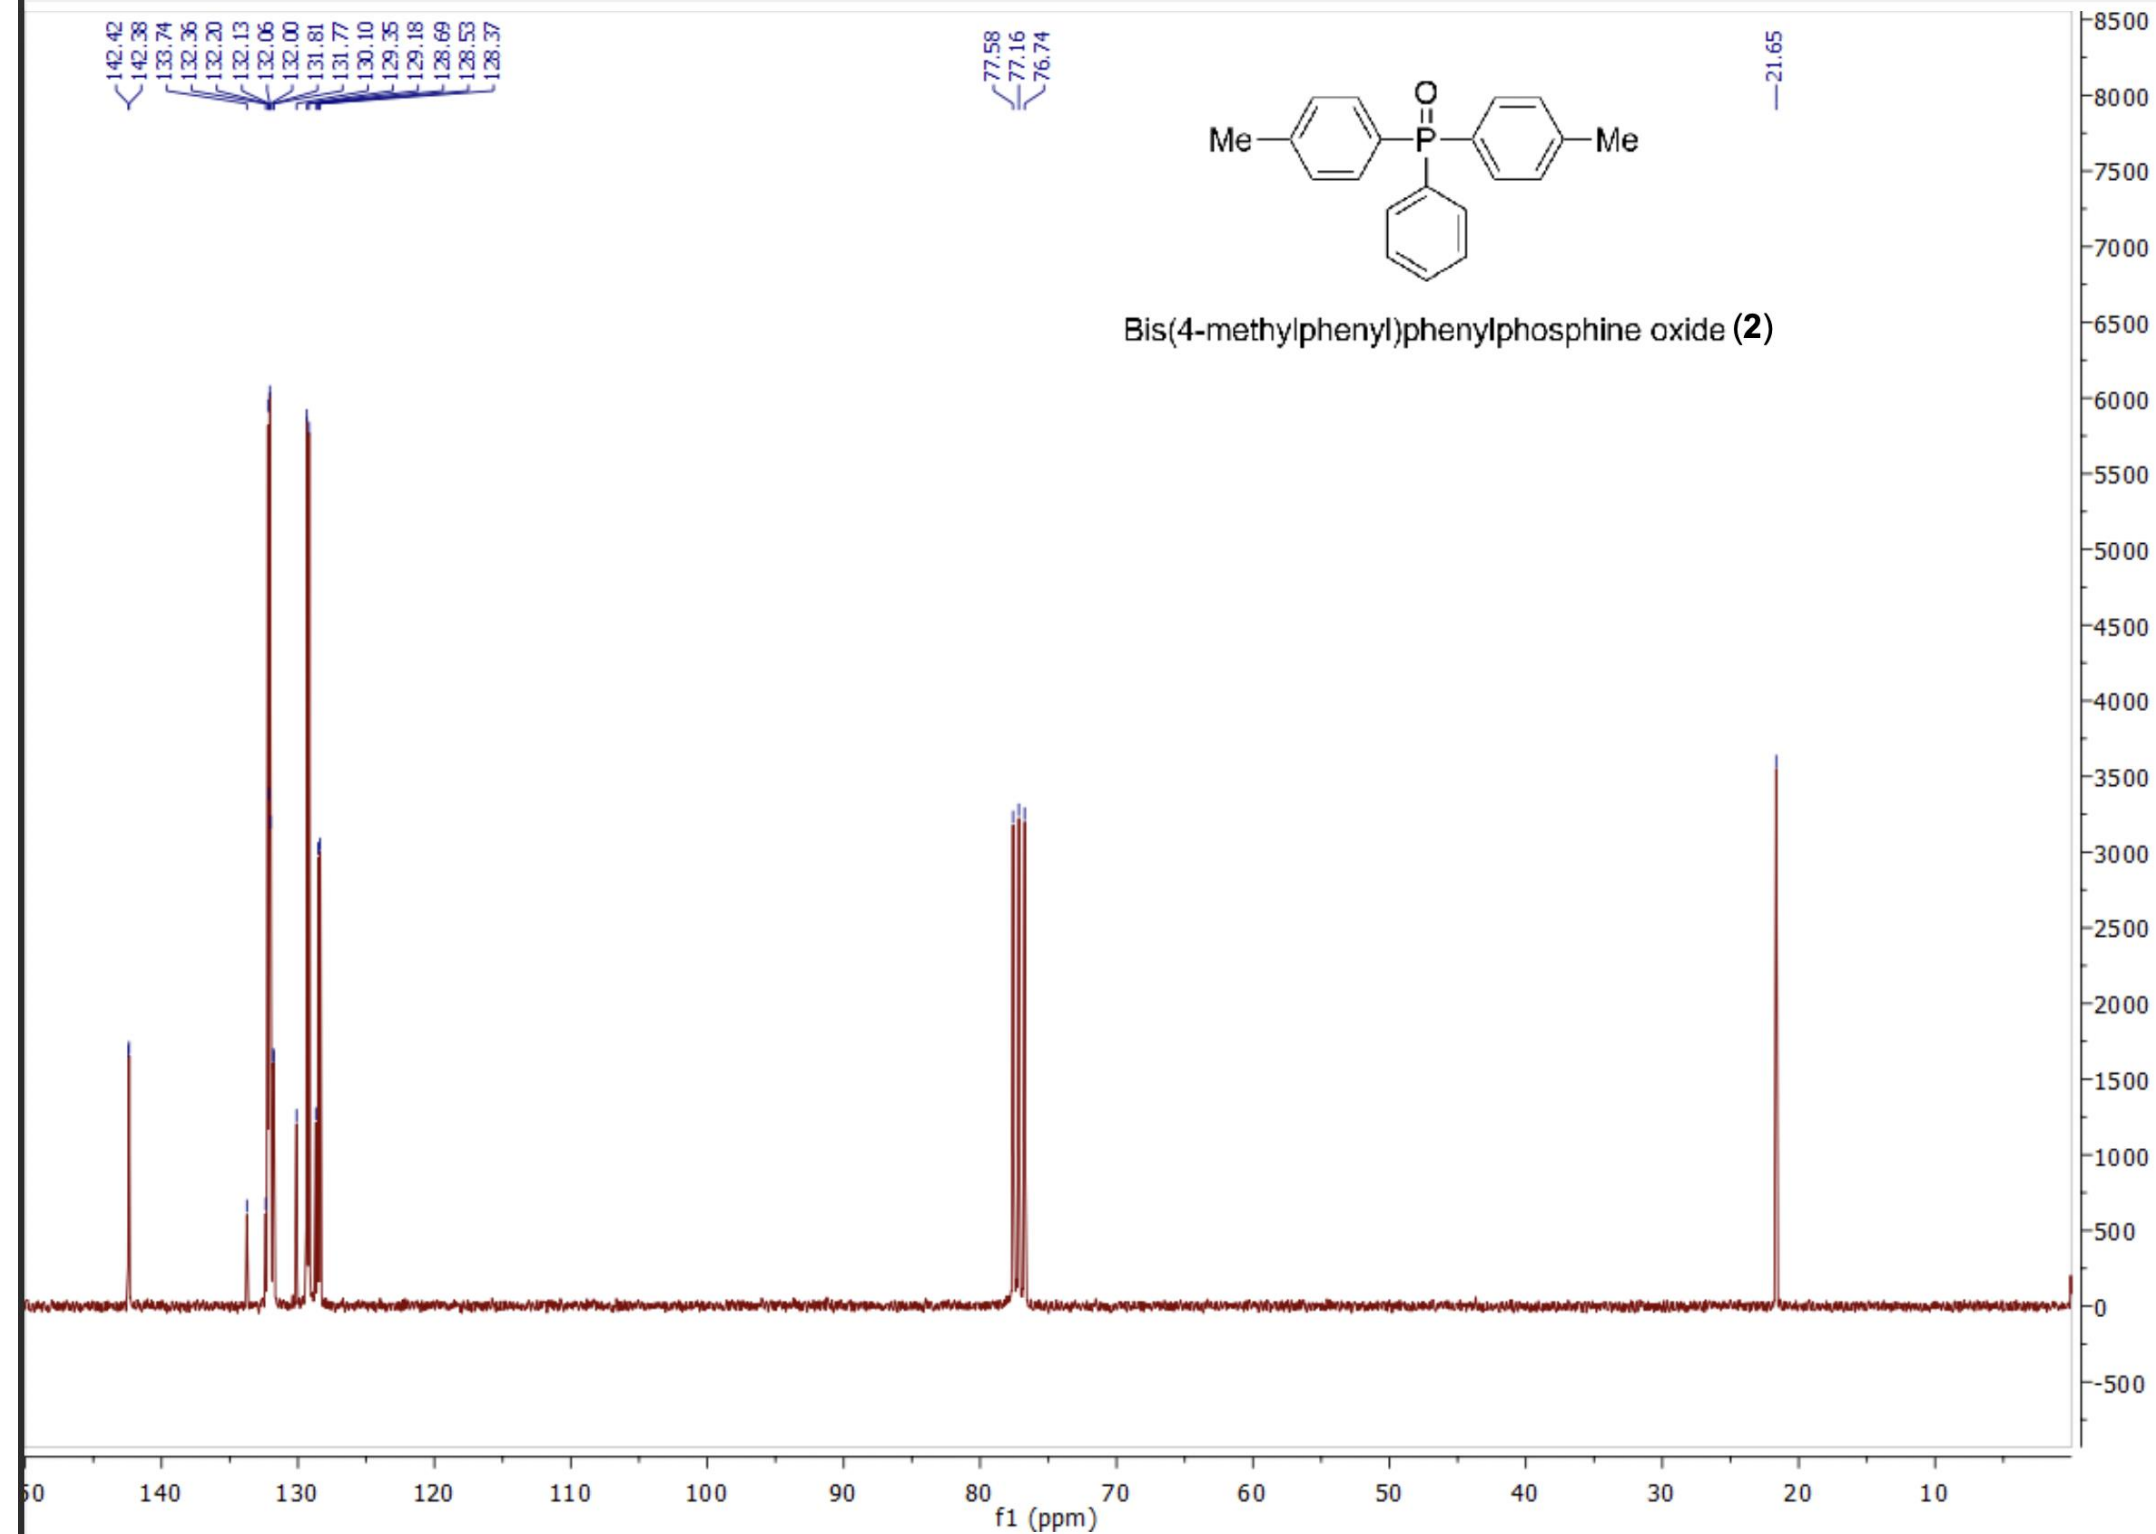

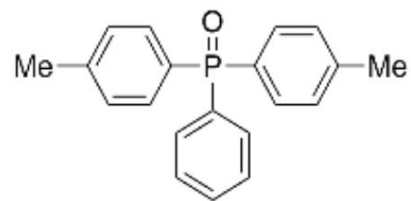

Bis(4-methylphenyl)phenylphosphine oxide (**2**)

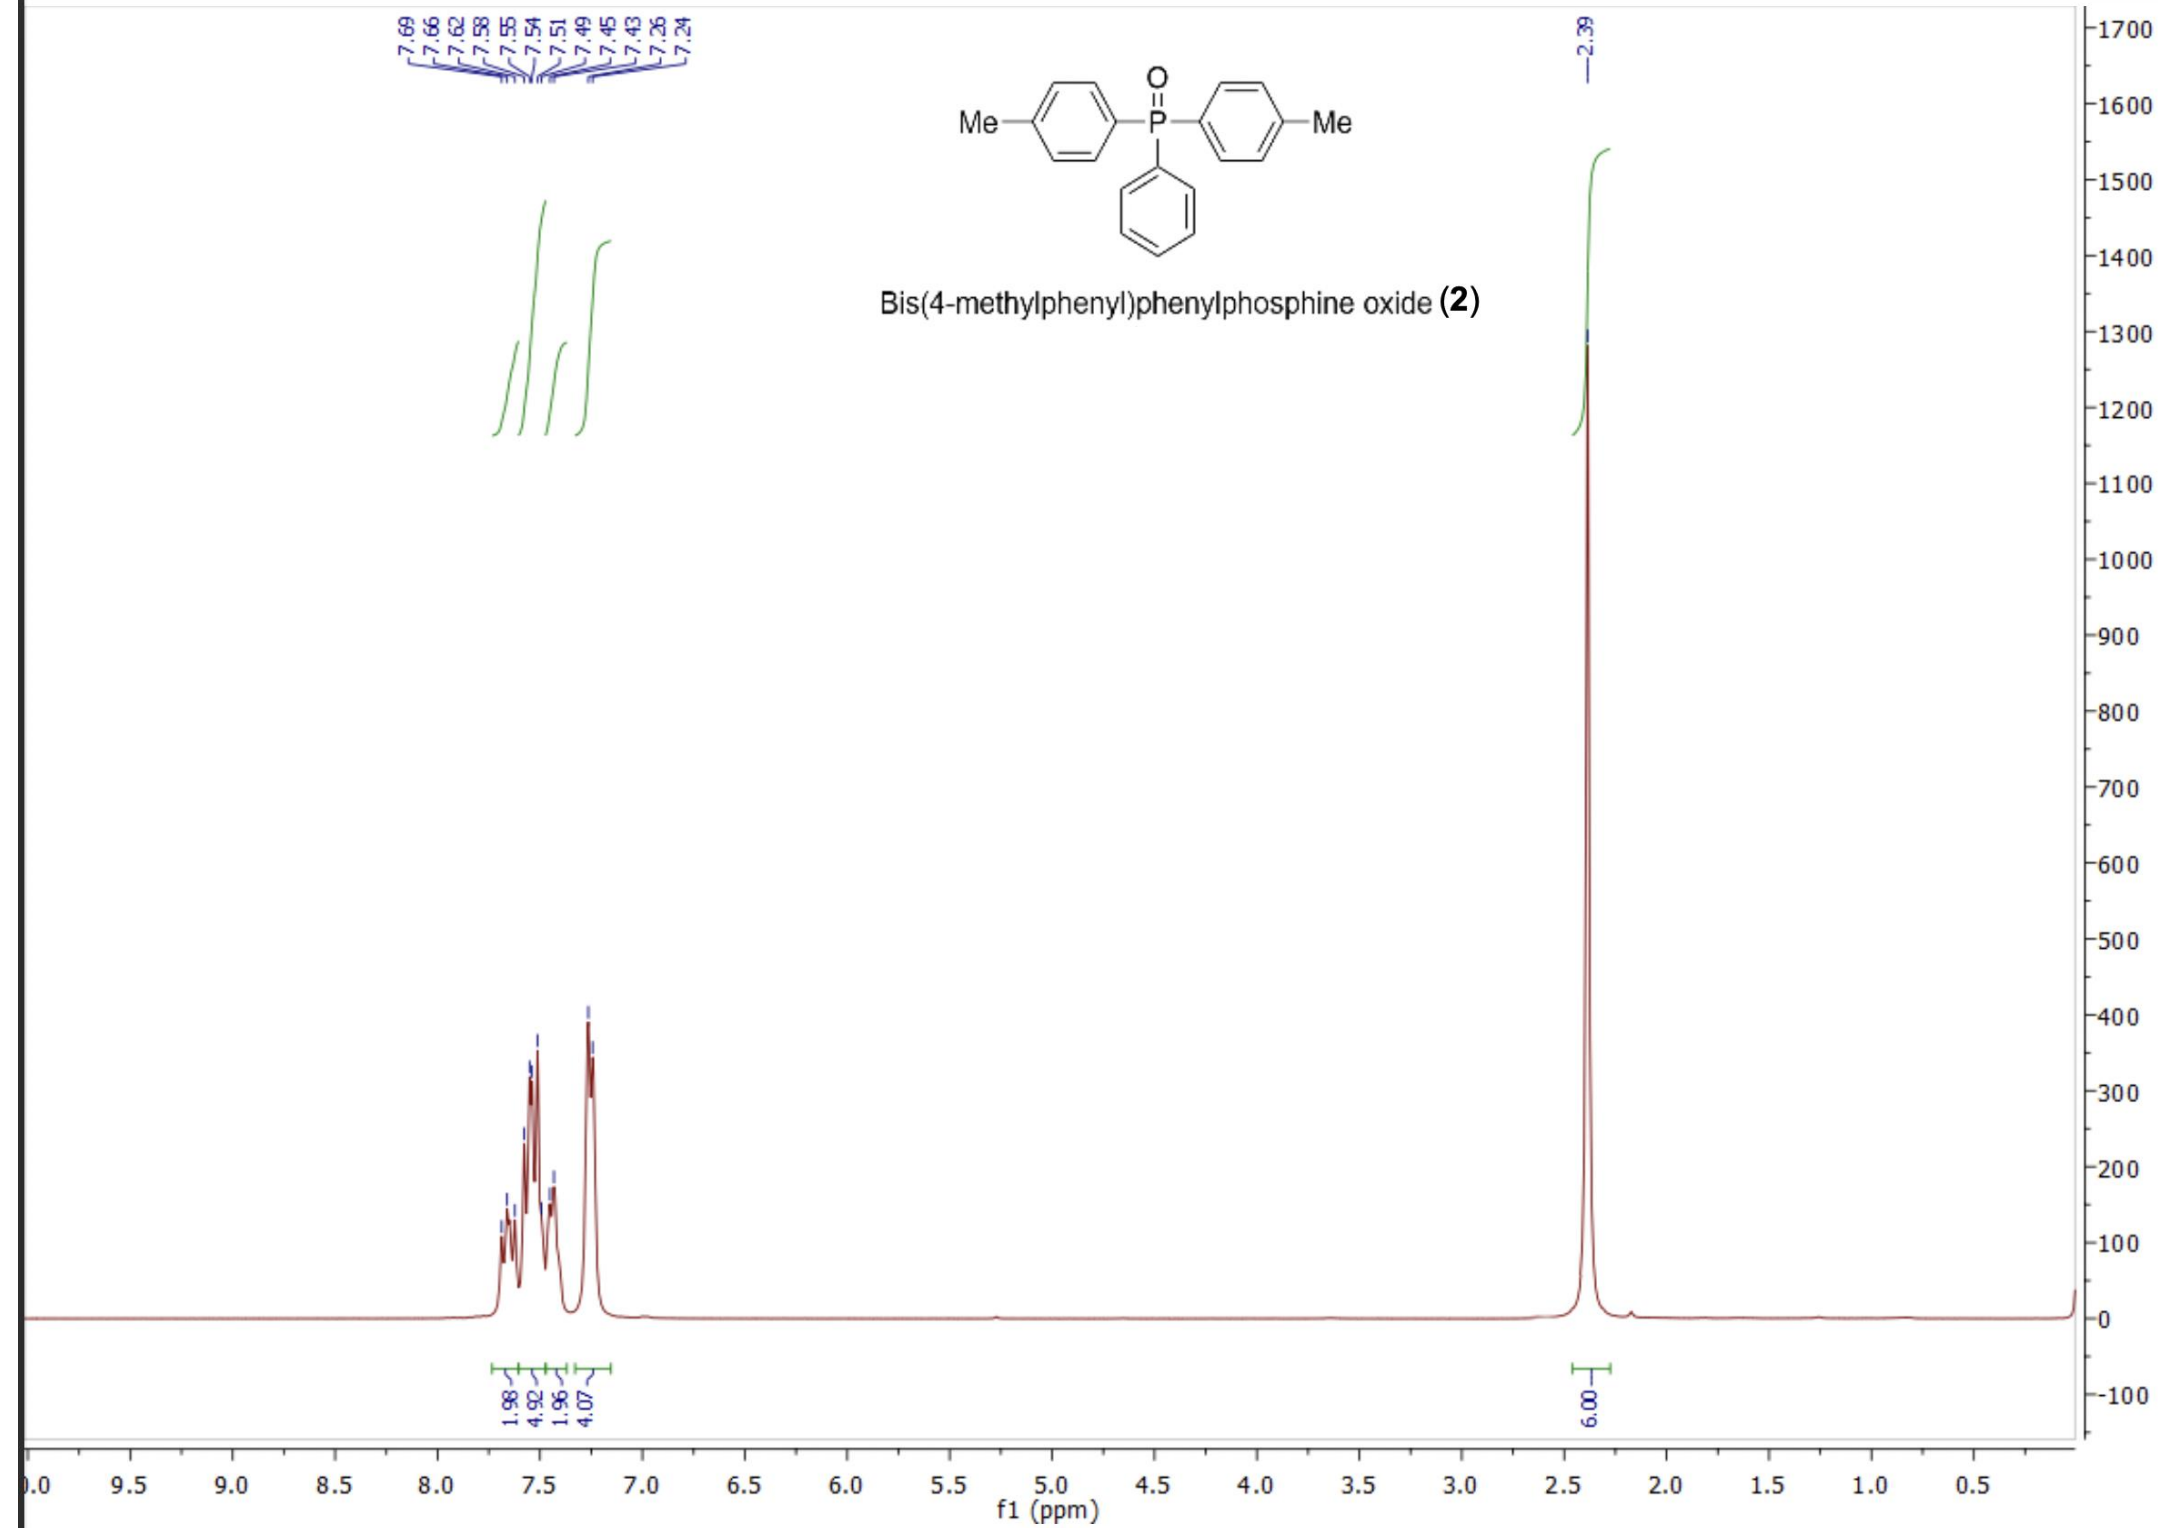

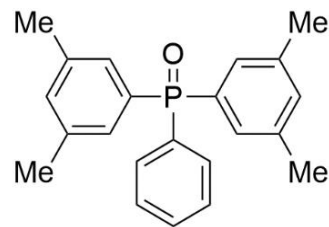

Bis(3,5-dimethylphenyl)phenylphosphine oxide  
**(3)**

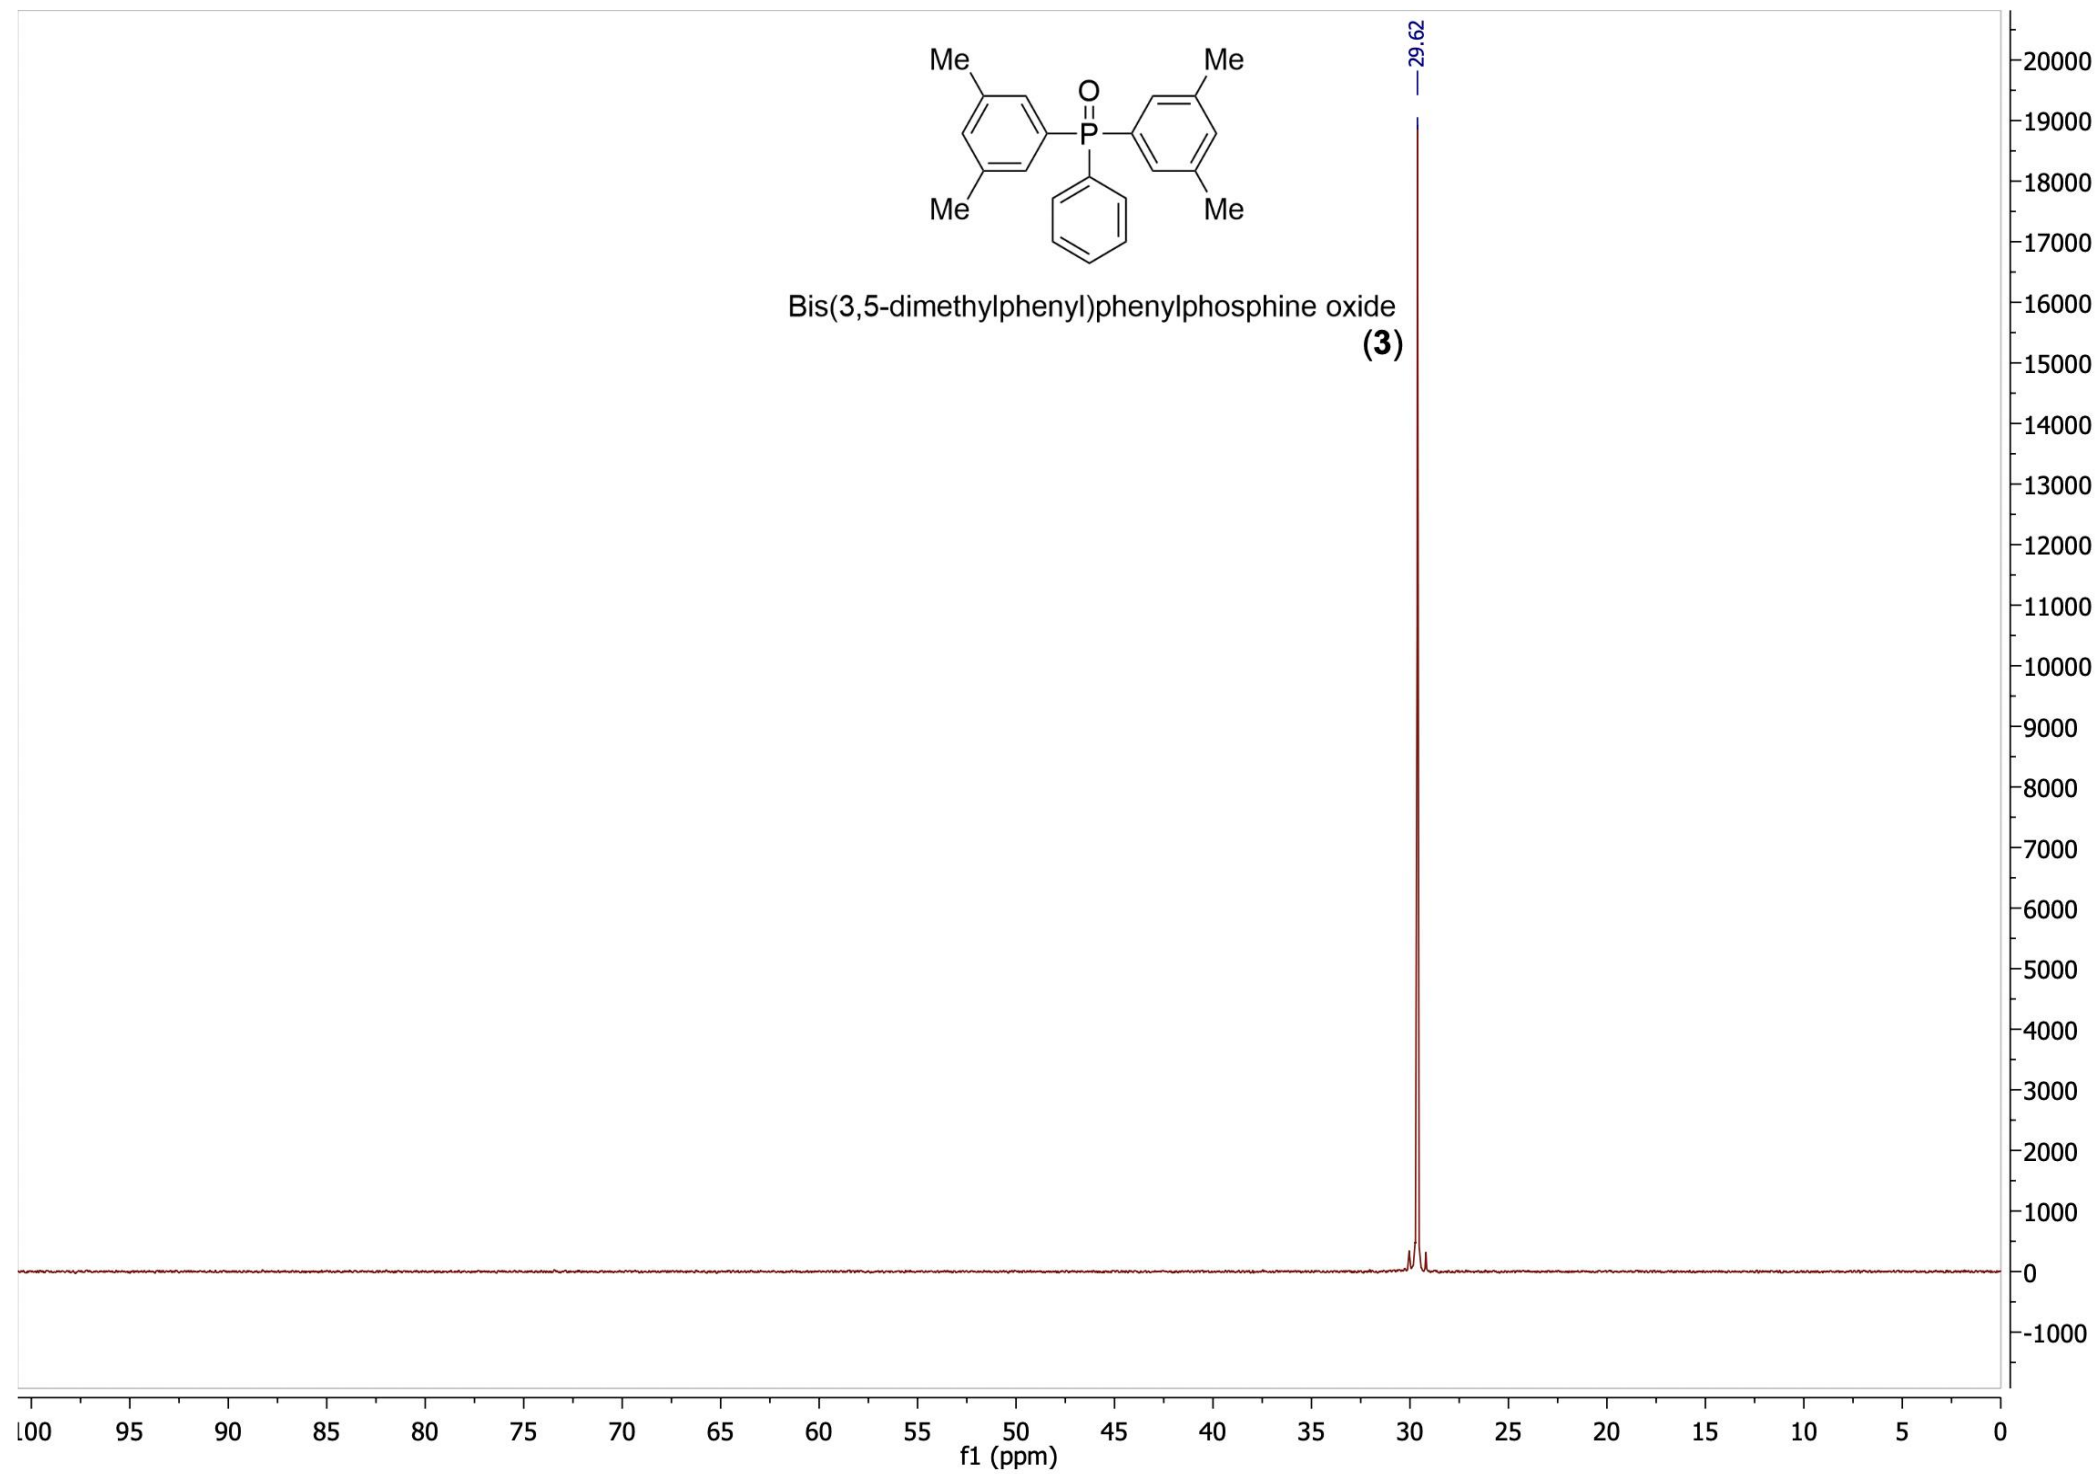



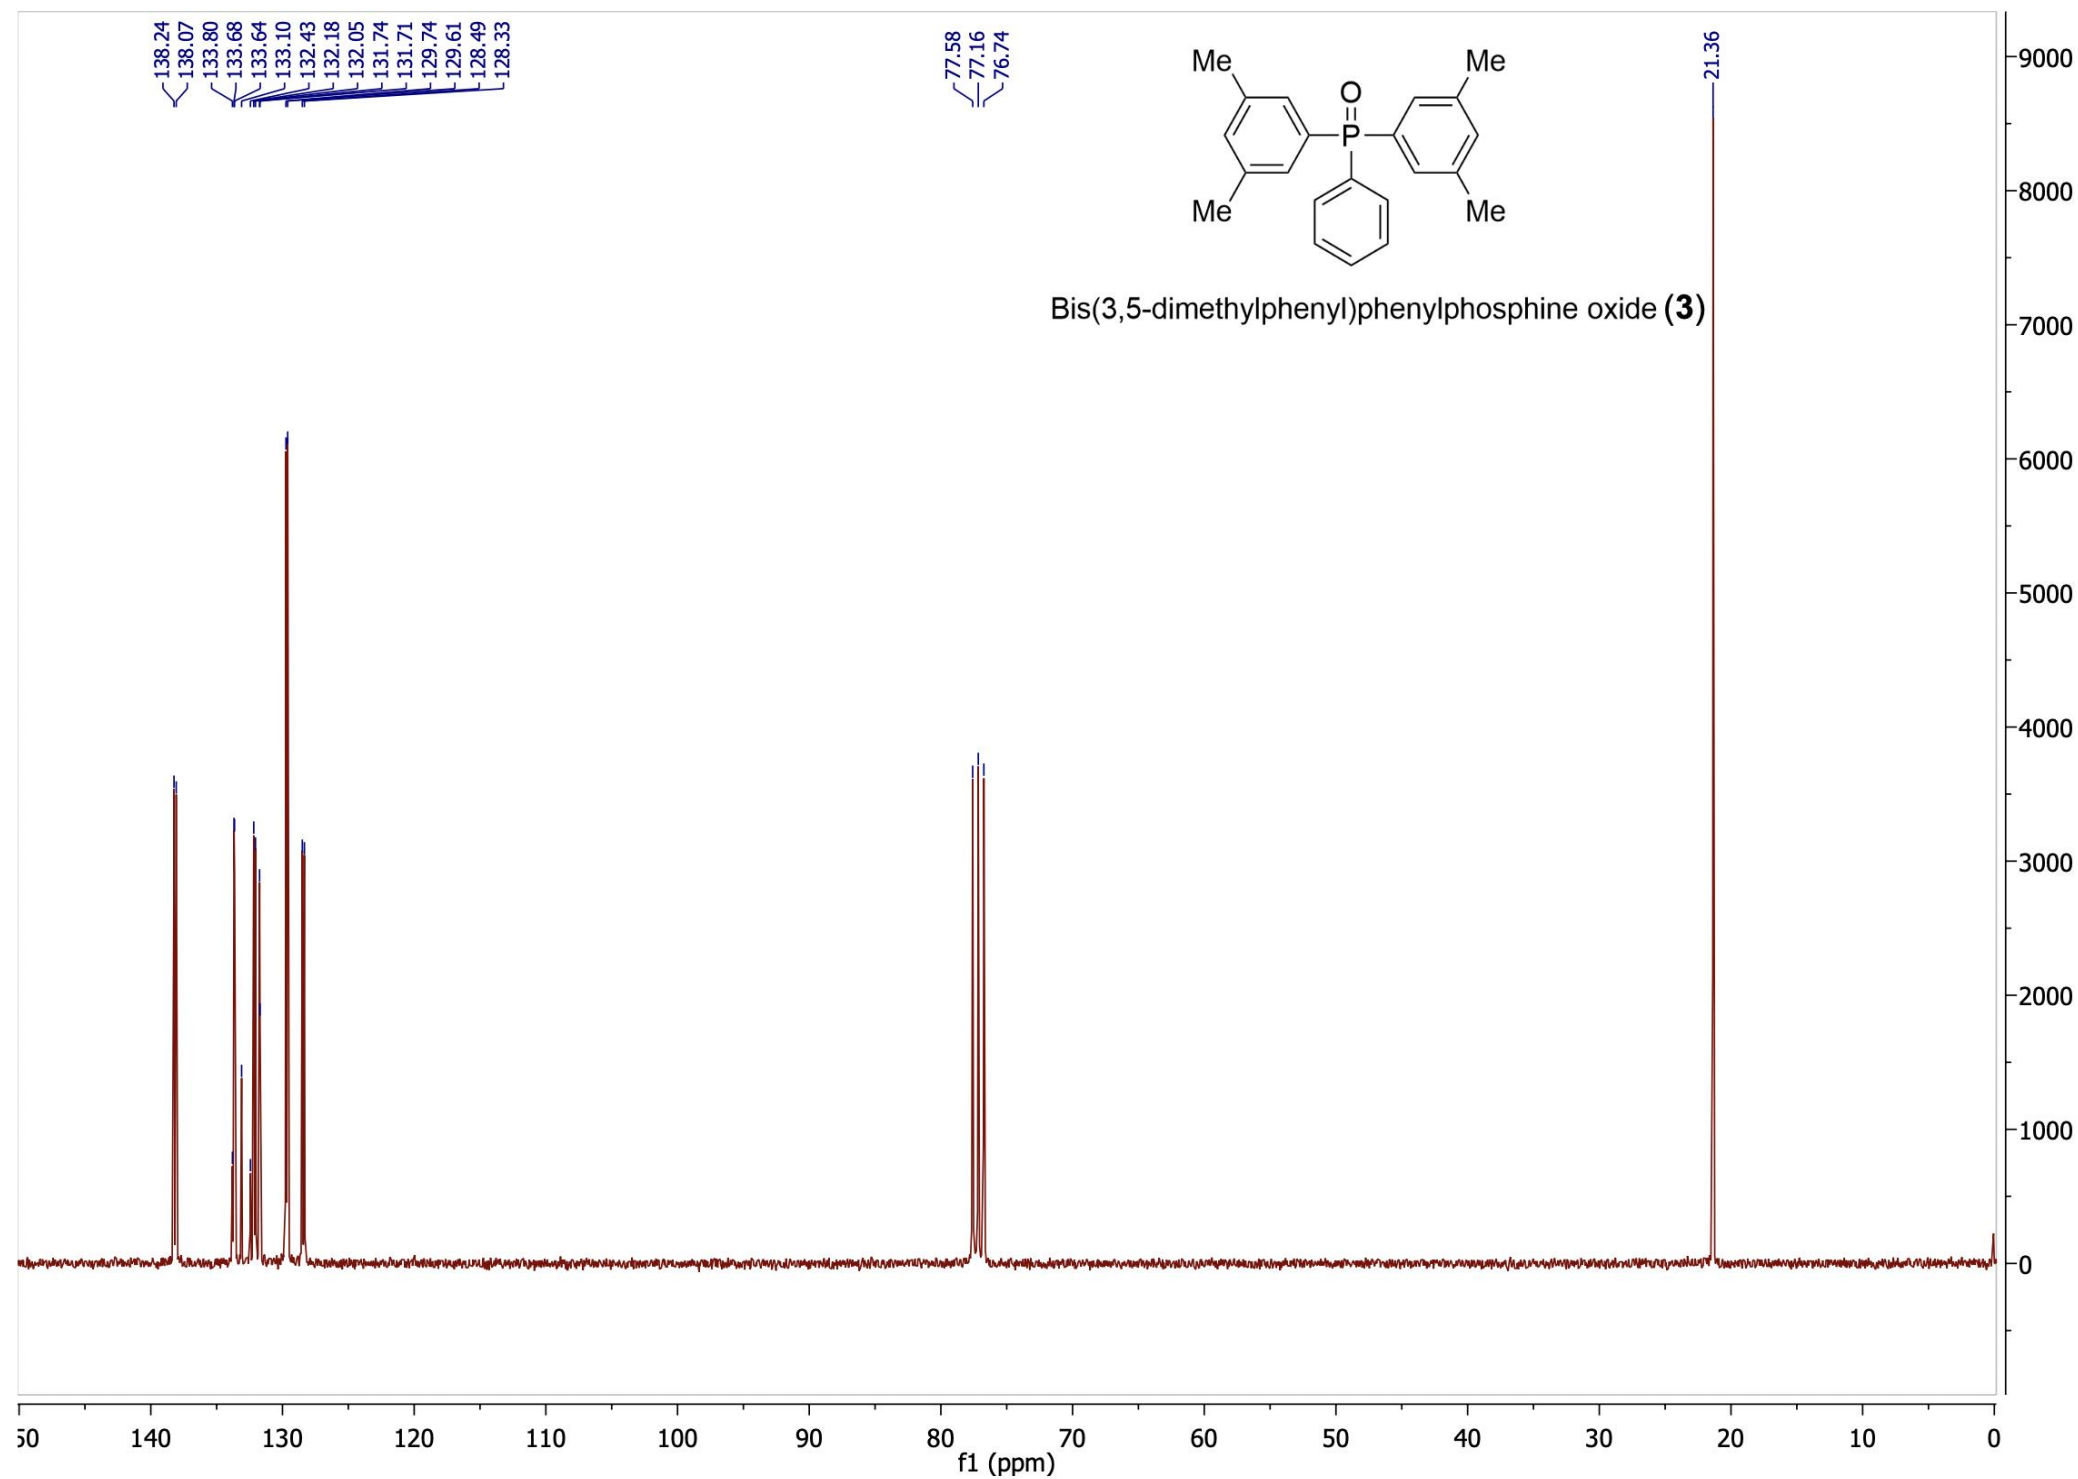

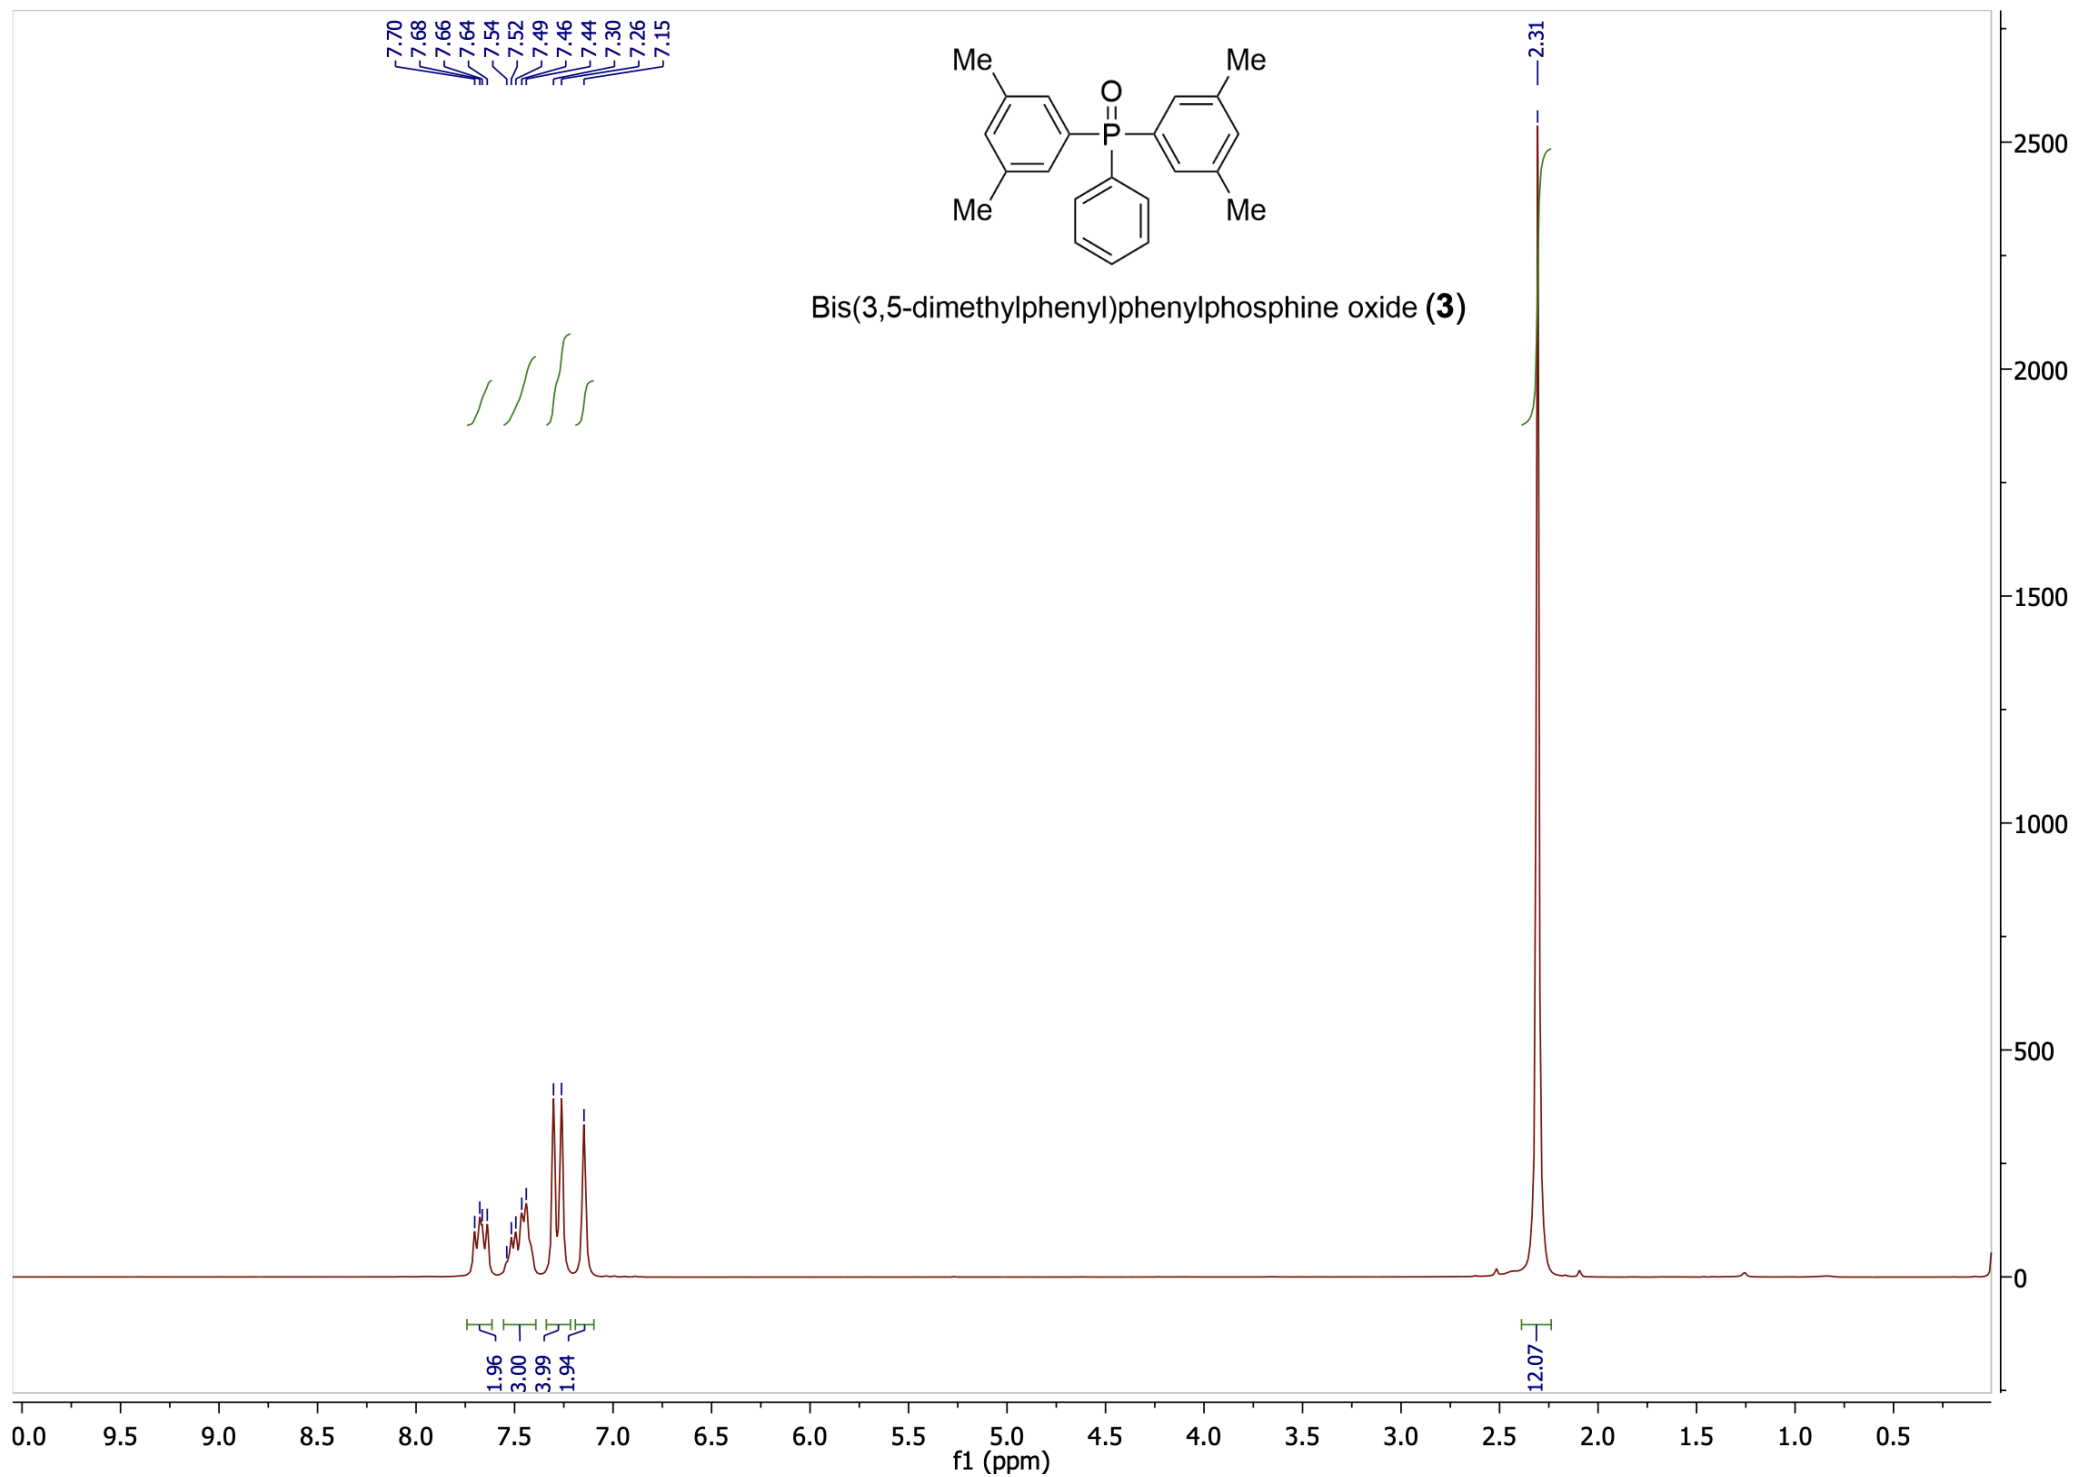

## 2. Tables containing the computed row data

**Table S1.** Computed energies ( $E$ ), zero point energies, internal energies ( $U$ ), enthalpies ( $H$ ) and Gibbs free energies ( $G$ ) given in Hartree as well as entropies ( $S$ ) given in  $\text{J mol}^{-1} \text{K}^{-1}$  at M06-2X/6-31G(d,p) basis set with the consideration of PCM solvent method using the parameter set of EtOH for **small molecules and ions**.

| Name                              | Number   | E              | ZPE          | U            | H            | G            | S       |
|-----------------------------------|----------|----------------|--------------|--------------|--------------|--------------|---------|
| CuBr                              |          | -4211.98477644 | -4211.984018 | -4211.981277 | -4211.980333 | -4212.008417 | 59.108  |
| Cu <sup>+</sup>                   |          | -1639.92259300 | -1639.922600 | -1639.921200 | -1639.920200 | -1639.938400 | 38.337  |
| Br <sup>-</sup>                   |          | -2571.92996300 | -2571.929963 | -2571.928547 | -2571.927603 | -2571.946139 | 39.012  |
| I <sup>-</sup>                    |          | -11.54638300   | -11.546383   | -11.544966   | -11.544022   | -11.563231   | 40.428  |
| HBr                               |          | -2572.37172100 | -2572.365531 | -2572.363171 | -2572.362226 | -2572.384741 | 47.387  |
| HI                                |          | -11.95576600   | -11.950644   | -11.948284   | -11.947340   | -11.970781   | 49.338  |
| NEt <sub>3</sub>                  |          | -292.27215906  | -292.064204  | -292.054881  | -292.053937  | -292.098218  | 93.198  |
| NEt <sub>3</sub> + H <sup>+</sup> |          | -292.72766900  | -292.503977  | -292.494605  | -292.493661  | -292.538322  | 93.997  |
| PPh <sub>3</sub>                  |          | -1035.98423600 | -1035.708238 | -1035.693338 | -1035.692394 | -1035.752522 | 126.549 |
| PhBr                              |          | -2803.32880000 | -2803.237306 | -2803.231664 | -2803.230719 | -2803.268117 | 78.710  |
| PhI                               |          | -242.91063496  | -242.819728  | -242.813876  | -242.812932  | -242.851454  | 81.077  |
| Ph <sub>2</sub> POH conf 1        |          | -880.23745910  | -880.038493  | -880.026309  | -880.025365  | -880.078844  | 112.556 |
| Ph <sub>2</sub> POH conf 2        |          | -880.23687896  | -880.037855  | -880.025579  | -880.024635  | -880.078754  | 113.903 |
| Ph <sub>2</sub> PHO               |          | -880.23902538  | -880.040644  | -880.028806  | -880.027862  | -880.081110  | 112.070 |
| Ph <sub>3</sub> P(O)              | <b>1</b> | -1111.21498115 | -1110.933946 | -1110.917256 | -1110.916312 | -1110.981071 | 136.297 |

**Table S2.** Computed energies ( $E$ ), zero point energies, internal energies ( $U$ ), enthalpies ( $H$ ) and Gibbs free energies ( $G$ ) given in Hartree as well as entropies ( $S$ ) given in  $\text{J mol}^{-1} \text{K}^{-1}$  at M06-2X/6-31G(d,p) basis set with the consideration of PCM solvent method using the parameter set of EtOH for  $\text{Cu}^+(\text{PPh}_3)_x$  and  $\text{Cu}^+(\text{PPh}_2\text{POH})_x$  complexes.

| Name                                   | Number   | E              | ZPE          | U            | H            | G            | S       |
|----------------------------------------|----------|----------------|--------------|--------------|--------------|--------------|---------|
| $\text{Cu}^+(\text{PPh}_3)$            |          | -2676.01298379 | -2675.735701 | -2675.717986 | -2675.717042 | -2675.784234 | 141.418 |
| $\text{Cu}^+(\text{PPh}_3)_2$          |          | -3712.07463274 | -3711.518202 | -3711.483257 | -3711.482313 | -3711.589331 | 225.240 |
| $\text{Cu}^+(\text{PPh}_3)_3$          |          | -4748.12807878 | -4747.292128 | -4747.240634 | -4747.239690 | -4747.380160 | 295.644 |
| $\text{Cu}^+(\text{PPh}_3)_4$          |          | -5784.14508000 | -5783.031610 | -5782.964331 | -5782.963387 | -5783.138696 | 368.970 |
| $\text{Cu}^+(\text{PPh}_2\text{OH})$   |          | -2520.26221079 | -2520.061161 | -2520.047309 | -2520.046365 | -2520.103783 | 120.847 |
| $\text{Cu}^+(\text{PPh}_2\text{OH})_2$ | <b>4</b> | -3400.57394647 | -3400.171807 | -3400.144031 | -3400.143087 | -3400.232307 | 187.778 |
| $\text{Cu}^+(\text{PPh}_2\text{OH})_3$ |          | -4280.87179492 | -4280.268732 | -4280.227569 | -4280.226625 | -4280.345662 | 250.536 |
| $\text{Cu}^+(\text{PPh}_2\text{OH})_4$ |          | -5161.16367655 | -5160.359666 | -5160.305164 | -5160.304219 | -5160.451514 | 310.007 |

**Table S3.** Computed energies ( $E$ ), zero point energies, internal energies ( $U$ ), enthalpies ( $H$ ) and Gibbs free energies ( $G$ ) given in Hartree as well as entropies ( $S$ ) given in  $\text{J mol}^{-1} \text{K}^{-1}$  at M06-2X/6-31G(d,p) basis set with the consideration of PCM solvent method using the parameter set of EtOH for  $\text{Cu}^+$  complexes containing  $\text{PPh}_2(\text{OH})$  and  $\text{NEt}_3$  ligands.

| Name                                                  | Number   | E              | ZPE          | U            | H            | G            | S       |
|-------------------------------------------------------|----------|----------------|--------------|--------------|--------------|--------------|---------|
| $\text{Cu}^+(\text{PPh}_2\text{OH})_2$                | <b>4</b> | -3400.57293955 | -3400.170449 | -3400.142742 | -3400.141798 | -3400.231288 | 188.348 |
| $\text{Cu}^{3+}(\text{PPh}_2\text{OH})_2$             |          | -3400.05578331 | -3399.650011 | -3399.623729 | -3399.622785 | -3399.704858 | 172.738 |
| $\text{Cu}^+(\text{PPh}_2\text{OH})(\text{NEt}_3)$    | <b>8</b> | -2812.61911095 | -2812.206408 | -2812.182193 | -2812.181249 | -2812.262155 | 170.283 |
| $\text{Cu}^{3+}(\text{PPh}_2\text{OH})(\text{NEt}_3)$ |          | -2812.08247295 | -2811.667631 | -2811.644557 | -2811.643613 | -2811.718920 | 158.498 |
| $\text{Cu}^+(\text{NEt}_3)_2$                         | <b>9</b> | -2224.66403274 | -2224.241580 | -2224.220911 | -2224.219967 | -2224.289680 | 146.724 |
| $\text{Cu}^{3+}(\text{NEt}_3)_2$                      |          | -2224.06797610 | -2223.640117 | -2223.621753 | -2223.620809 | -2223.683741 | 132.452 |

**Table S4.** Computed energies ( $E$ ), zero point energies, internal energies ( $U$ ), enthalpies ( $H$ ) and Gibbs free energies ( $G$ ) given in Hartree as well as entropies ( $S$ ) given in  $\text{J mol}^{-1} \text{K}^{-1}$  at M06-2X/6-31G(d,p) basis set with the consideration of PCM solvent method using the parameter set of EtOH for **Cu<sup>+</sup> complexes containing (PAr<sub>2</sub>OH)<sub>x</sub> and (NR<sub>3</sub>)<sub>x</sub> ligands.**

| Name                                                                                      | Number   | E              | ZPE          | U            | H            | G            | S       |
|-------------------------------------------------------------------------------------------|----------|----------------|--------------|--------------|--------------|--------------|---------|
| Cu <sup>+</sup> [4-MeC <sub>6</sub> H <sub>4</sub> ) <sub>2</sub> POH]                    |          | -2598.86207188 | -2598.606205 | -2598.588511 | -2598.587567 | -2598.655294 | 142.544 |
| Cu <sup>+</sup> [4-MeC <sub>6</sub> H <sub>4</sub> ) <sub>2</sub> POH] <sub>2</sub>       |          | -3557.77564417 | -3557.262862 | -3557.229204 | -3557.228260 | -3557.329015 | 212.057 |
| Cu <sup>+</sup> [4-MeC <sub>6</sub> H <sub>4</sub> ) <sub>2</sub> POH] <sub>3</sub>       |          | -4516.66890000 |              |              |              |              |         |
| Cu <sup>+</sup> [4-MeC <sub>6</sub> H <sub>4</sub> ) <sub>2</sub> POH] <sub>4</sub>       |          | -5475.56441442 |              |              |              |              |         |
| Cu <sup>+</sup> (NEt <sub>3</sub> )                                                       |          | -1932.31332203 | -1932.102462 | -1932.091931 | -1932.090987 | -1932.138350 | 99.683  |
| Cu <sup>+</sup> (NEt <sub>3</sub> ) <sub>2</sub>                                          | <b>9</b> | -2224.67366643 | -2224.251859 | -2224.231527 | -2224.230582 | -2224.299832 | 145.749 |
| Cu <sup>+</sup> (NEt <sub>3</sub> ) <sub>3</sub>                                          |          | -2516.96619796 | -2516.331918 | -2516.301340 | -2516.300396 | -2516.390347 | 189.318 |
| Cu <sup>+</sup> (NEt <sub>3</sub> ) <sub>4</sub>                                          |          | -2809.24493133 | -2808.398718 | -2808.358880 | -2808.357936 | -2808.467144 | 229.849 |
| Cu <sup>+</sup> (N <sup>i</sup> Pr <sub>2</sub> Et)                                       |          | -2010.89927645 | -2010.631644 | -2010.618618 | -2010.617674 | -2010.670833 | 111.883 |
| Cu <sup>+</sup> (N <sup>i</sup> Pr <sub>2</sub> Et) <sub>2</sub>                          |          | -2381.85210500 | -2381.317442 | -2381.292062 | -2381.291117 | -2381.369381 | 164.719 |
| Cu <sup>+</sup> (N <sup>i</sup> Pr <sub>2</sub> Et) <sub>3</sub>                          |          | -2752.72230999 | -2751.918955 | -2751.880710 | -2751.879766 | -2751.985251 | 222.012 |
| Cu <sup>+</sup> (NMe <sub>3</sub> )                                                       |          | -1814.41165700 | -1814.287364 | -1814.280400 | -1814.279456 | -1814.318454 | 82.080  |
| Cu <sup>+</sup> (NMe <sub>3</sub> ) <sub>2</sub>                                          |          | -1988.88710979 | -1988.637443 | -1988.625103 | -1988.624159 | -1988.675854 | 108.801 |
| Cu <sup>+</sup> (NMe <sub>3</sub> ) <sub>3</sub>                                          |          | -2163.30568513 | -2162.931256 | -2162.911887 | -2162.910942 | -2162.977160 | 139.366 |
| Cu <sup>+</sup> (NMe <sub>3</sub> ) <sub>4</sub>                                          |          | -2337.71788961 | -2337.219046 | -2337.193427 | -2337.192483 | -2337.270420 | 164.032 |
| Cu <sup>+</sup> [(3,5-diMe C <sub>6</sub> H <sub>3</sub> ) <sub>2</sub> POH]              |          | -2677.46045276 | -2677.149360 | -2677.127869 | -2677.126925 | -2677.204444 | 163.152 |
| Cu <sup>+</sup> [(3,5-diMe C <sub>6</sub> H <sub>3</sub> ) <sub>2</sub> POH] <sub>2</sub> |          | -3714.97490000 |              |              |              |              |         |
| Cu <sup>+</sup> [(3,5-diMe C <sub>6</sub> H <sub>3</sub> ) <sub>2</sub> POH] <sub>3</sub> |          | -4752.46490000 |              |              |              |              |         |
| Cu <sup>+</sup> [(3,5-diMe C <sub>6</sub> H <sub>3</sub> ) <sub>2</sub> POH] <sub>4</sub> |          | -5789.96566380 | -5788.717569 | -5788.636036 | -5788.635092 | -5788.836210 | 423.288 |

**Table S5.** Computed energies (*E*), zero point energies, internal energies (*U*), enthalpies (*H*) and Gibbs free energies (*G*) given in Hartree as well as entropies (*S*) given in J mol<sup>-1</sup> K<sup>-1</sup> at M06-2X/6-31G(d,p) basis set with the consideration of PCM solvent method using the parameter set of EtOH for the mechanism of **Cu<sup>+</sup> complexes containing PPh<sub>2</sub>(OH) ligands.**

| Name                                                                                  | Number       | E              | ZPE          | U            | H            | G            | S       |
|---------------------------------------------------------------------------------------|--------------|----------------|--------------|--------------|--------------|--------------|---------|
| Cu <sup>+</sup> (PPh <sub>2</sub> OH)(PPh <sub>2</sub> O <sup>-</sup> )               | <b>4'</b>    | -3400.13180900 | -3399.742303 | -3399.715224 | -3399.714280 | -3399.803827 | 188.468 |
| Cu <sup>+</sup> (PPh <sub>2</sub> OH)(PPh <sub>2</sub> O <sup>-</sup> )---PhBr        | <b>5</b>     | -6203.49281987 | -6203.011881 | -6202.976747 | -6202.975802 | -6203.085393 | 230.652 |
| TS[Cu <sup>+</sup> (PPh <sub>2</sub> OH)(PPh <sub>2</sub> O <sup>-</sup> )...Ph...Br] | <b>TS5,6</b> | -6203.47201000 | -6202.991604 | -6202.957151 | -6202.956206 | -6203.062849 | 224.449 |
| Cu <sup>3+</sup> (PPh <sub>2</sub> OH)(PPh <sub>2</sub> O <sup>-</sup> )(Ph)(Br)      | <b>6</b>     | -6203.49220276 | -6203.008851 | -6202.974930 | -6202.973986 | -6203.077145 | 217.117 |
| TS[Cu <sup>+</sup> (PPh <sub>2</sub> OH)(PPh <sub>2</sub> O <sup>-</sup> )(Ph)(Br)]   | <b>TS6,7</b> | -6203.45135600 | -6202.969553 | -6202.936989 | -6202.936045 | -6203.036418 | 211.254 |
| Cu <sup>+</sup> (PPh <sub>2</sub> OH)(Br)(Ph)(PPh <sub>2</sub> O)                     | <b>7</b>     | -6203.57382635 | -6203.090434 | -6203.055951 | -6203.055007 | -6203.162049 | 225.289 |

**Table S6.** Computed energies (*E*), zero point energies, internal energies (*U*), enthalpies (*H*) and Gibbs free energies (*G*) given in Hartree as well as entropies (*S*) given in J mol<sup>-1</sup> K<sup>-1</sup> at M06-2X/6-31G(d,p) basis set with the consideration of PCM solvent method using the parameter set of EtOH for the mechanism of **Cu<sup>+</sup> complexes containing PPh<sub>2</sub>(O<sup>-</sup>) and NEt<sub>3</sub> ligands.**

| Name                                                                                | Number         | E              | ZPE          | U            | H            | G            | S       |
|-------------------------------------------------------------------------------------|----------------|----------------|--------------|--------------|--------------|--------------|---------|
| Cu <sup>+</sup> (PPh <sub>2</sub> O <sup>-</sup> )(NEt <sub>3</sub> )               | <b>8'</b>      | -2812.17637910 | -2811.776603 | -2811.752922 | -2811.751978 | -2811.831208 | 166.754 |
| Cu <sup>+</sup> (PPh <sub>2</sub> O <sup>-</sup> )(NEt <sub>3</sub> )---PhBr        | <b>10</b>      | -5615.52399407 | -5615.031699 | -5615.000528 | -5614.999584 | -5615.096606 | 204.199 |
| TS[Cu <sup>+</sup> (PPh <sub>2</sub> O <sup>-</sup> )(NEt <sub>3</sub> )...Ph...Br] | <b>TS10,11</b> | -5615.51392030 | -5615.022717 | -5614.992198 | -5614.991254 | -5615.086287 | 200.015 |
| Cu <sup>3+</sup> (PPh <sub>2</sub> O <sup>-</sup> )(NEt <sub>3</sub> )(Ph)(Br)      | <b>11</b>      | -5615.52500963 | -5615.031804 | -5615.001197 | -5615.000253 | -5615.095369 | 200.188 |
| TS[Cu <sup>+</sup> (PPh <sub>2</sub> O <sup>-</sup> )(NEt <sub>3</sub> )(Ph)(Br)]   | <b>TS11,12</b> | -5615.47529200 |              |              |              |              |         |
| Cu <sup>+</sup> (NEt <sub>3</sub> )(Br)(Ph)(PPh <sub>2</sub> O)                     | <b>12</b>      | -5615.60632996 | -5615.112761 | -5615.081499 | -5615.080555 | -5615.179600 | 208.459 |

**Table S7.** Computed energies ( $E$ ), zero point energies, internal energies ( $U$ ), enthalpies ( $H$ ) and Gibbs free energies ( $G$ ) given in Hartree as well as entropies ( $S$ ) given in  $\text{J mol}^{-1} \text{K}^{-1}$  at M06-2X/6-31G(d,p) basis set with the consideration of PCM solvent method using the parameter set of EtOH for the mechanism of  **$\text{Cu}^+$  complexes containing  $\text{NEt}_3$  ligands.**

| Name                                                                   | Number         | E              | ZPE          | U            | H            | G            | S       |
|------------------------------------------------------------------------|----------------|----------------|--------------|--------------|--------------|--------------|---------|
| $\text{Cu}^+(\text{NEt}_3)_2\cdots\text{PhBr}$                         | <b>13</b>      | -5028.01684904 | -5027.501507 | -5027.473258 | -5027.472314 | -5027.559928 | 184.399 |
| $\text{TS}[\text{Cu}^+(\text{NEt}_3)_2\cdots\text{Ph}\cdots\text{Br}]$ | <b>TS13,14</b> | -5027.97390900 |              |              |              |              |         |
| $\text{Cu}^{3+}(\text{NEt}_3)_2(\text{Ph})(\text{Br})$                 | <b>14</b>      | -5027.99244260 | -5027.474995 | -5027.447847 | -5027.446903 | -5027.530631 | 176.221 |

### 3. Tables containing XYZ geometries of computed species

#### CuBr

Standard orientation:

| Center<br>Number | Atomic<br>Number | Atomic<br>Type | Coordinates (Angstroms) |          |           |
|------------------|------------------|----------------|-------------------------|----------|-----------|
|                  |                  |                | X                       | Y        | Z         |
| 1                | 29               | 0              | 0.000000                | 0.000000 | -1.181702 |
| 2                | 35               | 0              | 0.000000                | 0.000000 | 0.979124  |

#### Cu<sup>+</sup>

Standard orientation:

| Center<br>Number | Atomic<br>Number | Atomic<br>Type | Coordinates (Angstroms) |          |          |
|------------------|------------------|----------------|-------------------------|----------|----------|
|                  |                  |                | X                       | Y        | Z        |
| 1                | 29               | 0              | 0.000000                | 0.000000 | 0.000000 |

#### Br<sup>-</sup>

Standard orientation:

| Center<br>Number | Atomic<br>Number | Atomic<br>Type | Coordinates (Angstroms) |          |          |
|------------------|------------------|----------------|-------------------------|----------|----------|
|                  |                  |                | X                       | Y        | Z        |
| 1                | 35               | 0              | 0.000000                | 0.000000 | 0.000000 |

#### HBr

Standard orientation:

| Center<br>Number | Atomic<br>Number | Atomic<br>Type | Coordinates (Angstroms) |          |           |
|------------------|------------------|----------------|-------------------------|----------|-----------|
|                  |                  |                | X                       | Y        | Z         |
| 1                | 35               | 0              | 0.000000                | 0.000000 | 0.039244  |
| 2                | 1                | 0              | 0.000000                | 0.000000 | -1.373537 |



## HI

Standard orientation:

| Center<br>Number | Atomic<br>Number | Atomic<br>Type | Coordinates (Angstroms) |          |           |
|------------------|------------------|----------------|-------------------------|----------|-----------|
|                  |                  |                | X                       | Y        | Z         |
| 1                | 53               | 0              | 0.000000                | 0.000000 | 0.029964  |
| 2                | 1                | 0              | 0.000000                | 0.000000 | -1.588113 |

## NEt<sub>3</sub>

Standard orientation:

| Center<br>Number | Atomic<br>Number | Atomic<br>Type | Coordinates (Angstroms) |           |           |
|------------------|------------------|----------------|-------------------------|-----------|-----------|
|                  |                  |                | X                       | Y         | Z         |
| 1                | 7                | 0              | -0.000085               | -0.000083 | -0.174561 |
| 2                | 6                | 0              | 0.447559                | 1.315349  | 0.285372  |
| 3                | 1                | 0              | 1.472927                | 1.457577  | -0.064151 |
| 4                | 1                | 0              | 0.480263                | 1.353752  | 1.392782  |
| 5                | 6                | 0              | -1.362818               | -0.270346 | 0.286098  |
| 6                | 1                | 0              | -1.998874               | 0.546885  | -0.062231 |
| 7                | 1                | 0              | -1.411612               | -0.262298 | 1.393544  |
| 8                | 6                | 0              | 0.915416                | -1.045421 | 0.285181  |
| 9                | 1                | 0              | 0.526067                | -2.004488 | -0.064626 |
| 10               | 1                | 0              | 0.932168                | -1.093194 | 1.392579  |
| 11               | 6                | 0              | 2.337542                | -0.894626 | -0.246148 |
| 12               | 1                | 0              | 2.885963                | -0.083123 | 0.236862  |
| 13               | 1                | 0              | 2.896267                | -1.816996 | -0.069491 |
| 14               | 1                | 0              | 2.317276                | -0.705526 | -1.323271 |
| 15               | 6                | 0              | -0.393813               | 2.471569  | -0.246361 |
| 16               | 1                | 0              | -1.370856               | 2.541160  | 0.236517  |
| 17               | 1                | 0              | 0.125769                | 3.416600  | -0.069981 |
| 18               | 1                | 0              | -0.547308               | 2.358909  | -1.323453 |
| 19               | 6                | 0              | -1.943876               | -1.576484 | -0.246578 |
| 20               | 1                | 0              | -1.515001               | -2.458027 | 0.234603  |
| 21               | 1                | 0              | -3.021924               | -1.599347 | -0.069230 |
| 22               | 1                | 0              | -1.770590               | -1.651545 | -1.323903 |

## NEt<sub>3</sub> + H<sup>+</sup>

Standard orientation:

| Center<br>Number | Atomic<br>Number | Atomic<br>Type | Coordinates (Angstroms) |           |           |
|------------------|------------------|----------------|-------------------------|-----------|-----------|
|                  |                  |                | X                       | Y         | Z         |
| 1                | 7                | 0              | 0.000113                | -0.000780 | -0.196197 |
| 2                | 6                | 0              | -0.055579               | 1.441463  | 0.245237  |
| 3                | 1                | 0              | 0.803761                | 1.930898  | -0.210635 |
| 4                | 1                | 0              | 0.082718                | 1.431013  | 1.329207  |
| 5                | 6                | 0              | -1.220300               | -0.768718 | 0.249459  |
| 6                | 1                | 0              | -2.075350               | -0.266865 | -0.200759 |
| 7                | 1                | 0              | -1.276482               | -0.646881 | 1.334084  |
| 8                | 6                | 0              | 1.277116                | -0.671570 | 0.249028  |
| 9                | 1                | 0              | 1.271223                | -1.662758 | -0.201438 |
| 10               | 1                | 0              | 1.200251                | -0.780623 | 1.333803  |
| 11               | 6                | 0              | 2.529834                | 0.083102  | -0.160575 |
| 12               | 1                | 0              | 2.674976                | 0.999849  | 0.411338  |
| 13               | 1                | 0              | 3.386432                | -0.565463 | 0.029859  |
| 14               | 1                | 0              | 2.525550                | 0.320747  | -1.228251 |
| 15               | 6                | 0              | -1.337835               | 2.147055  | -0.159570 |
| 16               | 1                | 0              | -2.201510               | 1.813826  | 0.416242  |
| 17               | 1                | 0              | -1.204799               | 3.213622  | 0.028393  |
| 18               | 1                | 0              | -1.544606               | 2.021728  | -1.226057 |
| 19               | 6                | 0              | -1.193686               | -2.230329 | -0.161381 |
| 20               | 1                | 0              | -0.468916               | -2.813945 | 0.406486  |
| 21               | 1                | 0              | -2.182522               | -2.649818 | 0.030370  |
| 22               | 1                | 0              | -0.988056               | -2.341359 | -1.229700 |
| 23               | 1                | 0              | -0.000760               | -0.004525 | -1.222756 |

## Ph<sub>3</sub>P

Standard orientation:

| Center<br>Number | Atomic<br>Number | Atomic<br>Type | Coordinates (Angstroms) |           |           |
|------------------|------------------|----------------|-------------------------|-----------|-----------|
|                  |                  |                | X                       | Y         | Z         |
| 1                | 15               | 0              | -0.002528               | -0.007112 | -1.275968 |
| 2                | 6                | 0              | 1.325228                | -0.983774 | -0.449886 |
| 3                | 6                | 0              | 1.133806                | -1.753439 | 0.702442  |
| 4                | 6                | 0              | 2.603946                | -0.920002 | -1.017216 |
| 5                | 6                | 0              | 2.202239                | -2.439539 | 1.277311  |
| 6                | 1                | 0              | 0.147918                | -1.815884 | 1.153704  |
| 7                | 6                | 0              | 3.673289                | -1.595593 | -0.436117 |
| 8                | 6                | 0              | 3.472847                | -2.358888 | 0.712462  |
| 9                | 1                | 0              | 2.042328                | -3.035071 | 2.170770  |
| 10               | 1                | 0              | 4.660201                | -1.532654 | -0.883422 |

|    |   |   |           |           |           |
|----|---|---|-----------|-----------|-----------|
| 11 | 6 | 0 | 0.182036  | 1.631820  | -0.449980 |
| 12 | 6 | 0 | -0.540957 | 2.702043  | -0.992410 |
| 13 | 6 | 0 | 0.986000  | 1.858907  | 0.671657  |
| 14 | 6 | 0 | -0.476214 | 3.967617  | -0.416539 |
| 15 | 6 | 0 | 1.060123  | 3.129525  | 1.240883  |
| 16 | 1 | 0 | 1.555718  | 1.041624  | 1.104470  |
| 17 | 6 | 0 | 0.327957  | 4.183843  | 0.701472  |
| 18 | 1 | 0 | 4.304234  | -2.891972 | 1.162730  |
| 19 | 1 | 0 | 0.386164  | 5.171632  | 1.147345  |
| 20 | 1 | 0 | 1.688582  | 3.292977  | 2.110855  |
| 21 | 1 | 0 | -1.045488 | 4.786480  | -0.845142 |
| 22 | 1 | 0 | 2.761401  | -0.334756 | -1.920031 |
| 23 | 1 | 0 | -1.159121 | 2.541786  | -1.872713 |
| 24 | 6 | 0 | -1.512303 | -0.663474 | -0.445893 |
| 25 | 6 | 0 | -2.097677 | -1.809001 | -0.999721 |
| 26 | 6 | 0 | -2.089496 | -0.093019 | 0.693239  |
| 27 | 6 | 0 | -3.226129 | -2.381584 | -0.420154 |
| 28 | 1 | 0 | -1.665991 | -2.254465 | -1.892911 |
| 29 | 6 | 0 | -3.226477 | -0.659733 | 1.266765  |
| 30 | 1 | 0 | -1.649078 | 0.796174  | 1.134915  |
| 31 | 6 | 0 | -3.794131 | -1.805263 | 0.714148  |
| 32 | 1 | 0 | -3.667302 | -3.271276 | -0.858340 |
| 33 | 1 | 0 | -3.666948 | -0.206269 | 2.149239  |
| 34 | 1 | 0 | -4.679218 | -2.244324 | 1.163266  |

## PhBr

Standard orientation:

| Center<br>Number | Atomic<br>Number | Atomic<br>Type | Coordinates (Angstroms) |           |           |
|------------------|------------------|----------------|-------------------------|-----------|-----------|
|                  |                  |                | X                       | Y         | Z         |
| 1                | 6                | 0              | 2.866508                | 0.000006  | 0.000001  |
| 2                | 6                | 0              | 2.169223                | 1.205851  | -0.000003 |
| 3                | 6                | 0              | 0.776385                | 1.214397  | 0.000001  |
| 4                | 6                | 0              | 0.100128                | -0.000027 | -0.000000 |
| 5                | 6                | 0              | 0.776393                | -1.214405 | -0.000004 |
| 6                | 6                | 0              | 2.169267                | -1.205824 | 0.000002  |
| 7                | 1                | 0              | 3.951156                | 0.000044  | 0.000007  |
| 8                | 1                | 0              | 2.706804                | 2.148334  | -0.000004 |
| 9                | 1                | 0              | 0.223087                | 2.146620  | 0.000007  |
| 10               | 1                | 0              | 0.223169                | -2.146671 | 0.000001  |
| 11               | 1                | 0              | 2.706822                | -2.148322 | 0.000001  |
| 12               | 35               | 0              | -1.798813               | 0.000000  | 0.000000  |

## PhI

Standard orientation:

| Center<br>Number | Atomic<br>Number | Atomic<br>Type | Coordinates (Angstroms) |           |           |
|------------------|------------------|----------------|-------------------------|-----------|-----------|
|                  |                  |                | X                       | Y         | Z         |
| 1                | 6                | 0              | -0.578709               | -0.000019 | -0.000000 |
| 2                | 6                | 0              | -1.256161               | 1.214262  | 0.000004  |
| 3                | 6                | 0              | -2.650283               | 1.205073  | -0.000005 |
| 4                | 6                | 0              | -3.347704               | 0.000007  | 0.000002  |
| 5                | 6                | 0              | -2.650319               | -1.205056 | 0.000004  |
| 6                | 6                | 0              | -1.256173               | -1.214264 | -0.000005 |
| 7                | 1                | 0              | -0.713953               | 2.153170  | -0.000000 |
| 8                | 1                | 0              | -3.187334               | 2.147997  | -0.000003 |
| 9                | 1                | 0              | -4.432408               | 0.000035  | -0.000001 |
| 10               | 1                | 0              | -3.187350               | -2.147992 | 0.000007  |
| 11               | 1                | 0              | -0.714015               | -2.153202 | -0.000010 |
| 12               | 53               | 0              | 1.559833                | -0.000000 | 0.000000  |

## Ph<sub>2</sub>P(OH) conf. 1

Standard orientation:

| Center<br>Number | Atomic<br>Number | Atomic<br>Type | Coordinates (Angstroms) |           |           |
|------------------|------------------|----------------|-------------------------|-----------|-----------|
|                  |                  |                | X                       | Y         | Z         |
| 1                | 15               | 0              | -0.017413               | 1.470066  | -0.595511 |
| 2                | 8                | 0              | 0.093970                | 2.451659  | 0.742950  |
| 3                | 1                | 0              | 0.119436                | 1.956220  | 1.575689  |
| 4                | 6                | 0              | -1.408923               | 0.344707  | -0.159734 |
| 5                | 6                | 0              | -2.569723               | 0.399751  | -0.935711 |
| 6                | 6                | 0              | -1.361211               | -0.530242 | 0.933811  |
| 7                | 6                | 0              | -3.665877               | -0.405955 | -0.628971 |
| 8                | 1                | 0              | -2.613854               | 1.074066  | -1.787070 |
| 9                | 6                | 0              | -2.456879               | -1.326167 | 1.248361  |
| 10               | 1                | 0              | -0.454770               | -0.600730 | 1.531447  |
| 11               | 6                | 0              | -3.609697               | -1.265518 | 0.464038  |
| 12               | 1                | 0              | -4.560371               | -0.361987 | -1.241807 |
| 13               | 1                | 0              | -2.412564               | -1.999565 | 2.098338  |
| 14               | 1                | 0              | -4.462159               | -1.892271 | 0.705975  |
| 15               | 6                | 0              | 1.391580                | 0.323344  | -0.296024 |
| 16               | 6                | 0              | 1.416736                | -0.931734 | -0.916652 |
| 17               | 6                | 0              | 2.486955                | 0.722103  | 0.474906  |
| 18               | 6                | 0              | 2.510377                | -1.775568 | -0.758232 |
| 19               | 1                | 0              | 0.568460                | -1.256178 | -1.515041 |
| 20               | 6                | 0              | 3.581007                | -0.127281 | 0.637658  |
| 21               | 1                | 0              | 2.483021                | 1.698636  | 0.950765  |

|    |   |   |          |           |           |
|----|---|---|----------|-----------|-----------|
| 22 | 6 | 0 | 3.595084 | -1.375261 | 0.022463  |
| 23 | 1 | 0 | 2.515662 | -2.748898 | -1.238709 |
| 24 | 1 | 0 | 4.423006 | 0.189075  | 1.245387  |
| 25 | 1 | 0 | 4.446993 | -2.035700 | 0.148609  |

## Ph<sub>2</sub>P(OH) conf. 2

Standard orientation:

| Center<br>Number | Atomic<br>Number | Atomic<br>Type | Coordinates (Angstroms) |           |           |
|------------------|------------------|----------------|-------------------------|-----------|-----------|
|                  |                  |                | X                       | Y         | Z         |
| 1                | 15               | 0              | 0.012390                | 1.376948  | -0.836426 |
| 2                | 8                | 0              | 0.170150                | 2.485445  | 0.400080  |
| 3                | 1                | 0              | -0.013508               | 3.373272  | 0.070304  |
| 4                | 6                | 0              | -1.401938               | 0.374714  | -0.225132 |
| 5                | 6                | 0              | -2.299808               | -0.163519 | -1.148543 |
| 6                | 6                | 0              | -1.591980               | 0.136381  | 1.141028  |
| 7                | 6                | 0              | -3.369363               | -0.948150 | -0.715590 |
| 8                | 1                | 0              | -2.165391               | 0.033837  | -2.209431 |
| 9                | 6                | 0              | -2.665813               | -0.632378 | 1.573854  |
| 10               | 1                | 0              | -0.893980               | 0.562117  | 1.857260  |
| 11               | 6                | 0              | -3.552797               | -1.179708 | 0.643903  |
| 12               | 1                | 0              | -4.062283               | -1.366933 | -1.438371 |
| 13               | 1                | 0              | -2.812743               | -0.812694 | 2.634185  |
| 14               | 1                | 0              | -4.388901               | -1.783375 | 0.982600  |
| 15               | 6                | 0              | 1.380193                | 0.256737  | -0.334267 |
| 16               | 6                | 0              | 1.420504                | -1.045061 | -0.847086 |
| 17               | 6                | 0              | 2.415191                | 0.698111  | 0.492053  |
| 18               | 6                | 0              | 2.475465                | -1.894244 | -0.531048 |
| 19               | 1                | 0              | 0.614891                | -1.400773 | -1.486241 |
| 20               | 6                | 0              | 3.470384                | -0.156260 | 0.810865  |
| 21               | 1                | 0              | 2.382620                | 1.705660  | 0.893300  |
| 22               | 6                | 0              | 3.503940                | -1.450576 | 0.300249  |
| 23               | 1                | 0              | 2.494586                | -2.903755 | -0.929539 |
| 24               | 1                | 0              | 4.266968                | 0.191790  | 1.461271  |
| 25               | 1                | 0              | 4.326816                | -2.113209 | 0.548683  |

## Ph<sub>2</sub>PHO

Standard orientation:

| Center<br>Number | Atomic<br>Number | Atomic<br>Type | Coordinates (Angstroms) |           |           |
|------------------|------------------|----------------|-------------------------|-----------|-----------|
|                  |                  |                | X                       | Y         | Z         |
| 1                | 15               | 0              | -0.006992               | 1.410988  | -0.349110 |
| 2                | 8                | 0              | -0.142700               | 2.621819  | 0.526079  |
| 3                | 1                | 0              | 0.118020                | 1.695952  | -1.725355 |
| 4                | 6                | 0              | 1.435938                | 0.357429  | -0.072362 |
| 5                | 6                | 0              | 2.487904                | 0.333671  | -0.990199 |
| 6                | 6                | 0              | 1.502080                | -0.424830 | 1.086567  |
| 7                | 6                | 0              | 3.601128                | -0.469753 | -0.751980 |
| 8                | 1                | 0              | 2.439794                | 0.938534  | -1.891943 |
| 9                | 6                | 0              | 2.616334                | -1.220167 | 1.324737  |
| 10               | 1                | 0              | 0.676799                | -0.416850 | 1.794280  |
| 11               | 6                | 0              | 3.664503                | -1.242998 | 0.404270  |
| 12               | 1                | 0              | 4.416186                | -0.491912 | -1.467721 |
| 13               | 1                | 0              | 2.666574                | -1.827448 | 2.222301  |
| 14               | 1                | 0              | 4.531680                | -1.868779 | 0.589366  |
| 15               | 6                | 0              | -1.424301               | 0.290786  | -0.226464 |
| 16               | 6                | 0              | -1.433785               | -0.935611 | -0.897446 |
| 17               | 6                | 0              | -2.514079               | 0.672656  | 0.556338  |
| 18               | 6                | 0              | -2.536680               | -1.774922 | -0.788320 |
| 19               | 1                | 0              | -0.577270               | -1.236667 | -1.496115 |
| 20               | 6                | 0              | -3.614693               | -0.174985 | 0.669753  |
| 21               | 1                | 0              | -2.485710               | 1.627180  | 1.073644  |
| 22               | 6                | 0              | -3.625495               | -1.393931 | -0.002914 |
| 23               | 1                | 0              | -2.547367               | -2.726773 | -1.308907 |
| 24               | 1                | 0              | -4.461900               | 0.116190  | 1.281913  |
| 25               | 1                | 0              | -4.483450               | -2.052871 | 0.084672  |

## Ph<sub>3</sub>P(O) (1)

Standard orientation:

| Center<br>Number | Atomic<br>Number | Atomic<br>Type | Coordinates (Angstroms) |          |           |
|------------------|------------------|----------------|-------------------------|----------|-----------|
|                  |                  |                | X                       | Y        | Z         |
| 1                | 15               | 0              | -0.001378               | 0.011621 | 0.944573  |
| 2                | 6                | 0              | 1.358502                | 0.994252 | 0.248411  |
| 3                | 6                | 0              | 1.262306                | 1.678512 | -0.966612 |
| 4                | 6                | 0              | 2.554129                | 1.027077 | 0.973534  |
| 5                | 6                | 0              | 2.361264                | 2.378868 | -1.458149 |
| 6                | 1                | 0              | 0.330553                | 1.672880 | -1.525726 |
| 7                | 6                | 0              | 3.648635                | 1.730384 | 0.480579  |
| 8                | 6                | 0              | 3.552836                | 2.403070 | -0.736397 |

|    |   |   |           |           |           |
|----|---|---|-----------|-----------|-----------|
| 9  | 1 | 0 | 2.284773  | 2.910239  | -2.401099 |
| 10 | 1 | 0 | 4.574331  | 1.756020  | 1.045989  |
| 11 | 6 | 0 | 0.181021  | -1.652442 | 0.238566  |
| 12 | 6 | 0 | -0.320374 | -2.720972 | 0.987492  |
| 13 | 6 | 0 | 0.769500  | -1.889966 | -1.007181 |
| 14 | 6 | 0 | -0.247239 | -4.017244 | 0.486154  |
| 15 | 6 | 0 | 0.836309  | -3.187714 | -1.507610 |
| 16 | 1 | 0 | 1.182846  | -1.065595 | -1.582720 |
| 17 | 6 | 0 | 0.326669  | -4.249284 | -0.762499 |
| 18 | 1 | 0 | 4.406798  | 2.952046  | -1.120304 |
| 19 | 1 | 0 | 0.383592  | -5.260167 | -1.153293 |
| 20 | 1 | 0 | 1.292790  | -3.370032 | -2.474941 |
| 21 | 1 | 0 | -0.634100 | -4.846217 | 1.069738  |
| 22 | 1 | 0 | 2.614790  | 0.510207  | 1.927044  |
| 23 | 1 | 0 | -0.753784 | -2.529014 | 1.964755  |
| 24 | 6 | 0 | -1.533664 | 0.684715  | 0.237873  |
| 25 | 6 | 0 | -2.238078 | 1.618529  | 1.003433  |
| 26 | 6 | 0 | -2.015285 | 0.308785  | -1.019499 |
| 27 | 6 | 0 | -3.411187 | 2.180936  | 0.507833  |
| 28 | 1 | 0 | -1.869514 | 1.886617  | 1.989369  |
| 29 | 6 | 0 | -3.186224 | 0.877127  | -1.513673 |
| 30 | 1 | 0 | -1.485257 | -0.435690 | -1.607663 |
| 31 | 6 | 0 | -3.882484 | 1.812528  | -0.750717 |
| 32 | 1 | 0 | -3.959774 | 2.902089  | 1.104790  |
| 33 | 1 | 0 | -3.559892 | 0.582084  | -2.488617 |
| 34 | 1 | 0 | -4.798784 | 2.248975  | -1.135072 |
| 35 | 8 | 0 | -0.011064 | 0.006035  | 2.446241  |

## Cu<sup>+</sup>(PPh<sub>3</sub>)

Standard orientation:

| Center<br>Number | Atomic<br>Number | Atomic<br>Type | Coordinates (Angstroms) |           |           |
|------------------|------------------|----------------|-------------------------|-----------|-----------|
|                  |                  |                | X                       | Y         | Z         |
| 1                | 15               | 0              | 0.218677                | 0.017470  | -0.704370 |
| 2                | 6                | 0              | 1.266653                | -1.352963 | -0.148438 |
| 3                | 6                | 0              | 2.166873                | -1.904654 | -1.065837 |
| 4                | 6                | 0              | 1.219252                | -1.839401 | 1.162942  |
| 5                | 6                | 0              | 3.019989                | -2.931188 | -0.671527 |
| 6                | 1                | 0              | 2.195864                | -1.533121 | -2.086347 |
| 7                | 6                | 0              | 2.069587                | -2.870274 | 1.549837  |
| 8                | 1                | 0              | 0.512846                | -1.419172 | 1.873864  |
| 9                | 6                | 0              | 2.970182                | -3.413526 | 0.634383  |
| 10               | 6                | 0              | 0.990827                | 1.581645  | -0.224122 |
| 11               | 6                | 0              | 0.646459                | 2.726115  | -0.950618 |
| 12               | 6                | 0              | 1.879959                | 1.674796  | 0.851053  |
| 13               | 6                | 0              | 1.172058                | 3.962715  | -0.588778 |

|    |    |   |           |           |           |
|----|----|---|-----------|-----------|-----------|
| 14 | 1  | 0 | -0.028096 | 2.648790  | -1.799723 |
| 15 | 6  | 0 | 2.411133  | 2.912095  | 1.200889  |
| 16 | 1  | 0 | 2.155858  | 0.785191  | 1.409953  |
| 17 | 6  | 0 | 2.054891  | 4.054362  | 0.484844  |
| 18 | 1  | 0 | 3.630773  | -4.218332 | 0.939553  |
| 19 | 1  | 0 | 2.471409  | 5.017252  | 0.761911  |
| 20 | 1  | 0 | 3.103097  | 2.985485  | 2.033107  |
| 21 | 1  | 0 | 0.901497  | 4.850172  | -1.150682 |
| 22 | 1  | 0 | 3.717790  | -3.357000 | -1.384469 |
| 23 | 1  | 0 | 2.029695  | -3.249421 | 2.565457  |
| 24 | 6  | 0 | -1.280996 | -0.112213 | 0.380947  |
| 25 | 6  | 0 | -1.711053 | 0.916899  | 1.225251  |
| 26 | 6  | 0 | -2.109336 | -1.250225 | 0.204511  |
| 27 | 6  | 0 | -2.927131 | 0.808928  | 1.894693  |
| 28 | 1  | 0 | -1.091392 | 1.798102  | 1.362146  |
| 29 | 6  | 0 | -3.318779 | -1.348272 | 0.894342  |
| 30 | 1  | 0 | -1.736026 | -2.138604 | -0.314345 |
| 31 | 6  | 0 | -3.734955 | -0.315219 | 1.727525  |
| 32 | 1  | 0 | -3.242488 | 1.608350  | 2.557044  |
| 33 | 1  | 0 | -3.927864 | -2.239035 | 0.783288  |
| 34 | 1  | 0 | -4.678810 | -0.390298 | 2.255978  |
| 35 | 29 | 0 | -1.724413 | -0.317522 | -1.745261 |

---



## $\text{Cu}^+(\text{PPh}_3)_2$

Standard orientation:

| Center<br>Number | Atomic<br>Number | Atomic<br>Type | Coordinates (Angstroms) |           |           |
|------------------|------------------|----------------|-------------------------|-----------|-----------|
|                  |                  |                | X                       | Y         | Z         |
| 1                | 15               | 0              | 2.081856                | -0.059829 | 0.481552  |
| 2                | 6                | 0              | 2.053039                | 1.126261  | -0.904051 |
| 3                | 6                | 0              | 2.317141                | 2.480756  | -0.667360 |
| 4                | 6                | 0              | 1.587381                | 0.720046  | -2.157361 |
| 5                | 6                | 0              | 2.137812                | 3.412947  | -1.684886 |
| 6                | 1                | 0              | 2.666737                | 2.807249  | 0.308724  |
| 7                | 6                | 0              | 1.396950                | 1.660216  | -3.167919 |
| 8                | 1                | 0              | 1.365833                | -0.327626 | -2.343796 |
| 9                | 6                | 0              | 1.672384                | 3.005097  | -2.934754 |
| 10               | 6                | 0              | 3.556580                | 0.347300  | 1.460147  |
| 11               | 6                | 0              | 3.521896                | 0.093175  | 2.834738  |
| 12               | 6                | 0              | 4.723153                | 0.859824  | 0.879641  |
| 13               | 6                | 0              | 4.642746                | 0.343273  | 3.621566  |
| 14               | 1                | 0              | 2.615863                | -0.297614 | 3.290647  |
| 15               | 6                | 0              | 5.840038                | 1.111829  | 1.669864  |
| 16               | 1                | 0              | 4.753215                | 1.077242  | -0.184577 |
| 17               | 6                | 0              | 5.800409                | 0.852952  | 3.039033  |
| 18               | 1                | 0              | 1.525137                | 3.735656  | -3.723177 |
| 19               | 1                | 0              | 6.672137                | 1.055294  | 3.652604  |
| 20               | 1                | 0              | 6.740738                | 1.512988  | 1.217502  |
| 21               | 1                | 0              | 4.609315                | 0.146250  | 4.687684  |
| 22               | 1                | 0              | 2.356331                | 4.459747  | -1.499287 |
| 23               | 1                | 0              | 1.035373                | 1.337329  | -4.139087 |
| 24               | 15               | 0              | -2.081784               | 0.059858  | 0.481517  |
| 25               | 6                | 0              | -2.053158               | -1.126339 | -0.903985 |
| 26               | 6                | 0              | -1.587708               | -0.720213 | -2.157399 |
| 27               | 6                | 0              | -2.317159               | -2.480828 | -0.667132 |
| 28               | 6                | 0              | -1.397391               | -1.660464 | -3.167906 |
| 29               | 1                | 0              | -1.366235               | 0.327454  | -2.343954 |
| 30               | 6                | 0              | -2.137948               | -3.413098 | -1.684604 |
| 31               | 6                | 0              | -1.672727               | -3.005336 | -2.934579 |
| 32               | 1                | 0              | -1.035972               | -1.337651 | -4.139156 |
| 33               | 1                | 0              | -2.356387               | -4.459894 | -1.498881 |
| 34               | 6                | 0              | -3.556400               | -0.347167 | 1.460342  |
| 35               | 6                | 0              | -3.521584               | -0.092888 | 2.834900  |
| 36               | 6                | 0              | -4.723024               | -0.859782 | 0.880015  |
| 37               | 6                | 0              | -4.642350               | -0.342926 | 3.621870  |
| 38               | 6                | 0              | -5.839824               | -1.111722 | 1.670378  |
| 39               | 1                | 0              | -4.753190               | -1.077312 | -0.184176 |
| 40               | 6                | 0              | -5.800061               | -0.852695 | 3.039515  |
| 41               | 1                | 0              | -1.525565               | -3.735957 | -3.722960 |
| 42               | 1                | 0              | -6.671721               | -1.054990 | 3.653198  |
| 43               | 1                | 0              | -6.740565               | -1.512943 | 1.218152  |

|    |    |   |           |           |           |
|----|----|---|-----------|-----------|-----------|
| 44 | 1  | 0 | -4.608809 | -0.145786 | 4.687963  |
| 45 | 1  | 0 | -2.666584 | -2.807248 | 0.309038  |
| 46 | 1  | 0 | -2.615523 | 0.297975  | 3.290689  |
| 47 | 6  | 0 | 2.366914  | -1.677036 | -0.303048 |
| 48 | 6  | 0 | 3.609115  | -2.062296 | -0.816510 |
| 49 | 6  | 0 | 1.271800  | -2.538070 | -0.413563 |
| 50 | 6  | 0 | 3.744156  | -3.296935 | -1.442455 |
| 51 | 1  | 0 | 4.468678  | -1.404369 | -0.725560 |
| 52 | 6  | 0 | 1.407605  | -3.769888 | -1.047911 |
| 53 | 1  | 0 | 0.311275  | -2.234294 | -0.005503 |
| 54 | 6  | 0 | 2.645163  | -4.148499 | -1.560029 |
| 55 | 1  | 0 | 4.708554  | -3.598117 | -1.837769 |
| 56 | 1  | 0 | 0.549388  | -4.427933 | -1.132980 |
| 57 | 1  | 0 | 2.758114  | -5.110906 | -2.048295 |
| 58 | 6  | 0 | -2.366908 | 1.677005  | -0.303164 |
| 59 | 6  | 0 | -3.609101 | 2.062100  | -0.816773 |
| 60 | 6  | 0 | -1.271886 | 2.538165  | -0.413572 |
| 61 | 6  | 0 | -3.744227 | 3.296711  | -1.442750 |
| 62 | 1  | 0 | -4.468588 | 1.404060  | -0.725917 |
| 63 | 6  | 0 | -1.407777 | 3.769962  | -1.047949 |
| 64 | 1  | 0 | -0.311364 | 2.234505  | -0.005421 |
| 65 | 6  | 0 | -2.645324 | 4.148412  | -1.560207 |
| 66 | 1  | 0 | -4.708615 | 3.597766  | -1.838183 |
| 67 | 1  | 0 | -0.549632 | 4.428110  | -1.132941 |
| 68 | 1  | 0 | -2.758339 | 5.110797  | -2.048501 |
| 69 | 29 | 0 | 0.000034  | 0.000024  | 1.298104  |

## Cu<sup>+</sup>(PPh<sub>3</sub>)<sub>3</sub>

Standard orientation:

| Center<br>Number | Atomic<br>Number | Atomic<br>Type | Coordinates (Angstroms) |           |           |
|------------------|------------------|----------------|-------------------------|-----------|-----------|
|                  |                  |                | X                       | Y         | Z         |
| 1                | 15               | 0              | 2.062347                | 1.093271  | -0.373453 |
| 2                | 15               | 0              | -2.044028               | 1.162832  | -0.240752 |
| 3                | 6                | 0              | 3.383040                | -0.168273 | -0.385584 |
| 4                | 6                | 0              | 4.364895                | -0.292850 | 0.599844  |
| 5                | 6                | 0              | 3.333299                | -1.098641 | -1.429878 |
| 6                | 6                | 0              | 5.270786                | -1.351899 | 0.546308  |
| 7                | 1                | 0              | 4.411274                | 0.419436  | 1.418558  |
| 8                | 6                | 0              | 4.226588                | -2.162871 | -1.474660 |
| 9                | 1                | 0              | 2.577389                | -1.002979 | -2.206082 |
| 10               | 6                | 0              | 5.195665                | -2.292271 | -0.479550 |
| 11               | 1                | 0              | 6.029574                | -1.448393 | 1.316267  |
| 12               | 1                | 0              | 4.149751                | -2.896375 | -2.272035 |
| 13               | 6                | 0              | 2.575646                | 2.312985  | -1.624349 |
| 14               | 6                | 0              | 1.589198                | 3.026762  | -2.313237 |

|    |    |   |           |           |           |
|----|----|---|-----------|-----------|-----------|
| 15 | 6  | 0 | 3.926205  | 2.580083  | -1.874898 |
| 16 | 6  | 0 | 1.950226  | 4.002944  | -3.238882 |
| 17 | 1  | 0 | 0.537203  | 2.827306  | -2.120390 |
| 18 | 6  | 0 | 4.283123  | 3.551056  | -2.804532 |
| 19 | 1  | 0 | 4.695255  | 2.024413  | -1.344851 |
| 20 | 6  | 0 | 3.295845  | 4.263304  | -3.485140 |
| 21 | 6  | 0 | -2.488322 | 0.648082  | 1.464560  |
| 22 | 6  | 0 | -1.848310 | 1.275587  | 2.541415  |
| 23 | 6  | 0 | -3.314302 | -0.455362 | 1.709692  |
| 24 | 6  | 0 | -2.056248 | 0.827419  | 3.842072  |
| 25 | 1  | 0 | -1.184189 | 2.118623  | 2.370501  |
| 26 | 6  | 0 | -3.530181 | -0.891068 | 3.016172  |
| 27 | 1  | 0 | -3.790552 | -0.984141 | 0.889021  |
| 28 | 6  | 0 | -2.905002 | -0.251899 | 4.084489  |
| 29 | 6  | 0 | -2.045172 | 2.993800  | -0.189947 |
| 30 | 6  | 0 | -0.872928 | 3.638627  | 0.220649  |
| 31 | 6  | 0 | -3.152572 | 3.764796  | -0.556751 |
| 32 | 6  | 0 | -0.810156 | 5.027064  | 0.285240  |
| 33 | 1  | 0 | 0.003273  | 3.057081  | 0.493630  |
| 34 | 6  | 0 | -3.085027 | 5.154707  | -0.502689 |
| 35 | 1  | 0 | -4.066639 | 3.285921  | -0.893615 |
| 36 | 6  | 0 | -1.918015 | 5.787955  | -0.079856 |
| 37 | 1  | 0 | -3.071992 | -0.597132 | 5.099724  |
| 38 | 1  | 0 | 5.890446  | -3.125423 | -0.503222 |
| 39 | 1  | 0 | 3.577553  | 5.020302  | -4.209897 |
| 40 | 1  | 0 | -1.871400 | 6.871284  | -0.040987 |
| 41 | 1  | 0 | 5.331311  | 3.753139  | -2.998478 |
| 42 | 1  | 0 | 1.180538  | 4.554440  | -3.768382 |
| 43 | 1  | 0 | -3.948483 | 5.744136  | -0.793026 |
| 44 | 1  | 0 | 0.107490  | 5.506988  | 0.611677  |
| 45 | 1  | 0 | -1.553725 | 1.324931  | 4.665570  |
| 46 | 1  | 0 | -4.180511 | -1.742331 | 3.191529  |
| 47 | 15 | 0 | -0.028822 | -2.163457 | -0.154529 |
| 48 | 6  | 0 | -1.708763 | -2.870002 | -0.006297 |
| 49 | 6  | 0 | -2.152488 | -3.667977 | 1.050568  |
| 50 | 6  | 0 | -2.589290 | -2.557112 | -1.047209 |
| 51 | 6  | 0 | -3.476158 | -4.101904 | 1.084464  |
| 52 | 1  | 0 | -1.475731 | -3.936510 | 1.856179  |
| 53 | 6  | 0 | -3.909619 | -2.994345 | -1.016540 |
| 54 | 6  | 0 | -4.357889 | -3.757292 | 0.060686  |
| 55 | 1  | 0 | -3.819322 | -4.709725 | 1.915518  |
| 56 | 1  | 0 | -4.585004 | -2.721775 | -1.822134 |
| 57 | 6  | 0 | 0.839600  | -3.373366 | -1.207165 |
| 58 | 6  | 0 | 0.914667  | -3.104507 | -2.577176 |
| 59 | 6  | 0 | 1.374543  | -4.564247 | -0.707731 |
| 60 | 6  | 0 | 1.543437  | -4.002297 | -3.435877 |
| 61 | 6  | 0 | 2.015168  | -5.454161 | -1.564712 |
| 62 | 1  | 0 | 1.301013  | -4.791444 | 0.352097  |
| 63 | 6  | 0 | 2.103975  | -5.172206 | -2.927058 |
| 64 | 1  | 0 | -5.390324 | -4.088989 | 0.100309  |

|     |    |   |           |           |           |
|-----|----|---|-----------|-----------|-----------|
| 65  | 1  | 0 | 2.604355  | -5.867551 | -3.593151 |
| 66  | 1  | 0 | 2.439536  | -6.371289 | -1.169782 |
| 67  | 1  | 0 | 1.601345  | -3.785901 | -4.497441 |
| 68  | 1  | 0 | -2.247199 | -1.949608 | -1.881055 |
| 69  | 1  | 0 | 0.488769  | -2.184182 | -2.972835 |
| 70  | 6  | 0 | -3.455698 | 0.729865  | -1.306553 |
| 71  | 6  | 0 | -4.784325 | 0.738822  | -0.866904 |
| 72  | 6  | 0 | -3.177950 | 0.409056  | -2.639959 |
| 73  | 6  | 0 | -5.812969 | 0.401075  | -1.742134 |
| 74  | 1  | 0 | -5.016163 | 1.001025  | 0.161562  |
| 75  | 6  | 0 | -4.207559 | 0.076620  | -3.515793 |
| 76  | 1  | 0 | -2.148313 | 0.404935  | -2.993419 |
| 77  | 6  | 0 | -5.525747 | 0.065730  | -3.064159 |
| 78  | 1  | 0 | -6.839537 | 0.401931  | -1.391249 |
| 79  | 1  | 0 | -3.980645 | -0.176089 | -4.546141 |
| 80  | 1  | 0 | -6.329595 | -0.200519 | -3.742635 |
| 81  | 6  | 0 | 2.219503  | 1.945382  | 1.231523  |
| 82  | 6  | 0 | 2.515821  | 3.305897  | 1.343913  |
| 83  | 6  | 0 | 1.904254  | 1.206809  | 2.379173  |
| 84  | 6  | 0 | 2.481718  | 3.922260  | 2.594167  |
| 85  | 1  | 0 | 2.758068  | 3.887851  | 0.458885  |
| 86  | 6  | 0 | 1.882871  | 1.823604  | 3.624940  |
| 87  | 1  | 0 | 1.680912  | 0.145363  | 2.298488  |
| 88  | 6  | 0 | 2.162908  | 3.185796  | 3.732606  |
| 89  | 1  | 0 | 2.704629  | 4.981134  | 2.676058  |
| 90  | 1  | 0 | 1.636890  | 1.239496  | 4.506669  |
| 91  | 1  | 0 | 2.133131  | 3.672052  | 4.702175  |
| 92  | 6  | 0 | 0.723212  | -2.252532 | 1.505236  |
| 93  | 6  | 0 | 2.090745  | -2.504313 | 1.664384  |
| 94  | 6  | 0 | -0.031619 | -1.843195 | 2.614040  |
| 95  | 6  | 0 | 2.680805  | -2.391153 | 2.921915  |
| 96  | 1  | 0 | 2.704874  | -2.777510 | 0.809762  |
| 97  | 6  | 0 | 0.561569  | -1.740647 | 3.869023  |
| 98  | 1  | 0 | -1.083754 | -1.598879 | 2.497819  |
| 99  | 6  | 0 | 1.918815  | -2.018710 | 4.027122  |
| 100 | 1  | 0 | 3.743157  | -2.586190 | 3.029258  |
| 101 | 1  | 0 | -0.040121 | -1.428993 | 4.717498  |
| 102 | 1  | 0 | 2.382308  | -1.932242 | 5.004550  |
| 103 | 29 | 0 | -0.019317 | 0.113337  | -0.605013 |

---

## Cu<sup>+</sup>(PPh<sub>3</sub>)<sub>4</sub>

Standard orientation:

| Center<br>Number | Atomic<br>Number | Atomic<br>Type | Coordinates (Angstroms) |           |           |
|------------------|------------------|----------------|-------------------------|-----------|-----------|
|                  |                  |                | X                       | Y         | Z         |
| 1                | 15               | 0              | 1.974106                | -1.620080 | 0.189087  |
| 2                | 15               | 0              | 0.138528                | 1.697738  | 1.851556  |
| 3                | 6                | 0              | 1.481678                | -3.321957 | -0.309812 |
| 4                | 6                | 0              | 0.637550                | -4.070231 | 0.515345  |
| 5                | 6                | 0              | 1.814700                | -3.831660 | -1.589702 |
| 6                | 6                | 0              | 0.187829                | -5.318123 | 0.116938  |
| 7                | 1                | 0              | 0.350103                | -3.686460 | 1.499556  |
| 8                | 6                | 0              | 1.335605                | -5.083411 | -1.988382 |
| 9                | 1                | 0              | 2.443705                | -3.256188 | -2.258381 |
| 10               | 6                | 0              | 0.526690                | -5.830621 | -1.122915 |
| 11               | 1                | 0              | -0.441463               | -5.901469 | 0.781376  |
| 12               | 1                | 0              | 1.623081                | -5.469931 | -2.962039 |
| 13               | 6                | 0              | 3.532480                | -1.304753 | -0.741664 |
| 14               | 6                | 0              | 3.825031                | 0.001313  | -1.152227 |
| 15               | 6                | 0              | 4.489699                | -2.310602 | -0.963667 |
| 16               | 6                | 0              | 5.008930                | 0.288851  | -1.831861 |
| 17               | 1                | 0              | 3.121763                | 0.804494  | -0.945526 |
| 18               | 6                | 0              | 5.666273                | -2.020843 | -1.642638 |
| 19               | 1                | 0              | 4.301050                | -3.321538 | -0.611562 |
| 20               | 6                | 0              | 5.920454                | -0.721993 | -2.085224 |
| 21               | 6                | 0              | -1.007466               | 1.290091  | 3.236882  |
| 22               | 6                | 0              | -0.531448               | 0.593092  | 4.371372  |
| 23               | 6                | 0              | -2.381175               | 1.484790  | 3.129061  |
| 24               | 6                | 0              | -1.409853               | 0.139903  | 5.354028  |
| 25               | 1                | 0              | 0.529129                | 0.429769  | 4.498515  |
| 26               | 6                | 0              | -3.251870               | 1.007981  | 4.086805  |
| 27               | 1                | 0              | -2.806463               | 1.994254  | 2.276016  |
| 28               | 6                | 0              | -2.780349               | 0.342013  | 5.211374  |
| 29               | 6                | 0              | 1.706986                | 2.057636  | 2.715093  |
| 30               | 6                | 0              | 2.874015                | 1.536081  | 2.158161  |
| 31               | 6                | 0              | 1.774086                | 2.797079  | 3.903576  |
| 32               | 6                | 0              | 4.109381                | 1.760564  | 2.769030  |
| 33               | 1                | 0              | 2.812991                | 0.931092  | 1.245275  |
| 34               | 6                | 0              | 3.001850                | 3.012160  | 4.513987  |
| 35               | 1                | 0              | 0.868436                | 3.210898  | 4.339543  |
| 36               | 6                | 0              | 4.170560                | 2.501947  | 3.942302  |
| 37               | 1                | 0              | -3.470279               | -0.017082 | 5.969698  |
| 38               | 1                | 0              | 0.159467                | -6.808221 | -1.417179 |
| 39               | 1                | 0              | 6.845848                | -0.503405 | -2.608851 |
| 40               | 1                | 0              | 5.126229                | 2.682342  | 4.426353  |
| 41               | 1                | 0              | 6.387477                | -2.813583 | -1.819530 |
| 42               | 1                | 0              | 5.212297                | 1.306637  | -2.152027 |
| 43               | 1                | 0              | 3.046544                | 3.581924  | 5.435599  |

|    |    |   |           |           |           |
|----|----|---|-----------|-----------|-----------|
| 44 | 1  | 0 | 5.017313  | 1.359290  | 2.333436  |
| 45 | 1  | 0 | -1.019016 | -0.365946 | 6.233352  |
| 46 | 1  | 0 | -4.322616 | 1.155149  | 3.947980  |
| 47 | 15 | 0 | -2.083302 | -1.194794 | -0.000235 |
| 48 | 6  | 0 | -3.556480 | -0.133709 | 0.267522  |
| 49 | 6  | 0 | -4.569944 | -0.535741 | 1.140592  |
| 50 | 6  | 0 | -3.743988 | 1.017231  | -0.508379 |
| 51 | 6  | 0 | -5.720517 | 0.233345  | 1.298534  |
| 52 | 1  | 0 | -4.445945 | -1.440843 | 1.724478  |
| 53 | 6  | 0 | -4.928176 | 1.748652  | -0.400711 |
| 54 | 6  | 0 | -5.908531 | 1.371065  | 0.518436  |
| 55 | 1  | 0 | -6.485274 | -0.081803 | 1.999424  |
| 56 | 1  | 0 | -5.075005 | 2.605399  | -1.052833 |
| 57 | 6  | 0 | -2.546713 | -2.107691 | -1.519541 |
| 58 | 6  | 0 | -1.574432 | -2.915594 | -2.095227 |
| 59 | 6  | 0 | -3.806225 | -2.016409 | -2.131428 |
| 60 | 6  | 0 | -1.838035 | -3.642868 | -3.241671 |
| 61 | 6  | 0 | -4.078625 | -2.751539 | -3.282608 |
| 62 | 1  | 0 | -4.577932 | -1.388367 | -1.701202 |
| 63 | 6  | 0 | -3.095743 | -3.572472 | -3.840129 |
| 64 | 1  | 0 | -6.822446 | 1.944597  | 0.606988  |
| 65 | 1  | 0 | -3.300327 | -4.139161 | -4.741966 |
| 66 | 1  | 0 | -5.060111 | -2.669761 | -3.738905 |
| 67 | 1  | 0 | -1.051441 | -4.250139 | -3.672826 |
| 68 | 1  | 0 | -2.993102 | 1.350282  | -1.221841 |
| 69 | 1  | 0 | -0.585725 | -2.968061 | -1.639745 |
| 70 | 15 | 0 | 0.284959  | 1.308563  | -2.035245 |
| 71 | 6  | 0 | -1.313720 | 1.627983  | -2.889120 |
| 72 | 6  | 0 | -1.968878 | 0.565737  | -3.525962 |
| 73 | 6  | 0 | -1.968760 | 2.855624  | -2.800242 |
| 74 | 6  | 0 | -3.240749 | 0.725578  | -4.070527 |
| 75 | 1  | 0 | -1.494423 | -0.411384 | -3.581396 |
| 76 | 6  | 0 | -3.241196 | 3.019312  | -3.349534 |
| 77 | 6  | 0 | -3.879844 | 1.960251  | -3.984846 |
| 78 | 1  | 0 | -3.728299 | -0.119717 | -4.554684 |
| 79 | 1  | 0 | -3.735852 | 3.988828  | -3.298082 |
| 80 | 6  | 0 | 1.080087  | 2.962218  | -2.019851 |
| 81 | 6  | 0 | 0.879146  | 3.859490  | -3.073940 |
| 82 | 6  | 0 | 1.911360  | 3.346205  | -0.960182 |
| 83 | 6  | 0 | 1.515771  | 5.092468  | -3.083471 |
| 84 | 6  | 0 | 2.518572  | 4.599484  | -0.955986 |
| 85 | 1  | 0 | 2.076872  | 2.670096  | -0.117667 |
| 86 | 6  | 0 | 2.335784  | 5.462227  | -2.024699 |
| 87 | 1  | 0 | -4.864105 | 2.104883  | -4.416890 |
| 88 | 1  | 0 | 2.812349  | 6.438747  | -2.025754 |
| 89 | 1  | 0 | 3.134868  | 4.886779  | -0.109779 |
| 90 | 1  | 0 | 1.359066  | 5.778363  | -3.910932 |
| 91 | 1  | 0 | -1.508532 | 3.685050  | -2.281854 |
| 92 | 1  | 0 | 0.205227  | 3.601182  | -3.884848 |
| 93 | 6  | 0 | -0.473181 | 3.349635  | 1.288743  |

|     |    |   |           |           |           |
|-----|----|---|-----------|-----------|-----------|
| 94  | 6  | 0 | 0.150567  | 4.559243  | 1.574234  |
| 95  | 6  | 0 | -1.673382 | 3.350273  | 0.580063  |
| 96  | 6  | 0 | -0.418033 | 5.756074  | 1.145218  |
| 97  | 1  | 0 | 1.099875  | 4.563903  | 2.112626  |
| 98  | 6  | 0 | -2.268828 | 4.544206  | 0.196131  |
| 99  | 1  | 0 | -2.188120 | 2.431407  | 0.336345  |
| 100 | 6  | 0 | -1.637978 | 5.757152  | 0.470744  |
| 101 | 1  | 0 | 0.085156  | 6.692130  | 1.354287  |
| 102 | 1  | 0 | -3.221010 | 4.512540  | -0.317641 |
| 103 | 1  | 0 | -2.086845 | 6.692433  | 0.162425  |
| 104 | 6  | 0 | 2.542588  | -1.914269 | 1.910859  |
| 105 | 6  | 0 | 3.893185  | -2.057798 | 2.240446  |
| 106 | 6  | 0 | 1.579117  | -1.960917 | 2.921020  |
| 107 | 6  | 0 | 4.281906  | -2.224175 | 3.554390  |
| 108 | 1  | 0 | 4.657495  | -1.984763 | 1.471648  |
| 109 | 6  | 0 | 1.973747  | -2.136369 | 4.252357  |
| 110 | 1  | 0 | 0.520562  | -1.850243 | 2.684041  |
| 111 | 6  | 0 | 3.333719  | -2.260829 | 4.567556  |
| 112 | 1  | 0 | 5.335743  | -2.301486 | 3.793974  |
| 113 | 1  | 0 | 1.219655  | -2.171700 | 5.030811  |
| 114 | 1  | 0 | 3.651045  | -2.384812 | 5.596627  |
| 115 | 6  | 0 | -2.231108 | -2.484365 | 1.310616  |
| 116 | 6  | 0 | -2.709583 | -3.776276 | 1.059582  |
| 117 | 6  | 0 | -1.942313 | -2.111517 | 2.630335  |
| 118 | 6  | 0 | -2.854467 | -4.687266 | 2.107217  |
| 119 | 1  | 0 | -2.966716 | -4.081117 | 0.051715  |
| 120 | 6  | 0 | -2.052823 | -3.028705 | 3.663878  |
| 121 | 1  | 0 | -1.622935 | -1.089952 | 2.847453  |
| 122 | 6  | 0 | -2.509845 | -4.318055 | 3.408747  |
| 123 | 1  | 0 | -3.227154 | -5.684935 | 1.898960  |
| 124 | 1  | 0 | -1.792150 | -2.738590 | 4.676312  |
| 125 | 1  | 0 | -2.607008 | -5.031961 | 4.219226  |
| 126 | 6  | 0 | 1.263677  | 0.387470  | -3.333553 |
| 127 | 6  | 0 | 2.361072  | 0.933646  | -4.013184 |
| 128 | 6  | 0 | 0.985922  | -0.973723 | -3.537973 |
| 129 | 6  | 0 | 3.151230  | 0.148471  | -4.852148 |
| 130 | 1  | 0 | 2.650385  | 1.967621  | -3.836640 |
| 131 | 6  | 0 | 1.742610  | -1.746118 | -4.406911 |
| 132 | 1  | 0 | 0.192660  | -1.475972 | -3.014940 |
| 133 | 6  | 0 | 2.844315  | -1.189058 | -5.057937 |
| 134 | 1  | 0 | 4.016085  | 0.597944  | -5.331229 |
| 135 | 1  | 0 | 1.488997  | -2.795147 | -4.566264 |
| 136 | 1  | 0 | 3.459127  | -1.802239 | -5.707291 |
| 137 | 29 | 0 | 0.041787  | 0.001561  | 0.048582  |

---

## **Cu<sup>+</sup>(PPh<sub>2</sub>OH)**

Standard orientation:

| Center<br>Number | Atomic<br>Number | Atomic<br>Type | Coordinates (Angstroms) |           |           |
|------------------|------------------|----------------|-------------------------|-----------|-----------|
|                  |                  |                | X                       | Y         | Z         |
| 1                | 15               | 0              | -0.018834               | 0.684498  | 0.478455  |
| 2                | 6                | 0              | -1.514336               | -0.244916 | 0.075769  |
| 3                | 6                | 0              | -1.521980               | -1.169369 | -0.973498 |
| 4                | 6                | 0              | -2.691398               | 0.031447  | 0.778149  |
| 5                | 6                | 0              | -2.703138               | -1.824952 | -1.305782 |
| 6                | 1                | 0              | -0.608104               | -1.386090 | -1.519559 |
| 7                | 6                | 0              | -3.867498               | -0.632907 | 0.443921  |
| 8                | 1                | 0              | -2.681912               | 0.754257  | 1.588691  |
| 9                | 6                | 0              | -3.873451               | -1.559354 | -0.596668 |
| 10               | 6                | 0              | 1.354631                | -0.459291 | 0.233886  |
| 11               | 6                | 0              | 2.495711                | 0.061156  | -0.381343 |
| 12               | 6                | 0              | 1.334855                | -1.793904 | 0.656188  |
| 13               | 6                | 0              | 3.618284                | -0.736693 | -0.572656 |
| 14               | 1                | 0              | 2.483334                | 1.097179  | -0.710122 |
| 15               | 6                | 0              | 2.459567                | -2.588904 | 0.470128  |
| 16               | 1                | 0              | 0.441688                | -2.212991 | 1.111524  |
| 17               | 6                | 0              | 3.597879                | -2.060438 | -0.141194 |
| 18               | 1                | 0              | -4.791115               | -2.077003 | -0.855509 |
| 19               | 1                | 0              | 4.471011                | -2.688231 | -0.285900 |
| 20               | 1                | 0              | 2.450008                | -3.623348 | 0.796152  |
| 21               | 1                | 0              | 4.500597                | -0.329268 | -1.053743 |
| 22               | 1                | 0              | -2.708784               | -2.548407 | -2.114154 |
| 23               | 1                | 0              | -4.778660               | -0.426557 | 0.995252  |
| 24               | 29               | 0              | 0.375827                | 2.509942  | -0.568702 |
| 25               | 8                | 0              | -0.154005               | 1.004015  | 2.076187  |
| 26               | 1                | 0              | -0.297251               | 0.221307  | 2.631994  |

## **Cu<sup>+</sup>(PPh<sub>2</sub>OH)<sub>2</sub> (4)**

Standard orientation:

| Center<br>Number | Atomic<br>Number | Atomic<br>Type | Coordinates (Angstroms) |           |           |
|------------------|------------------|----------------|-------------------------|-----------|-----------|
|                  |                  |                | X                       | Y         | Z         |
| 1                | 15               | 0              | 1.859027                | -0.999970 | 1.111854  |
| 2                | 6                | 0              | 2.863713                | 0.145986  | 0.137321  |
| 3                | 6                | 0              | 4.040785                | 0.682035  | 0.664290  |
| 4                | 6                | 0              | 2.387911                | 0.580788  | -1.104688 |
| 5                | 6                | 0              | 4.748776                | 1.636922  | -0.061358 |
| 6                | 1                | 0              | 4.404822                | 0.340994  | 1.627789  |
| 7                | 6                | 0              | 3.094176                | 1.542773  | -1.818960 |



|    |    |   |           |           |           |
|----|----|---|-----------|-----------|-----------|
| 8  | 1  | 0 | 1.467955  | 0.167076  | -1.512978 |
| 9  | 6  | 0 | 4.275709  | 2.069564  | -1.298165 |
| 10 | 1  | 0 | 4.827717  | 2.817417  | -1.857879 |
| 11 | 1  | 0 | 5.670207  | 2.044208  | 0.341156  |
| 12 | 1  | 0 | 2.723376  | 1.880527  | -2.781014 |
| 13 | 15 | 0 | -1.808780 | 0.962702  | 1.112933  |
| 14 | 6  | 0 | -2.844665 | -0.170776 | 0.150338  |
| 15 | 6  | 0 | -2.511225 | -0.485337 | -1.171857 |
| 16 | 6  | 0 | -3.888621 | -0.847392 | 0.789027  |
| 17 | 6  | 0 | -3.234458 | -1.458509 | -1.854664 |
| 18 | 1  | 0 | -1.691382 | 0.028803  | -1.667802 |
| 19 | 6  | 0 | -4.612027 | -1.815340 | 0.098101  |
| 20 | 6  | 0 | -4.284696 | -2.121817 | -1.221256 |
| 21 | 1  | 0 | -2.977638 | -1.699799 | -2.880833 |
| 22 | 1  | 0 | -5.428463 | -2.332160 | 0.591129  |
| 23 | 1  | 0 | -4.846857 | -2.879697 | -1.756778 |
| 24 | 1  | 0 | -4.135685 | -0.612145 | 1.820168  |
| 25 | 6  | 0 | 1.356921  | -2.267073 | -0.075015 |
| 26 | 6  | 0 | 2.280189  | -2.914269 | -0.904950 |
| 27 | 6  | 0 | 0.002922  | -2.601848 | -0.139868 |
| 28 | 6  | 0 | 1.840698  | -3.891134 | -1.789357 |
| 29 | 1  | 0 | 3.331890  | -2.643857 | -0.862139 |
| 30 | 6  | 0 | -0.438290 | -3.571430 | -1.036978 |
| 31 | 1  | 0 | -0.704052 | -2.085698 | 0.505071  |
| 32 | 6  | 0 | 0.483267  | -4.216389 | -1.856037 |
| 33 | 1  | 0 | 2.551361  | -4.396756 | -2.434408 |
| 34 | 1  | 0 | -1.494481 | -3.813869 | -1.093377 |
| 35 | 1  | 0 | 0.145733  | -4.975020 | -2.554696 |
| 36 | 6  | 0 | -1.372710 | 2.284205  | -0.039789 |
| 37 | 6  | 0 | -2.303494 | 2.869557  | -0.907720 |
| 38 | 6  | 0 | -0.050896 | 2.737325  | -0.029236 |
| 39 | 6  | 0 | -1.908273 | 3.904768  | -1.745968 |
| 40 | 1  | 0 | -3.326510 | 2.503664  | -0.940064 |
| 41 | 6  | 0 | 0.346861  | 3.765555  | -0.878715 |
| 42 | 1  | 0 | 0.669897  | 2.262206  | 0.631916  |
| 43 | 6  | 0 | -0.585182 | 4.351603  | -1.730300 |
| 44 | 1  | 0 | -2.626993 | 4.359258  | -2.419308 |
| 45 | 1  | 0 | 1.379283  | 4.098716  | -0.876483 |
| 46 | 1  | 0 | -0.281207 | 5.155918  | -2.392136 |
| 47 | 29 | 0 | 0.027406  | -0.009993 | 1.885940  |
| 48 | 8  | 0 | -2.809836 | 1.573360  | 2.253406  |
| 49 | 1  | 0 | -3.603610 | 2.007052  | 1.902414  |
| 50 | 8  | 0 | 3.012512  | -1.657970 | 2.070015  |
| 51 | 1  | 0 | 2.650408  | -1.959744 | 2.913669  |

---

## Cu<sup>+</sup>(PPh<sub>2</sub>OH)<sub>3</sub>

Standard orientation:

| Center<br>Number | Atomic<br>Number | Atomic<br>Type | Coordinates (Angstroms) |           |           |
|------------------|------------------|----------------|-------------------------|-----------|-----------|
|                  |                  |                | X                       | Y         | Z         |
| 1                | 15               | 0              | -0.628532               | 2.176606  | -0.341080 |
| 2                | 15               | 0              | -1.549768               | -1.497083 | -0.273469 |
| 3                | 6                | 0              | -1.915172               | 2.985136  | -1.330721 |
| 4                | 6                | 0              | -3.059537               | 2.246832  | -1.659398 |
| 5                | 6                | 0              | -1.759658               | 4.285045  | -1.815532 |
| 6                | 6                | 0              | -4.054529               | 2.824467  | -2.442272 |
| 7                | 1                | 0              | -3.173882               | 1.226392  | -1.296066 |
| 8                | 6                | 0              | -2.754111               | 4.852394  | -2.608392 |
| 9                | 1                | 0              | -0.859983               | 4.848484  | -1.588852 |
| 10               | 6                | 0              | -3.901696               | 4.126110  | -2.917444 |
| 11               | 6                | 0              | -1.088806               | -2.126811 | 1.368067  |
| 12               | 6                | 0              | -1.363467               | -1.323282 | 2.480841  |
| 13               | 6                | 0              | -0.343798               | -3.301312 | 1.523031  |
| 14               | 6                | 0              | -0.918284               | -1.707498 | 3.742749  |
| 15               | 1                | 0              | -1.926774               | -0.400343 | 2.361364  |
| 16               | 6                | 0              | 0.095412                | -3.681361 | 2.788483  |
| 17               | 1                | 0              | -0.107936               | -3.916162 | 0.659515  |
| 18               | 6                | 0              | -0.192451               | -2.886637 | 3.898491  |
| 19               | 1                | 0              | 0.152124                | -3.186884 | 4.882909  |
| 20               | 1                | 0              | -4.673938               | 4.571140  | -3.536258 |
| 21               | 1                | 0              | -2.630174               | 5.861136  | -2.988074 |
| 22               | 1                | 0              | -4.944238               | 2.255215  | -2.690046 |
| 23               | 1                | 0              | -1.138157               | -1.080011 | 4.601048  |
| 24               | 1                | 0              | 0.661868                | -4.599059 | 2.908489  |
| 25               | 15               | 0              | 2.150710                | -0.567255 | -0.522065 |
| 26               | 6                | 0              | 3.525048                | -0.101557 | -1.605400 |
| 27               | 6                | 0              | 3.228439                | 0.369292  | -2.887261 |
| 28               | 6                | 0              | 4.861127                | -0.239505 | -1.207924 |
| 29               | 6                | 0              | 4.256479                | 0.707647  | -3.763970 |
| 30               | 6                | 0              | 5.885646                | 0.091128  | -2.086892 |
| 31               | 1                | 0              | 5.099076                | -0.590400 | -0.206487 |
| 32               | 6                | 0              | 5.582085                | 0.566056  | -3.363359 |
| 33               | 1                | 0              | 6.384145                | 0.828748  | -4.045408 |
| 34               | 1                | 0              | 6.919951                | -0.014661 | -1.777253 |
| 35               | 1                | 0              | 4.022890                | 1.078824  | -4.756074 |
| 36               | 1                | 0              | 2.191972                | 0.474216  | -3.198387 |
| 37               | 6                | 0              | -1.903285               | -2.972621 | -1.261960 |
| 38               | 6                | 0              | -2.622226               | -4.060649 | -0.750353 |
| 39               | 6                | 0              | -1.470522               | -2.991341 | -2.591243 |
| 40               | 6                | 0              | -2.906730               | -5.150370 | -1.564851 |
| 41               | 1                | 0              | -2.944431               | -4.063725 | 0.288089  |
| 42               | 6                | 0              | -1.750849               | -4.087485 | -3.403680 |
| 43               | 1                | 0              | -0.909486               | -2.148719 | -2.989120 |

|    |    |   |           |           |           |
|----|----|---|-----------|-----------|-----------|
| 44 | 6  | 0 | -2.470337 | -5.162770 | -2.890254 |
| 45 | 1  | 0 | -3.462741 | -5.992890 | -1.167355 |
| 46 | 1  | 0 | -1.409118 | -4.100878 | -4.433010 |
| 47 | 1  | 0 | -2.690803 | -6.017215 | -3.521831 |
| 48 | 6  | 0 | -1.232012 | 2.173036  | 1.378465  |
| 49 | 6  | 0 | -2.586871 | 2.200805  | 1.720001  |
| 50 | 6  | 0 | -0.263799 | 2.014128  | 2.378644  |
| 51 | 6  | 0 | -2.965741 | 2.080046  | 3.055218  |
| 52 | 1  | 0 | -3.345443 | 2.319715  | 0.952836  |
| 53 | 6  | 0 | -0.648211 | 1.899760  | 3.710474  |
| 54 | 1  | 0 | 0.791086  | 1.982478  | 2.115478  |
| 55 | 6  | 0 | -1.999840 | 1.929570  | 4.049949  |
| 56 | 1  | 0 | -4.017820 | 2.106910  | 3.319353  |
| 57 | 1  | 0 | 0.110438  | 1.775955  | 4.477132  |
| 58 | 1  | 0 | -2.302335 | 1.836008  | 5.088063  |
| 59 | 6  | 0 | 2.619600  | 0.070251  | 1.116024  |
| 60 | 6  | 0 | 3.253831  | 1.309594  | 1.261663  |
| 61 | 6  | 0 | 2.177379  | -0.623660 | 2.247621  |
| 62 | 6  | 0 | 3.468768  | 1.833059  | 2.533924  |
| 63 | 1  | 0 | 3.577484  | 1.863798  | 0.385120  |
| 64 | 6  | 0 | 2.393741  | -0.094159 | 3.517134  |
| 65 | 1  | 0 | 1.666254  | -1.576690 | 2.135306  |
| 66 | 6  | 0 | 3.040371  | 1.131957  | 3.661608  |
| 67 | 1  | 0 | 3.967947  | 2.789911  | 2.645748  |
| 68 | 1  | 0 | 2.049944  | -0.639684 | 4.390808  |
| 69 | 1  | 0 | 3.207304  | 1.545141  | 4.651281  |
| 70 | 29 | 0 | 0.000282  | 0.062275  | -0.836280 |
| 71 | 8  | 0 | -2.994100 | -0.757063 | 0.013440  |
| 72 | 1  | 0 | -3.640403 | -1.312293 | 0.476902  |
| 73 | 8  | 0 | 2.230349  | -2.198285 | -0.324069 |
| 74 | 1  | 0 | 3.070594  | -2.506806 | 0.050248  |
| 75 | 8  | 0 | 0.632702  | 3.225871  | -0.292659 |
| 76 | 1  | 0 | 0.462719  | 4.016378  | 0.243297  |

---

# **Cu<sup>+</sup>(PPh<sub>2</sub>OH)<sub>3</sub> -H<sup>+</sup>**

Standard orientation:

| Center<br>Number | Atomic<br>Number | Atomic<br>Type | Coordinates (Angstroms) |           |           |
|------------------|------------------|----------------|-------------------------|-----------|-----------|
|                  |                  |                | X                       | Y         | Z         |
| 1                | 15               | 0              | 1.591035                | -1.790703 | -0.472979 |
| 2                | 15               | 0              | 0.603366                | 2.050751  | -0.294972 |
| 3                | 6                | 0              | 3.128673                | -1.690746 | -1.481076 |
| 4                | 6                | 0              | 3.710568                | -0.465371 | -1.827680 |
| 5                | 6                | 0              | 3.685921                | -2.871972 | -1.974322 |
| 6                | 6                | 0              | 4.851019                | -0.427926 | -2.627046 |
| 7                | 1                | 0              | 3.273502                | 0.463329  | -1.460814 |
| 8                | 6                | 0              | 4.820975                | -2.835415 | -2.782466 |
| 9                | 1                | 0              | 3.207653                | -3.814096 | -1.720565 |
| 10               | 6                | 0              | 5.407531                | -1.613833 | -3.106409 |
| 11               | 6                | 0              | 0.000138                | 2.359904  | 1.395528  |
| 12               | 6                | 0              | 0.705971                | 1.765998  | 2.448551  |
| 13               | 6                | 0              | -1.199502               | 3.031626  | 1.654428  |
| 14               | 6                | 0              | 0.225730                | 1.862392  | 3.751616  |
| 15               | 1                | 0              | 1.629906                | 1.229554  | 2.245356  |
| 16               | 6                | 0              | -1.672714               | 3.128857  | 2.960669  |
| 17               | 1                | 0              | -1.763928               | 3.470973  | 0.837539  |
| 18               | 6                | 0              | -0.961581               | 2.545157  | 4.009472  |
| 19               | 1                | 0              | -1.336575               | 2.619917  | 5.025436  |
| 20               | 1                | 0              | 6.290831                | -1.584176 | -3.736972 |
| 21               | 1                | 0              | 5.246743                | -3.759273 | -3.163087 |
| 22               | 1                | 0              | 5.301904                | 0.526112  | -2.883994 |
| 23               | 1                | 0              | 0.778159                | 1.392282  | 4.559446  |
| 24               | 1                | 0              | -2.599069               | 3.657836  | 3.160299  |
| 25               | 15               | 0              | -2.077944               | -0.495144 | -0.416902 |
| 26               | 6                | 0              | -3.141647               | -1.522840 | -1.470749 |
| 27               | 6                | 0              | -2.684121               | -1.873996 | -2.742771 |
| 28               | 6                | 0              | -4.411825               | -1.938810 | -1.052455 |
| 29               | 6                | 0              | -3.486567               | -2.636323 | -3.589913 |
| 30               | 6                | 0              | -5.215425               | -2.690284 | -1.901249 |
| 31               | 1                | 0              | -4.765422               | -1.689199 | -0.054637 |
| 32               | 6                | 0              | -4.750883               | -3.039534 | -3.169920 |
| 33               | 1                | 0              | -5.376212               | -3.633334 | -3.828809 |
| 34               | 1                | 0              | -6.198441               | -3.012115 | -1.573784 |
| 35               | 1                | 0              | -3.124130               | -2.915043 | -4.573634 |
| 36               | 1                | 0              | -1.694321               | -1.559394 | -3.065138 |
| 37               | 6                | 0              | -0.008248               | 3.474642  | -1.245252 |
| 38               | 6                | 0              | 0.168135                | 4.795226  | -0.812869 |
| 39               | 6                | 0              | -0.661056               | 3.227464  | -2.455495 |
| 40               | 6                | 0              | -0.296780               | 5.851888  | -1.586806 |
| 41               | 1                | 0              | 0.653160                | 4.998050  | 0.139492  |
| 42               | 6                | 0              | -1.134987               | 4.286753  | -3.226891 |
| 43               | 1                | 0              | -0.803545               | 2.203095  | -2.792530 |

|    |    |   |           |           |           |
|----|----|---|-----------|-----------|-----------|
| 44 | 6  | 0 | -0.949061 | 5.596206  | -2.793871 |
| 45 | 1  | 0 | -0.158145 | 6.873468  | -1.248532 |
| 46 | 1  | 0 | -1.645030 | 4.089050  | -4.163672 |
| 47 | 1  | 0 | -1.314953 | 6.422506  | -3.394858 |
| 48 | 6  | 0 | 2.225138  | -1.396668 | 1.224815  |
| 49 | 6  | 0 | 3.394117  | -0.685794 | 1.516328  |
| 50 | 6  | 0 | 1.384384  | -1.766274 | 2.283292  |
| 51 | 6  | 0 | 3.718343  | -0.360238 | 2.833508  |
| 52 | 1  | 0 | 4.061923  | -0.386502 | 0.713891  |
| 53 | 6  | 0 | 1.703208  | -1.438309 | 3.598117  |
| 54 | 1  | 0 | 0.472672  | -2.320346 | 2.067363  |
| 55 | 6  | 0 | 2.873430  | -0.733340 | 3.878017  |
| 56 | 1  | 0 | 4.634563  | 0.183412  | 3.044895  |
| 57 | 1  | 0 | 1.034493  | -1.731525 | 4.402985  |
| 58 | 1  | 0 | 3.126848  | -0.478132 | 4.902806  |
| 59 | 6  | 0 | -2.156073 | -1.313816 | 1.206359  |
| 60 | 6  | 0 | -2.150543 | -2.708696 | 1.313673  |
| 61 | 6  | 0 | -2.047540 | -0.527193 | 2.357799  |
| 62 | 6  | 0 | -2.068832 | -3.308192 | 2.567230  |
| 63 | 1  | 0 | -2.199890 | -3.323670 | 0.419663  |
| 64 | 6  | 0 | -1.964834 | -1.132181 | 3.608962  |
| 65 | 1  | 0 | -2.024397 | 0.556683  | 2.276019  |
| 66 | 6  | 0 | -1.977029 | -2.521237 | 3.715512  |
| 67 | 1  | 0 | -2.068720 | -4.390219 | 2.647483  |
| 68 | 1  | 0 | -1.880322 | -0.513783 | 4.497801  |
| 69 | 1  | 0 | -1.907470 | -2.992373 | 4.690986  |
| 70 | 29 | 0 | 0.111234  | -0.102310 | -0.812137 |
| 71 | 8  | 0 | 2.229233  | 2.271794  | -0.131115 |
| 72 | 1  | 0 | 2.472676  | 3.083432  | 0.339252  |
| 73 | 8  | 0 | -2.919447 | 0.901292  | -0.154639 |
| 74 | 1  | 0 | -3.767561 | 0.764930  | 0.295489  |
| 75 | 8  | 0 | 1.075997  | -3.235684 | -0.481774 |

## Cu<sup>+</sup>(PPh<sub>2</sub>OH)<sub>3</sub>–H<sup>+</sup> O ligation

Standard orientation:

| Center<br>Number | Atomic<br>Number | Atomic<br>Type | Coordinates (Angstroms) |           |           |
|------------------|------------------|----------------|-------------------------|-----------|-----------|
|                  |                  |                | X                       | Y         | Z         |
| 1                | 15               | 0              | 2.087395                | 0.738887  | -2.867149 |
| 2                | 15               | 0              | -2.547047               | 0.559529  | -1.000732 |
| 3                | 6                | 0              | 3.148609                | -0.299496 | -1.737892 |
| 4                | 6                | 0              | 4.361393                | 0.167613  | -1.212000 |
| 5                | 6                | 0              | 2.781737                | -1.623693 | -1.480687 |
| 6                | 6                | 0              | 5.173370                | -0.659238 | -0.442020 |
| 7                | 1                | 0              | 4.667757                | 1.195461  | -1.390935 |
| 8                | 6                | 0              | 3.593426                | -2.457644 | -0.708164 |

|    |    |   |           |           |           |
|----|----|---|-----------|-----------|-----------|
| 9  | 1  | 0 | 1.841852  | -1.997182 | -1.880868 |
| 10 | 6  | 0 | 4.790454  | -1.977561 | -0.185012 |
| 11 | 6  | 0 | -2.790593 | 1.559839  | 0.504023  |
| 12 | 6  | 0 | -2.210455 | 2.833246  | 0.519590  |
| 13 | 6  | 0 | -3.411245 | 1.071083  | 1.657661  |
| 14 | 6  | 0 | -2.251919 | 3.610111  | 1.674407  |
| 15 | 1  | 0 | -1.725554 | 3.213582  | -0.376469 |
| 16 | 6  | 0 | -3.452761 | 1.851827  | 2.810862  |
| 17 | 1  | 0 | -3.853473 | 0.079726  | 1.654864  |
| 18 | 6  | 0 | -2.870294 | 3.118603  | 2.822349  |
| 19 | 1  | 0 | -2.901498 | 3.722776  | 3.723420  |
| 20 | 1  | 0 | 5.420296  | -2.622232 | 0.420346  |
| 21 | 1  | 0 | 3.280237  | -3.478389 | -0.503477 |
| 22 | 1  | 0 | 6.104456  | -0.274761 | -0.035458 |
| 23 | 1  | 0 | -1.802299 | 4.598527  | 1.676919  |
| 24 | 1  | 0 | -3.940058 | 1.470099  | 3.702367  |
| 25 | 15 | 0 | 0.009221  | -1.176385 | 0.813088  |
| 26 | 6  | 0 | 0.814150  | -2.784596 | 1.085401  |
| 27 | 6  | 0 | 0.533983  | -3.791091 | 0.153756  |
| 28 | 6  | 0 | 1.657015  | -3.061221 | 2.165082  |
| 29 | 6  | 0 | 1.088475  | -5.058847 | 0.299779  |
| 30 | 6  | 0 | 2.222853  | -4.326294 | 2.303037  |
| 31 | 1  | 0 | 1.884810  | -2.284656 | 2.889594  |
| 32 | 6  | 0 | 1.938720  | -5.324067 | 1.372933  |
| 33 | 1  | 0 | 2.382863  | -6.308307 | 1.481901  |
| 34 | 1  | 0 | 2.885306  | -4.533640 | 3.137178  |
| 35 | 1  | 0 | 0.871245  | -5.833846 | -0.427860 |
| 36 | 1  | 0 | -0.102422 | -3.574577 | -0.702283 |
| 37 | 6  | 0 | -3.941735 | -0.604844 | -0.985897 |
| 38 | 6  | 0 | -5.265025 | -0.193375 | -0.786279 |
| 39 | 6  | 0 | -3.667087 | -1.954986 | -1.217231 |
| 40 | 6  | 0 | -6.298400 | -1.122336 | -0.824713 |
| 41 | 1  | 0 | -5.487093 | 0.852374  | -0.585639 |
| 42 | 6  | 0 | -4.701406 | -2.887503 | -1.246179 |
| 43 | 1  | 0 | -2.638609 | -2.274476 | -1.370837 |
| 44 | 6  | 0 | -6.015164 | -2.469525 | -1.053783 |
| 45 | 1  | 0 | -7.323082 | -0.800013 | -0.671533 |
| 46 | 1  | 0 | -4.482218 | -3.935171 | -1.422819 |
| 47 | 1  | 0 | -6.822976 | -3.193849 | -1.080370 |
| 48 | 6  | 0 | 2.065641  | 2.244559  | -1.774010 |
| 49 | 6  | 0 | 3.047290  | 3.225913  | -1.947811 |
| 50 | 6  | 0 | 1.116648  | 2.428366  | -0.767247 |
| 51 | 6  | 0 | 3.107802  | 4.335040  | -1.105201 |
| 52 | 1  | 0 | 3.773494  | 3.120486  | -2.751722 |
| 53 | 6  | 0 | 1.167476  | 3.533162  | 0.076644  |
| 54 | 1  | 0 | 0.326437  | 1.691058  | -0.635946 |
| 55 | 6  | 0 | 2.171147  | 4.487141  | -0.085656 |
| 56 | 1  | 0 | 3.881017  | 5.083687  | -1.249596 |
| 57 | 1  | 0 | 0.433974  | 3.636908  | 0.870695  |
| 58 | 1  | 0 | 2.215340  | 5.349229  | 0.572692  |

|    |    |   |           |           |           |
|----|----|---|-----------|-----------|-----------|
| 59 | 6  | 0 | 0.925411  | 0.022648  | 1.823135  |
| 60 | 6  | 0 | 2.315133  | 0.136935  | 1.695073  |
| 61 | 6  | 0 | 0.215017  | 0.964708  | 2.572892  |
| 62 | 6  | 0 | 2.987243  | 1.168701  | 2.342021  |
| 63 | 1  | 0 | 2.870500  | -0.575455 | 1.088851  |
| 64 | 6  | 0 | 0.896626  | 1.990647  | 3.224244  |
| 65 | 1  | 0 | -0.868310 | 0.901851  | 2.640484  |
| 66 | 6  | 0 | 2.280899  | 2.093710  | 3.110327  |
| 67 | 1  | 0 | 4.064609  | 1.252356  | 2.236087  |
| 68 | 1  | 0 | 0.338701  | 2.717357  | 3.807476  |
| 69 | 1  | 0 | 2.808338  | 2.900298  | 3.609735  |
| 70 | 29 | 0 | -0.416860 | -0.254304 | -1.188428 |
| 71 | 8  | 0 | -2.880036 | 1.656251  | -2.186094 |
| 72 | 1  | 0 | -3.710355 | 2.138216  | -2.053759 |
| 73 | 8  | 0 | -1.431641 | -1.325069 | 1.613163  |
| 74 | 1  | 0 | -1.328320 | -1.574223 | 2.544635  |
| 75 | 8  | 0 | 0.640909  | 0.093307  | -2.746064 |

## Cu<sup>+</sup>(PPh<sub>2</sub>OH)<sub>4</sub>

Standard orientation:

| Center<br>Number | Atomic<br>Number | Atomic<br>Type | Coordinates (Angstroms) |           |           |
|------------------|------------------|----------------|-------------------------|-----------|-----------|
|                  |                  |                | X                       | Y         | Z         |
| 1                | 15               | 0              | -1.109254               | -1.717030 | -1.271546 |
| 2                | 15               | 0              | -0.212721               | -0.200313 | 2.146173  |
| 3                | 6                | 0              | -0.068512               | -3.185575 | -1.520264 |
| 4                | 6                | 0              | 0.582704                | -3.717666 | -0.398887 |
| 5                | 6                | 0              | 0.171920                | -3.725401 | -2.784548 |
| 6                | 6                | 0              | 1.435601                | -4.806611 | -0.541353 |
| 7                | 1                | 0              | 0.434495                | -3.271184 | 0.584533  |
| 8                | 6                | 0              | 1.038708                | -4.807463 | -2.923363 |
| 9                | 1                | 0              | -0.301881               | -3.295881 | -3.662044 |
| 10               | 6                | 0              | 1.665122                | -5.350460 | -1.804405 |
| 11               | 6                | 0              | -1.814509               | 0.395897  | 2.783641  |
| 12               | 6                | 0              | -2.934333               | -0.406689 | 2.527779  |
| 13               | 6                | 0              | -1.978302               | 1.642605  | 3.394468  |
| 14               | 6                | 0              | -4.203560               | 0.031292  | 2.893355  |
| 15               | 1                | 0              | -2.814325               | -1.372943 | 2.041636  |
| 16               | 6                | 0              | -3.253017               | 2.079445  | 3.748604  |
| 17               | 1                | 0              | -1.118014               | 2.272402  | 3.597694  |
| 18               | 6                | 0              | -4.364820               | 1.276169  | 3.500061  |
| 19               | 1                | 0              | -5.355549               | 1.620493  | 3.779206  |
| 20               | 1                | 0              | 2.345083                | -6.188864 | -1.917003 |
| 21               | 1                | 0              | 1.226158                | -5.223664 | -3.907878 |
| 22               | 1                | 0              | 1.942589                | -5.210642 | 0.328814  |
| 23               | 1                | 0              | -5.064872               | -0.597332 | 2.690255  |

|    |    |   |           |           |           |
|----|----|---|-----------|-----------|-----------|
| 24 | 1  | 0 | -3.376686 | 3.047153  | 4.223683  |
| 25 | 15 | 0 | -0.943400 | 1.997736  | -0.782404 |
| 26 | 6  | 0 | -0.187195 | 2.766740  | -2.243793 |
| 27 | 6  | 0 | 0.059338  | 1.948695  | -3.354150 |
| 28 | 6  | 0 | 0.265732  | 4.087305  | -2.235913 |
| 29 | 6  | 0 | 0.734097  | 2.462724  | -4.457621 |
| 30 | 6  | 0 | 0.950745  | 4.592842  | -3.338129 |
| 31 | 1  | 0 | 0.109556  | 4.714008  | -1.363137 |
| 32 | 6  | 0 | 1.184670  | 3.782590  | -4.447744 |
| 33 | 1  | 0 | 1.723380  | 4.177384  | -5.303083 |
| 34 | 1  | 0 | 1.307765  | 5.617585  | -3.327231 |
| 35 | 1  | 0 | 0.923708  | 1.828716  | -5.317601 |
| 36 | 1  | 0 | -0.261864 | 0.907401  | -3.349073 |
| 37 | 15 | 0 | 2.214241  | -0.169793 | -0.852632 |
| 38 | 6  | 0 | 3.239776  | 1.292369  | -0.481838 |
| 39 | 6  | 0 | 3.179196  | 2.379815  | -1.362753 |
| 40 | 6  | 0 | 3.969027  | 1.401966  | 0.705464  |
| 41 | 6  | 0 | 3.860957  | 3.556256  | -1.064517 |
| 42 | 1  | 0 | 2.602642  | 2.306728  | -2.282328 |
| 43 | 6  | 0 | 4.646156  | 2.582224  | 0.998528  |
| 44 | 6  | 0 | 4.594701  | 3.658988  | 0.115833  |
| 45 | 1  | 0 | 3.811341  | 4.392611  | -1.754996 |
| 46 | 1  | 0 | 5.211509  | 2.659194  | 1.921889  |
| 47 | 6  | 0 | 3.179856  | -1.588229 | -0.240461 |
| 48 | 6  | 0 | 3.951101  | -2.379414 | -1.093354 |
| 49 | 6  | 0 | 3.074598  | -1.930799 | 1.112574  |
| 50 | 6  | 0 | 4.634037  | -3.484167 | -0.590719 |
| 51 | 6  | 0 | 3.770590  | -3.025039 | 1.615832  |
| 52 | 1  | 0 | 2.439322  | -1.348084 | 1.776228  |
| 53 | 6  | 0 | 4.553088  | -3.802164 | 0.763002  |
| 54 | 1  | 0 | 5.124842  | 4.576895  | 0.348243  |
| 55 | 1  | 0 | 5.087953  | -4.663131 | 1.151122  |
| 56 | 1  | 0 | 3.691330  | -3.277095 | 2.668560  |
| 57 | 1  | 0 | 5.226970  | -4.100543 | -1.258768 |
| 58 | 1  | 0 | 4.012664  | 0.571295  | 1.405754  |
| 59 | 1  | 0 | 4.002978  | -2.152332 | -2.153724 |
| 60 | 6  | 0 | 1.054602  | 0.658386  | 3.129689  |
| 61 | 6  | 0 | 1.795537  | -0.007405 | 4.109626  |
| 62 | 6  | 0 | 1.347454  | 1.993566  | 2.822028  |
| 63 | 6  | 0 | 2.810247  | 0.662094  | 4.789909  |
| 64 | 1  | 0 | 1.594571  | -1.052006 | 4.329934  |
| 65 | 6  | 0 | 2.348516  | 2.662663  | 3.520141  |
| 66 | 1  | 0 | 0.797717  | 2.508133  | 2.034689  |
| 67 | 6  | 0 | 3.082009  | 1.997646  | 4.500930  |
| 68 | 1  | 0 | 3.386736  | 0.139941  | 5.546415  |
| 69 | 1  | 0 | 2.572155  | 3.696967  | 3.279612  |
| 70 | 1  | 0 | 3.872541  | 2.517139  | 5.032693  |
| 71 | 6  | 0 | -2.668657 | -2.330403 | -0.556428 |
| 72 | 6  | 0 | -2.733323 | -3.462855 | 0.261170  |
| 73 | 6  | 0 | -3.802251 | -1.525201 | -0.719189 |



|     |    |   |           |           |           |
|-----|----|---|-----------|-----------|-----------|
| 74  | 6  | 0 | -3.922263 | -3.780669 | 0.913848  |
| 75  | 1  | 0 | -1.863037 | -4.098654 | 0.390534  |
| 76  | 6  | 0 | -4.989706 | -1.853440 | -0.072555 |
| 77  | 1  | 0 | -3.754275 | -0.639348 | -1.347691 |
| 78  | 6  | 0 | -5.049431 | -2.976916 | 0.750916  |
| 79  | 1  | 0 | -3.967997 | -4.660676 | 1.547017  |
| 80  | 1  | 0 | -5.862571 | -1.220988 | -0.204772 |
| 81  | 1  | 0 | -5.972869 | -3.227850 | 1.262996  |
| 82  | 6  | 0 | -2.732334 | 1.935653  | -1.125191 |
| 83  | 6  | 0 | -3.258119 | 1.795333  | -2.413070 |
| 84  | 6  | 0 | -3.587478 | 1.909587  | -0.016692 |
| 85  | 6  | 0 | -4.631147 | 1.636339  | -2.586440 |
| 86  | 1  | 0 | -2.603345 | 1.812163  | -3.278881 |
| 87  | 6  | 0 | -4.958879 | 1.757225  | -0.197003 |
| 88  | 1  | 0 | -3.178892 | 2.007408  | 0.986519  |
| 89  | 6  | 0 | -5.481991 | 1.616951  | -1.481294 |
| 90  | 1  | 0 | -5.038427 | 1.531280  | -3.586693 |
| 91  | 1  | 0 | -5.612992 | 1.737229  | 0.669320  |
| 92  | 1  | 0 | -6.550943 | 1.492994  | -1.623016 |
| 93  | 29 | 0 | -0.013300 | -0.026098 | -0.144383 |
| 94  | 8  | 0 | -1.548251 | -1.206232 | -2.773411 |
| 95  | 1  | 0 | -2.158712 | -1.803749 | -3.232555 |
| 96  | 8  | 0 | -0.845998 | 3.121452  | 0.416610  |
| 97  | 1  | 0 | -1.427587 | 3.886655  | 0.286989  |
| 98  | 8  | 0 | -0.164746 | -1.766604 | 2.652278  |
| 99  | 1  | 0 | -0.485400 | -1.896361 | 3.558722  |
| 100 | 8  | 0 | 2.300308  | -0.277732 | -2.491305 |
| 101 | 1  | 0 | 3.182894  | -0.090469 | -2.847048 |

## **Cu<sup>+</sup>(Ph<sub>2</sub>POH)(NEt<sub>3</sub>) (8)**

Standard orientation:

| Center<br>Number | Atomic<br>Number | Atomic<br>Type | Coordinates (Angstroms) |           |           |
|------------------|------------------|----------------|-------------------------|-----------|-----------|
|                  |                  |                | X                       | Y         | Z         |
| 1                | 6                | 0              | 3.300499                | -1.874278 | -0.065028 |
| 2                | 6                | 0              | 4.759103                | -2.245240 | -0.303598 |
| 3                | 29               | 0              | 1.037660                | -0.317203 | 0.277887  |
| 4                | 1                | 0              | 2.981823                | -2.250059 | 0.912661  |
| 5                | 1                | 0              | 2.670462                | -2.362184 | -0.815104 |
| 6                | 1                | 0              | 5.434971                | -1.704096 | 0.363870  |
| 7                | 1                | 0              | 4.882892                | -3.312730 | -0.106911 |
| 8                | 1                | 0              | 5.061470                | -2.064639 | -1.337061 |
| 9                | 6                | 0              | 3.578542                | 0.310429  | 1.045331  |
| 10               | 1                | 0              | 3.446408                | -0.305778 | 1.940089  |
| 11               | 1                | 0              | 4.655249                | 0.431679  | 0.890341  |
| 12               | 6                | 0              | 2.905244                | 1.658998  | 1.251201  |

|    |    |   |           |           |           |
|----|----|---|-----------|-----------|-----------|
| 13 | 1  | 0 | 3.018376  | 2.317107  | 0.384669  |
| 14 | 1  | 0 | 1.833405  | 1.514557  | 1.432090  |
| 15 | 1  | 0 | 3.324917  | 2.170468  | 2.118569  |
| 16 | 6  | 0 | 3.214379  | 0.223264  | -1.408289 |
| 17 | 1  | 0 | 2.959029  | -0.520818 | -2.168682 |
| 18 | 1  | 0 | 2.499386  | 1.044418  | -1.527564 |
| 19 | 6  | 0 | 4.616190  | 0.777834  | -1.650462 |
| 20 | 1  | 0 | 5.400391  | 0.034548  | -1.504818 |
| 21 | 1  | 0 | 4.668863  | 1.125885  | -2.684625 |
| 22 | 1  | 0 | 4.831306  | 1.633925  | -1.006245 |
| 23 | 7  | 0 | 2.957174  | -0.425011 | -0.084731 |
| 24 | 15 | 0 | -1.085843 | -0.083202 | 0.735032  |
| 25 | 6  | 0 | -1.672049 | 1.534925  | 0.181795  |
| 26 | 6  | 0 | -0.700365 | 2.451622  | -0.228649 |
| 27 | 6  | 0 | -3.022904 | 1.902260  | 0.184411  |
| 28 | 6  | 0 | -1.067267 | 3.731162  | -0.632604 |
| 29 | 1  | 0 | 0.341965  | 2.142833  | -0.229728 |
| 30 | 6  | 0 | -3.387596 | 3.183235  | -0.213432 |
| 31 | 1  | 0 | -3.785250 | 1.187195  | 0.482799  |
| 32 | 6  | 0 | -2.411398 | 4.094417  | -0.620277 |
| 33 | 1  | 0 | -0.310757 | 4.438247  | -0.954937 |
| 34 | 1  | 0 | -4.433055 | 3.472373  | -0.212772 |
| 35 | 1  | 0 | -2.703665 | 5.091288  | -0.933320 |
| 36 | 6  | 0 | -2.269832 | -1.277622 | 0.061061  |
| 37 | 6  | 0 | -2.777134 | -1.125959 | -1.233979 |
| 38 | 6  | 0 | -2.604176 | -2.404578 | 0.817943  |
| 39 | 6  | 0 | -3.626743 | -2.093650 | -1.760287 |
| 40 | 1  | 0 | -2.520037 | -0.250509 | -1.824030 |
| 41 | 6  | 0 | -3.460010 | -3.365576 | 0.286998  |
| 42 | 1  | 0 | -2.202404 | -2.522266 | 1.819933  |
| 43 | 6  | 0 | -3.970165 | -3.210602 | -1.000028 |
| 44 | 1  | 0 | -4.026969 | -1.972720 | -2.761220 |
| 45 | 1  | 0 | -3.727692 | -4.234922 | 0.877993  |
| 46 | 1  | 0 | -4.637720 | -3.960177 | -1.411834 |
| 47 | 8  | 0 | -1.298196 | -0.167900 | 2.355529  |
| 48 | 1  | 0 | -2.208421 | -0.002280 | 2.647889  |

-----

## $\text{Cu}^{3+}(\text{Ph}_2\text{POH})(\text{NEt}_3)$

Standard orientation:

| Center<br>Number | Atomic<br>Number | Atomic<br>Type | Coordinates (Angstroms) |           |           |
|------------------|------------------|----------------|-------------------------|-----------|-----------|
|                  |                  |                | X                       | Y         | Z         |
| 1                | 6                | 0              | 3.081339                | -0.100064 | -0.356193 |
| 2                | 6                | 0              | 4.397568                | 0.352752  | -0.982291 |
| 3                | 29               | 0              | 0.837506                | -0.529627 | -0.121806 |
| 4                | 1                | 0              | 3.291156                | -0.671287 | 0.552502  |
| 5                | 1                | 0              | 2.607263                | -0.783971 | -1.102027 |
| 6                | 1                | 0              | 4.914803                | 1.045270  | -0.315435 |
| 7                | 1                | 0              | 5.023888                | -0.531244 | -1.108379 |
| 8                | 1                | 0              | 4.251156                | 0.811139  | -1.959809 |
| 9                | 6                | 0              | 2.381053                | 1.594382  | 1.308536  |
| 10               | 1                | 0              | 2.576473                | 0.798209  | 2.030720  |
| 11               | 1                | 0              | 3.311917                | 2.159049  | 1.186031  |
| 12               | 6                | 0              | 1.268694                | 2.494917  | 1.806807  |
| 13               | 1                | 0              | 1.011525                | 3.285193  | 1.098922  |
| 14               | 1                | 0              | 0.372607                | 1.911996  | 2.036583  |
| 15               | 1                | 0              | 1.588172                | 2.967301  | 2.736961  |
| 16               | 6                | 0              | 1.815775                | 1.932382  | -1.115400 |
| 17               | 1                | 0              | 1.865067                | 1.366490  | -2.050509 |
| 18               | 1                | 0              | 0.790176                | 2.291822  | -1.005070 |
| 19               | 6                | 0              | 2.754844                | 3.134317  | -1.167173 |
| 20               | 1                | 0              | 3.804156                | 2.858198  | -1.257184 |
| 21               | 1                | 0              | 2.484264                | 3.715216  | -2.051103 |
| 22               | 1                | 0              | 2.636944                | 3.784739  | -0.299189 |
| 23               | 7                | 0              | 2.075807                | 0.950929  | -0.002228 |
| 24               | 15               | 0              | -1.137989               | -0.294538 | 0.934744  |
| 25               | 6                | 0              | -2.316342               | 0.710636  | 0.160133  |
| 26               | 6                | 0              | -2.333833               | 2.100756  | 0.410765  |
| 27               | 6                | 0              | -3.237746               | 0.093405  | -0.718110 |
| 28               | 6                | 0              | -3.295957               | 2.868788  | -0.217316 |
| 29               | 1                | 0              | -1.609516               | 2.561881  | 1.073837  |
| 30               | 6                | 0              | -4.189084               | 0.890673  | -1.328769 |
| 31               | 1                | 0              | -3.236089               | -0.979506 | -0.879792 |
| 32               | 6                | 0              | -4.214250               | 2.266519  | -1.083574 |
| 33               | 1                | 0              | -3.331208               | 3.936573  | -0.039137 |
| 34               | 1                | 0              | -4.920207               | 0.440687  | -1.989539 |
| 35               | 1                | 0              | -4.963559               | 2.879347  | -1.572765 |
| 36               | 6                | 0              | -0.771296               | -1.897595 | 0.329988  |
| 37               | 6                | 0              | -0.579233               | -2.029970 | -1.081705 |
| 38               | 6                | 0              | -0.473217               | -2.961613 | 1.220072  |
| 39               | 6                | 0              | -0.133531               | -3.247929 | -1.580187 |
| 40               | 1                | 0              | -0.882248               | -1.244185 | -1.774961 |
| 41               | 6                | 0              | -0.055380               | -4.163632 | 0.683121  |
| 42               | 1                | 0              | -0.597412               | -2.832604 | 2.289960  |
| 43               | 6                | 0              | 0.119213                | -4.304425 | -0.703255 |

|    |   |   |           |           |           |
|----|---|---|-----------|-----------|-----------|
| 44 | 1 | 0 | -0.002053 | -3.374425 | -2.648043 |
| 45 | 1 | 0 | 0.141087  | -5.002913 | 1.339993  |
| 46 | 1 | 0 | 0.457634  | -5.255018 | -1.100884 |
| 47 | 8 | 0 | -0.890595 | -0.211825 | 2.472510  |
| 48 | 1 | 0 | -1.521411 | 0.271607  | 3.042364  |

## **Cu<sup>+</sup>(NEt<sub>3</sub>)<sub>2</sub> (9)**

Standard orientation:

| Center<br>Number | Atomic<br>Number | Atomic<br>Type | Coordinates (Angstroms) |           |           |
|------------------|------------------|----------------|-------------------------|-----------|-----------|
|                  |                  |                | X                       | Y         | Z         |
| 1                | 6                | 0              | 2.392767                | -0.748831 | -1.034869 |
| 2                | 6                | 0              | -2.348945               | 1.277683  | 0.882055  |
| 3                | 6                | 0              | -3.843304               | 1.501653  | 1.080775  |
| 4                | 29               | 0              | -0.002695               | 0.193075  | -0.006458 |
| 5                | 1                | 0              | -1.867588               | 1.122832  | 1.852995  |
| 6                | 1                | 0              | -1.902814               | 2.175232  | 0.442911  |
| 7                | 1                | 0              | -4.357780               | 0.598037  | 1.417552  |
| 8                | 1                | 0              | -3.977838               | 2.265273  | 1.850460  |
| 9                | 1                | 0              | -4.323901               | 1.865775  | 0.170775  |
| 10               | 6                | 0              | -2.282361               | -1.174914 | 0.655843  |
| 11               | 1                | 0              | -1.959020               | -1.122775 | 1.700739  |
| 12               | 1                | 0              | -3.367333               | -1.323236 | 0.662294  |
| 13               | 6                | 0              | -1.591290               | -2.337308 | -0.041733 |
| 14               | 1                | 0              | -1.922628               | -2.455465 | -1.076289 |
| 15               | 1                | 0              | -0.507565               | -2.179537 | -0.048780 |
| 16               | 1                | 0              | -1.795429               | -3.269834 | 0.487096  |
| 17               | 6                | 0              | -2.422446               | 0.232931  | -1.380138 |
| 18               | 1                | 0              | -2.346950               | 1.290583  | -1.650227 |
| 19               | 1                | 0              | -1.713529               | -0.304498 | -2.017825 |
| 20               | 6                | 0              | -3.824575               | -0.294882 | -1.674753 |
| 21               | 1                | 0              | -4.594567               | 0.159598  | -1.051466 |
| 22               | 1                | 0              | -4.058484               | -0.068756 | -2.717704 |
| 23               | 1                | 0              | -3.884098               | -1.379203 | -1.554195 |
| 24               | 7                | 0              | -1.934584               | 0.125350  | 0.030212  |
| 25               | 7                | 0              | 1.930002                | 0.234237  | -0.005229 |
| 26               | 1                | 0              | 2.274687                | -0.256073 | -2.004556 |
| 27               | 1                | 0              | 1.694216                | -1.591577 | -1.027945 |
| 28               | 6                | 0              | 3.807224                | -1.303810 | -0.885345 |
| 29               | 1                | 0              | 3.902440                | -1.940667 | -0.002432 |
| 30               | 1                | 0              | 4.021590                | -1.922845 | -1.759565 |
| 31               | 1                | 0              | 4.569153                | -0.526290 | -0.829230 |
| 32               | 6                | 0              | 2.301257                | 1.640049  | -0.337897 |
| 33               | 1                | 0              | 1.844062                | 2.266400  | 0.434556  |
| 34               | 1                | 0              | 1.804765                | 1.883378  | -1.282149 |
| 35               | 6                | 0              | 3.786749                | 1.962877  | -0.445114 |

|    |   |   |          |           |           |
|----|---|---|----------|-----------|-----------|
| 36 | 1 | 0 | 3.898870 | 3.045951  | -0.535281 |
| 37 | 1 | 0 | 4.343606 | 1.644276  | 0.439835  |
| 38 | 1 | 0 | 4.238634 | 1.511321  | -1.330280 |
| 39 | 6 | 0 | 2.354340 | -0.137981 | 1.368147  |
| 40 | 1 | 0 | 3.443435 | -0.233999 | 1.422964  |
| 41 | 1 | 0 | 2.066823 | 0.687714  | 2.025939  |
| 42 | 6 | 0 | 1.682212 | -1.420909 | 1.832421  |
| 43 | 1 | 0 | 1.936532 | -2.275286 | 1.198727  |
| 44 | 1 | 0 | 1.987876 | -1.659404 | 2.852428  |
| 45 | 1 | 0 | 0.593303 | -1.302550 | 1.824685  |

## $\text{Cu}^{3+}(\text{NEt}_3)_2$

Standard orientation:

| Center<br>Number | Atomic<br>Number | Atomic<br>Type | Coordinates (Angstroms) |           |           |
|------------------|------------------|----------------|-------------------------|-----------|-----------|
|                  |                  |                | X                       | Y         | Z         |
| 1                | 6                | 0              | 1.937710                | -0.096420 | -1.258985 |
| 2                | 6                | 0              | -1.765365               | 1.112612  | 1.238312  |
| 3                | 6                | 0              | -3.213175               | 1.621749  | 1.312743  |
| 4                | 29               | 0              | 0.058923                | -0.876879 | 0.168890  |
| 5                | 1                | 0              | -1.494016               | 0.606993  | 2.168507  |
| 6                | 1                | 0              | -1.102567               | 1.959693  | 1.065299  |
| 7                | 1                | 0              | -3.928291               | 0.809053  | 1.450292  |
| 8                | 1                | 0              | -3.255908               | 2.269755  | 2.190340  |
| 9                | 1                | 0              | -3.475255               | 2.218942  | 0.440230  |
| 10               | 6                | 0              | -2.289062               | -1.140880 | 0.314094  |
| 11               | 1                | 0              | -2.312546               | -1.352842 | 1.385382  |
| 12               | 1                | 0              | -3.315916               | -1.031821 | -0.045729 |
| 13               | 6                | 0              | -1.609479               | -2.284786 | -0.473333 |
| 14               | 1                | 0              | -1.530914               | -2.101507 | -1.547329 |
| 15               | 1                | 0              | -0.643312               | -2.669538 | -0.074347 |
| 16               | 1                | 0              | -2.226137               | -3.175373 | -0.328031 |
| 17               | 6                | 0              | -1.711775               | 0.770377  | -1.257981 |
| 18               | 1                | 0              | -1.493175               | 1.831674  | -1.137470 |
| 19               | 1                | 0              | -0.952628               | 0.337741  | -1.922037 |
| 20               | 6                | 0              | -3.079262               | 0.570598  | -1.914241 |
| 21               | 1                | 0              | -3.896232               | 0.933829  | -1.290822 |
| 22               | 1                | 0              | -3.061233               | 1.160873  | -2.831977 |
| 23               | 1                | 0              | -3.258564               | -0.468845 | -2.192087 |
| 24               | 7                | 0              | -1.578526               | 0.155371  | 0.112357  |
| 25               | 7                | 0              | 1.516147                | 0.372702  | 0.101396  |
| 26               | 1                | 0              | 1.565867                | 0.636846  | -1.975584 |
| 27               | 1                | 0              | 1.443450                | -1.061115 | -1.488663 |
| 28               | 6                | 0              | 3.439951                | -0.349815 | -1.419575 |
| 29               | 1                | 0              | 3.782619                | -1.211917 | -0.847565 |
| 30               | 1                | 0              | 3.599183                | -0.563576 | -2.477484 |

|    |   |   |          |           |           |
|----|---|---|----------|-----------|-----------|
| 31 | 1 | 0 | 4.023111 | 0.530040  | -1.149688 |
| 32 | 6 | 0 | 1.334411 | 1.836970  | 0.219514  |
| 33 | 1 | 0 | 0.973904 | 2.046226  | 1.226388  |
| 34 | 1 | 0 | 0.603795 | 2.154388  | -0.528041 |
| 35 | 6 | 0 | 2.653512 | 2.589556  | -0.023372 |
| 36 | 1 | 0 | 2.434498 | 3.643206  | 0.159168  |
| 37 | 1 | 0 | 3.436150 | 2.276842  | 0.669372  |
| 38 | 1 | 0 | 2.991208 | 2.484924  | -1.054202 |
| 39 | 6 | 0 | 2.234416 | -0.253901 | 1.257166  |
| 40 | 1 | 0 | 3.307907 | -0.103702 | 1.112464  |
| 41 | 1 | 0 | 1.921471 | 0.275808  | 2.158751  |
| 42 | 6 | 0 | 1.910180 | -1.748814 | 1.356063  |
| 43 | 1 | 0 | 2.224901 | -2.351053 | 0.498800  |
| 44 | 1 | 0 | 2.451016 | -2.147097 | 2.218801  |
| 45 | 1 | 0 | 0.863137 | -1.968947 | 1.650767  |

## Cu<sup>+</sup>[(4-MeC<sub>6</sub>H<sub>4</sub>)<sub>2</sub>POH]

Standard orientation:

| Center<br>Number | Atomic<br>Number | Atomic<br>Type | Coordinates (Angstroms) |           |           |
|------------------|------------------|----------------|-------------------------|-----------|-----------|
|                  |                  |                | X                       | Y         | Z         |
| 1                | 15               | 0              | -0.017634               | 1.004203  | 0.487085  |
| 2                | 6                | 0              | -1.481965               | -0.005228 | 0.189548  |
| 3                | 6                | 0              | -1.482515               | -1.022799 | -0.768255 |
| 4                | 6                | 0              | -2.663093               | 0.300976  | 0.874229  |
| 5                | 6                | 0              | -2.650410               | -1.733869 | -1.021669 |
| 6                | 1                | 0              | -0.572616               | -1.267515 | -1.309369 |
| 7                | 6                | 0              | -3.821374               | -0.420515 | 0.615702  |
| 8                | 1                | 0              | -2.671225               | 1.097986  | 1.612397  |
| 9                | 6                | 0              | -3.832927               | -1.449008 | -0.332644 |
| 10               | 6                | 0              | 1.393236                | -0.092958 | 0.278237  |
| 11               | 6                | 0              | 2.486269                | 0.413231  | -0.426904 |
| 12               | 6                | 0              | 1.457925                | -1.386095 | 0.813794  |
| 13               | 6                | 0              | 3.633465                | -0.352280 | -0.597177 |
| 14               | 1                | 0              | 2.419835                | 1.415556  | -0.843021 |
| 15               | 6                | 0              | 2.608567                | -2.142092 | 0.646755  |
| 16               | 1                | 0              | 0.608596                | -1.803065 | 1.349505  |
| 17               | 6                | 0              | 3.710577                | -1.638852 | -0.059784 |
| 18               | 1                | 0              | 2.660677                | -3.142542 | 1.066847  |
| 19               | 1                | 0              | 4.476883                | 0.052000  | -1.148822 |
| 20               | 1                | 0              | -2.643347               | -2.527577 | -1.763331 |
| 21               | 1                | 0              | -4.733566               | -0.182437 | 1.155601  |
| 22               | 29               | 0              | 0.250614                | 2.769901  | -0.691142 |
| 23               | 8                | 0              | -0.132983               | 1.418539  | 2.065433  |
| 24               | 1                | 0              | -0.263698               | 0.664166  | 2.661709  |
| 25               | 6                | 0              | -5.086998               | -2.242356 | -0.585537 |

|    |   |   |           |           |           |
|----|---|---|-----------|-----------|-----------|
| 26 | 1 | 0 | -5.216406 | -3.009062 | 0.184973  |
| 27 | 1 | 0 | -5.970402 | -1.600177 | -0.560115 |
| 28 | 1 | 0 | -5.049573 | -2.745313 | -1.553779 |
| 29 | 6 | 0 | 4.939115  | -2.486645 | -0.249005 |
| 30 | 1 | 0 | 4.763669  | -3.246894 | -1.016628 |
| 31 | 1 | 0 | 5.793373  | -1.883412 | -0.560991 |
| 32 | 1 | 0 | 5.199151  | -3.009252 | 0.674655  |

## **Cu<sup>+</sup>[(4-MeC<sub>6</sub>H<sub>4</sub>)<sub>2</sub>POH]<sub>2</sub>**

Standard orientation:

| Center<br>Number | Atomic<br>Number | Atomic<br>Type | Coordinates (Angstroms) |           |           |
|------------------|------------------|----------------|-------------------------|-----------|-----------|
|                  |                  |                | X                       | Y         | Z         |
| 1                | 15               | 0              | 0.594439                | -1.981020 | -1.359960 |
| 2                | 6                | 0              | -0.665193               | -2.245908 | -0.092030 |
| 3                | 6                | 0              | -1.840865               | -2.927385 | -0.427893 |
| 4                | 6                | 0              | -0.573559               | -1.599659 | 1.142645  |
| 5                | 6                | 0              | -2.903720               | -2.956815 | 0.464438  |
| 6                | 1                | 0              | -1.916401               | -3.432674 | -1.386673 |
| 7                | 6                | 0              | -1.652754               | -1.621045 | 2.022124  |
| 8                | 1                | 0              | 0.338393                | -1.074251 | 1.414937  |
| 9                | 6                | 0              | -2.834083               | -2.287519 | 1.693120  |
| 10               | 1                | 0              | -3.813047               | -3.489945 | 0.199160  |
| 11               | 1                | 0              | -1.577016               | -1.105048 | 2.975486  |
| 12               | 15               | 0              | -0.589067               | 1.846796  | -1.456832 |
| 13               | 6                | 0              | 0.660316                | 2.278085  | -0.221555 |
| 14               | 6                | 0              | 0.592313                | 1.784375  | 1.085281  |
| 15               | 6                | 0              | 1.817128                | 2.940719  | -0.645687 |
| 16               | 6                | 0              | 1.669599                | 1.949163  | 1.948471  |
| 17               | 1                | 0              | -0.303974               | 1.274908  | 1.428776  |
| 18               | 6                | 0              | 2.884706                | 3.107878  | 0.229091  |
| 19               | 6                | 0              | 2.834510                | 2.599929  | 1.531413  |
| 20               | 1                | 0              | 1.607833                | 1.562837  | 2.962250  |
| 21               | 1                | 0              | 3.776936                | 3.629923  | -0.105985 |
| 22               | 1                | 0              | 1.880183                | 3.325260  | -1.660395 |
| 23               | 6                | 0              | 2.133570                | -1.746924 | -0.450228 |
| 24               | 6                | 0              | 2.649667                | -2.715035 | 0.422125  |
| 25               | 6                | 0              | 2.820402                | -0.546272 | -0.628531 |
| 26               | 6                | 0              | 3.837225                | -2.471020 | 1.095083  |
| 27               | 1                | 0              | 2.117994                | -3.650812 | 0.572601  |
| 28               | 6                | 0              | 4.007723                | -0.304752 | 0.057312  |
| 29               | 1                | 0              | 2.410810                | 0.210269  | -1.293906 |
| 30               | 6                | 0              | 4.532355                | -1.263696 | 0.924026  |
| 31               | 1                | 0              | 4.239080                | -3.222950 | 1.768698  |
| 32               | 1                | 0              | 4.528643                | 0.637834  | -0.087285 |
| 33               | 6                | 0              | -2.124864               | 1.649050  | -0.529908 |
| 34               | 6                | 0              | -2.584198               | 2.572244  | 0.420497  |
| 35               | 6                | 0              | -2.876559               | 0.499679  | -0.781174 |

|    |    |   |           |           |           |
|----|----|---|-----------|-----------|-----------|
| 36 | 6  | 0 | -3.775165 | 2.339190  | 1.092168  |
| 37 | 1  | 0 | -2.002771 | 3.462291  | 0.648588  |
| 38 | 6  | 0 | -4.067952 | 0.269976  | -0.100635 |
| 39 | 1  | 0 | -2.510033 | -0.234048 | -1.495161 |
| 40 | 6  | 0 | -4.533905 | 1.185862  | 0.842936  |
| 41 | 1  | 0 | -4.127857 | 3.057717  | 1.826825  |
| 42 | 1  | 0 | -4.635289 | -0.634475 | -0.302042 |
| 43 | 29 | 0 | 0.004512  | -0.089205 | -2.373953 |
| 44 | 8  | 0 | -0.688794 | 3.165309  | -2.421258 |
| 45 | 1  | 0 | -0.837417 | 3.996827  | -1.944492 |
| 46 | 8  | 0 | 0.635013  | -3.466109 | -2.053149 |
| 47 | 1  | 0 | 0.929739  | -3.420268 | -2.972730 |
| 48 | 6  | 0 | -5.812102 | 0.942931  | 1.599945  |
| 49 | 1  | 0 | -5.597460 | 0.678053  | 2.640275  |
| 50 | 1  | 0 | -6.434800 | 1.841135  | 1.613843  |
| 51 | 1  | 0 | -6.387831 | 0.128945  | 1.154978  |
| 52 | 6  | 0 | -4.015845 | -2.285296 | 2.625159  |
| 53 | 1  | 0 | -4.936685 | -2.052116 | 2.081840  |
| 54 | 1  | 0 | -4.150604 | -3.267384 | 3.088955  |
| 55 | 1  | 0 | -3.890239 | -1.548406 | 3.421248  |
| 56 | 6  | 0 | 5.814750  | -1.017870 | 1.673619  |
| 57 | 1  | 0 | 5.626848  | -0.955049 | 2.750020  |
| 58 | 1  | 0 | 6.522079  | -1.836455 | 1.515169  |
| 59 | 1  | 0 | 6.288719  | -0.087423 | 1.354537  |
| 60 | 6  | 0 | 4.020316  | 2.709345  | 2.451011  |
| 61 | 1  | 0 | 4.597878  | 1.777815  | 2.430568  |
| 62 | 1  | 0 | 4.684973  | 3.521790  | 2.150654  |
| 63 | 1  | 0 | 3.707250  | 2.877032  | 3.484112  |

## **Cu<sup>+</sup>[(4-MeC<sub>6</sub>H<sub>4</sub>)<sub>2</sub>POH]<sub>3</sub>**

Standard orientation:

| Center<br>Number | Atomic<br>Number | Atomic<br>Type | Coordinates (Angstroms) |           |           |
|------------------|------------------|----------------|-------------------------|-----------|-----------|
|                  |                  |                | X                       | Y         | Z         |
| 1                | 15               | 0              | -0.707393               | -0.026691 | -2.208986 |
| 2                | 15               | 0              | -1.579356               | -0.186026 | 1.451630  |
| 3                | 6                | 0              | -2.165923               | -0.669270 | -3.071092 |
| 4                | 6                | 0              | -3.335491               | -0.891734 | -2.333591 |
| 5                | 6                | 0              | -2.140587               | -0.986043 | -4.430411 |
| 6                | 6                | 0              | -4.468111               | -1.395253 | -2.963333 |
| 7                | 1                | 0              | -3.365522               | -0.656490 | -1.270308 |
| 8                | 6                | 0              | -3.277437               | -1.499421 | -5.046629 |
| 9                | 1                | 0              | -1.232632               | -0.843660 | -5.008419 |
| 10               | 6                | 0              | -4.456304               | -1.709492 | -4.325907 |
| 11               | 6                | 0              | -0.802627               | 1.239407  | 2.266917  |
| 12               | 6                | 0              | -0.833028               | 2.475666  | 1.615761  |



|    |    |   |           |           |           |
|----|----|---|-----------|-----------|-----------|
| 13 | 6  | 0 | -0.044886 | 1.098491  | 3.436331  |
| 14 | 6  | 0 | -0.132933 | 3.559080  | 2.140348  |
| 15 | 1  | 0 | -1.405087 | 2.593423  | 0.698837  |
| 16 | 6  | 0 | 0.643700  | 2.188567  | 3.953777  |
| 17 | 1  | 0 | 0.006040  | 0.138160  | 3.941337  |
| 18 | 6  | 0 | 0.614077  | 3.433844  | 3.313634  |
| 19 | 1  | 0 | -3.249451 | -1.742317 | -6.105329 |
| 20 | 1  | 0 | -5.375725 | -1.554592 | -2.387603 |
| 21 | 1  | 0 | -0.164339 | 4.514831  | 1.622317  |
| 22 | 1  | 0 | 1.218496  | 2.074380  | 4.869062  |
| 23 | 15 | 0 | 2.013047  | -1.076308 | 0.438931  |
| 24 | 6  | 0 | 3.129337  | -2.358276 | -0.180703 |
| 25 | 6  | 0 | 2.575486  | -3.526541 | -0.708515 |
| 26 | 6  | 0 | 4.524402  | -2.242797 | -0.095859 |
| 27 | 6  | 0 | 3.399064  | -4.558443 | -1.150966 |
| 28 | 6  | 0 | 5.338326  | -3.277135 | -0.533549 |
| 29 | 1  | 0 | 4.973809  | -1.335850 | 0.301611  |
| 30 | 6  | 0 | 4.788461  | -4.448957 | -1.070562 |
| 31 | 1  | 0 | 6.418200  | -3.178684 | -0.464190 |
| 32 | 1  | 0 | 2.956902  | -5.460342 | -1.563816 |
| 33 | 1  | 0 | 1.495434  | -3.632213 | -0.779117 |
| 34 | 6  | 0 | -2.152362 | -1.243621 | 2.801193  |
| 35 | 6  | 0 | -2.736268 | -0.728192 | 3.967522  |
| 36 | 6  | 0 | -2.050966 | -2.628047 | 2.645833  |
| 37 | 6  | 0 | -3.205363 | -1.586893 | 4.950218  |
| 38 | 1  | 0 | -2.810196 | 0.347264  | 4.111857  |
| 39 | 6  | 0 | -2.519389 | -3.483775 | 3.639205  |
| 40 | 1  | 0 | -1.602380 | -3.041405 | 1.745278  |
| 41 | 6  | 0 | -3.102675 | -2.977364 | 4.801569  |
| 42 | 1  | 0 | -3.654902 | -1.179707 | 5.851768  |
| 43 | 1  | 0 | -2.431181 | -4.558368 | 3.509198  |
| 44 | 6  | 0 | -0.996567 | 1.761383  | -2.019373 |
| 45 | 6  | 0 | -2.275582 | 2.325070  | -1.960107 |
| 46 | 6  | 0 | 0.118073  | 2.572599  | -1.797491 |
| 47 | 6  | 0 | -2.426746 | 3.679472  | -1.689730 |
| 48 | 1  | 0 | -3.154571 | 1.708490  | -2.124425 |
| 49 | 6  | 0 | -0.046017 | 3.929715  | -1.534150 |
| 50 | 1  | 0 | 1.116660  | 2.148130  | -1.829006 |
| 51 | 6  | 0 | -1.317901 | 4.502021  | -1.470042 |
| 52 | 1  | 0 | -3.424044 | 4.109334  | -1.647936 |
| 53 | 1  | 0 | 0.830168  | 4.548505  | -1.362548 |
| 54 | 6  | 0 | 2.834159  | 0.483989  | -0.002177 |
| 55 | 6  | 0 | 3.499592  | 0.639968  | -1.223467 |
| 56 | 6  | 0 | 2.646332  | 1.598122  | 0.821340  |
| 57 | 6  | 0 | 3.999817  | 1.884815  | -1.590982 |
| 58 | 1  | 0 | 3.627555  | -0.209614 | -1.888736 |
| 59 | 6  | 0 | 3.149366  | 2.837924  | 0.442597  |
| 60 | 1  | 0 | 2.103176  | 1.497209  | 1.757216  |
| 61 | 6  | 0 | 3.839008  | 3.000307  | -0.763069 |
| 62 | 1  | 0 | 4.520992  | 1.994319  | -2.538032 |

|    |    |   |           |           |           |
|----|----|---|-----------|-----------|-----------|
| 63 | 1  | 0 | 2.991545  | 3.697616  | 1.090168  |
| 64 | 29 | 0 | -0.152374 | -0.863485 | -0.183596 |
| 65 | 8  | 0 | -2.921464 | 0.479727  | 0.760745  |
| 66 | 1  | 0 | -3.462023 | 0.999470  | 1.375816  |
| 67 | 8  | 0 | 2.118694  | -1.097262 | 2.082012  |
| 68 | 1  | 0 | 3.017543  | -0.953970 | 2.415917  |
| 69 | 8  | 0 | 0.528218  | -0.095807 | -3.289194 |
| 70 | 1  | 0 | 0.447033  | 0.545363  | -4.012187 |
| 71 | 6  | 0 | 4.407554  | 4.339483  | -1.152542 |
| 72 | 1  | 0 | 5.415689  | 4.462067  | -0.743566 |
| 73 | 1  | 0 | 4.476160  | 4.440663  | -2.237896 |
| 74 | 1  | 0 | 3.795486  | 5.157871  | -0.764326 |
| 75 | 6  | 0 | 5.688113  | -5.550745 | -1.563501 |
| 76 | 1  | 0 | 6.203395  | -5.243842 | -2.478956 |
| 77 | 1  | 0 | 6.455384  | -5.788678 | -0.822133 |
| 78 | 1  | 0 | 5.122880  | -6.458534 | -1.781595 |
| 79 | 6  | 0 | -5.673634 | -2.293808 | -4.992732 |
| 80 | 1  | 0 | -5.714104 | -2.020697 | -6.049477 |
| 81 | 1  | 0 | -5.656022 | -3.386965 | -4.934090 |
| 82 | 1  | 0 | -6.591521 | -1.952107 | -4.509368 |
| 83 | 6  | 0 | -1.503165 | 5.964254  | -1.160035 |
| 84 | 1  | 0 | -2.061606 | 6.465099  | -1.955960 |
| 85 | 1  | 0 | -2.070311 | 6.096020  | -0.233232 |
| 86 | 1  | 0 | -0.541632 | 6.469206  | -1.046534 |
| 87 | 6  | 0 | 1.392259  | 4.595720  | 3.872944  |
| 88 | 1  | 0 | 1.191285  | 4.726290  | 4.939639  |
| 89 | 1  | 0 | 2.468883  | 4.427687  | 3.764361  |
| 90 | 1  | 0 | 1.141312  | 5.525452  | 3.358437  |
| 91 | 6  | 0 | -3.605866 | -3.893020 | 5.885248  |
| 92 | 1  | 0 | -3.029872 | -3.754626 | 6.805119  |
| 93 | 1  | 0 | -4.651574 | -3.677070 | 6.121059  |
| 94 | 1  | 0 | -3.528347 | -4.940362 | 5.588430  |

## Cu<sup>+</sup>[(4-MeC<sub>6</sub>H<sub>4</sub>)<sub>2</sub>POH]<sub>4</sub>

Standard orientation:

| Center<br>Number | Atomic<br>Number | Atomic<br>Type | Coordinates (Angstroms) |          |           |
|------------------|------------------|----------------|-------------------------|----------|-----------|
|                  |                  |                | X                       | Y        | Z         |
| 1                | 15               | 0              | 1.076139                | 1.842257 | -1.208265 |
| 2                | 15               | 0              | 0.085088                | 0.100919 | 2.021669  |
| 3                | 6                | 0              | 0.017292                | 3.308578 | -1.355927 |
| 4                | 6                | 0              | -0.648281               | 3.761224 | -0.208817 |
| 5                | 6                | 0              | -0.205447               | 3.949456 | -2.574420 |
| 6                | 6                | 0              | -1.479113               | 4.871226 | -0.280314 |
| 7                | 1                | 0              | -0.516840               | 3.244093 | 0.741843  |
| 8                | 6                | 0              | -1.063913               | 5.044397 | -2.638997 |

|    |    |   |           |           |           |
|----|----|---|-----------|-----------|-----------|
| 9  | 1  | 0 | 0.279052  | 3.590126  | -3.477503 |
| 10 | 6  | 0 | -1.707158 | 5.523742  | -1.496508 |
| 11 | 6  | 0 | 1.655505  | -0.489293 | 2.735944  |
| 12 | 6  | 0 | 2.770885  | 0.345409  | 2.606121  |
| 13 | 6  | 0 | 1.819589  | -1.767567 | 3.281369  |
| 14 | 6  | 0 | 4.025510  | -0.091001 | 3.021544  |
| 15 | 1  | 0 | 2.664615  | 1.338802  | 2.175399  |
| 16 | 6  | 0 | 3.079616  | -2.195681 | 3.684473  |
| 17 | 1  | 0 | 0.967871  | -2.431269 | 3.392789  |
| 18 | 6  | 0 | 4.201972  | -1.368280 | 3.558434  |
| 19 | 1  | 0 | -1.235577 | 5.534321  | -3.593696 |
| 20 | 1  | 0 | -1.979673 | 5.223706  | 0.617970  |
| 21 | 1  | 0 | 4.882324  | 0.568711  | 2.906148  |
| 22 | 1  | 0 | 3.197078  | -3.190156 | 4.107106  |
| 23 | 15 | 0 | 1.061896  | -1.950347 | -0.967945 |
| 24 | 6  | 0 | 0.484692  | -2.683123 | -2.526765 |
| 25 | 6  | 0 | 0.195512  | -1.822807 | -3.592929 |
| 26 | 6  | 0 | 0.252786  | -4.052526 | -2.669777 |
| 27 | 6  | 0 | -0.283801 | -2.337020 | -4.791980 |
| 28 | 6  | 0 | -0.244363 | -4.554621 | -3.868782 |
| 29 | 1  | 0 | 0.436187  | -4.729636 | -1.840243 |
| 30 | 6  | 0 | -0.511732 | -3.708303 | -4.948269 |
| 31 | 1  | 0 | -0.431365 | -5.620335 | -3.967469 |
| 32 | 1  | 0 | -0.503021 | -1.662454 | -5.615200 |
| 33 | 1  | 0 | 0.341878  | -0.748887 | -3.484348 |
| 34 | 15 | 0 | -2.240062 | 0.026758  | -0.957550 |
| 35 | 6  | 0 | -3.258448 | -1.361013 | -0.353890 |
| 36 | 6  | 0 | -2.827466 | -2.648245 | -0.707857 |
| 37 | 6  | 0 | -4.388197 | -1.224528 | 0.453137  |
| 38 | 6  | 0 | -3.514758 | -3.768274 | -0.262415 |
| 39 | 1  | 0 | -1.955195 | -2.768857 | -1.348404 |
| 40 | 6  | 0 | -5.065492 | -2.355087 | 0.904802  |
| 41 | 6  | 0 | -4.639193 | -3.638900 | 0.562570  |
| 42 | 1  | 0 | -3.172096 | -4.758981 | -0.550208 |
| 43 | 1  | 0 | -5.945497 | -2.234301 | 1.531916  |
| 44 | 6  | 0 | -3.182010 | 1.510218  | -0.495478 |
| 45 | 6  | 0 | -3.782158 | 2.327287  | -1.451438 |
| 46 | 6  | 0 | -3.253911 | 1.871912  | 0.856094  |
| 47 | 6  | 0 | -4.470051 | 3.473459  | -1.058441 |
| 48 | 6  | 0 | -3.948420 | 3.011234  | 1.238996  |
| 49 | 1  | 0 | -2.775061 | 1.250587  | 1.611892  |
| 50 | 6  | 0 | -4.566267 | 3.831365  | 0.286499  |
| 51 | 1  | 0 | -4.006406 | 3.277254  | 2.291481  |
| 52 | 1  | 0 | -4.939472 | 4.099718  | -1.812947 |
| 53 | 1  | 0 | -4.747877 | -0.239825 | 0.734479  |
| 54 | 1  | 0 | -3.704906 | 2.079201  | -2.505725 |
| 55 | 6  | 0 | -1.221027 | -0.845922 | 2.854903  |
| 56 | 6  | 0 | -2.078306 | -0.276963 | 3.796604  |
| 57 | 6  | 0 | -1.427586 | -2.173158 | 2.450577  |
| 58 | 6  | 0 | -3.125152 | -1.027477 | 4.330410  |

|     |    |   |           |           |           |
|-----|----|---|-----------|-----------|-----------|
| 59  | 1  | 0 | -1.945353 | 0.757099  | 4.103374  |
| 60  | 6  | 0 | -2.454686 | -2.918250 | 3.010560  |
| 61  | 1  | 0 | -0.783200 | -2.622129 | 1.695530  |
| 62  | 6  | 0 | -3.327109 | -2.354055 | 3.948834  |
| 63  | 1  | 0 | -3.795387 | -0.573155 | 5.054967  |
| 64  | 1  | 0 | -2.602024 | -3.948306 | 2.695504  |
| 65  | 6  | 0 | 2.576863  | 2.419921  | -0.349316 |
| 66  | 6  | 0 | 2.589108  | 3.491662  | 0.550037  |
| 67  | 6  | 0 | 3.735138  | 1.652192  | -0.508586 |
| 68  | 6  | 0 | 3.737882  | 3.775029  | 1.280928  |
| 69  | 1  | 0 | 1.706156  | 4.107917  | 0.685763  |
| 70  | 6  | 0 | 4.882420  | 1.952253  | 0.219095  |
| 71  | 1  | 0 | 3.741905  | 0.813667  | -1.200629 |
| 72  | 6  | 0 | 4.900346  | 3.010275  | 1.130829  |
| 73  | 1  | 0 | 3.734939  | 4.607642  | 1.979622  |
| 74  | 1  | 0 | 5.772592  | 1.341507  | 0.086086  |
| 75  | 6  | 0 | 2.866179  | -1.800001 | -1.167681 |
| 76  | 6  | 0 | 3.465744  | -1.561091 | -2.409091 |
| 77  | 6  | 0 | 3.655953  | -1.792279 | -0.013364 |
| 78  | 6  | 0 | 4.833016  | -1.322662 | -2.486500 |
| 79  | 1  | 0 | 2.867187  | -1.558906 | -3.315255 |
| 80  | 6  | 0 | 5.024715  | -1.557161 | -0.104073 |
| 81  | 1  | 0 | 3.204638  | -1.962580 | 0.961426  |
| 82  | 6  | 0 | 5.633830  | -1.313862 | -1.336956 |
| 83  | 1  | 0 | 5.290768  | -1.139547 | -3.455173 |
| 84  | 1  | 0 | 5.623221  | -1.544784 | 0.804039  |
| 85  | 29 | 0 | 0.011918  | 0.005646  | -0.290482 |
| 86  | 8  | 0 | 1.613681  | 1.522846  | -2.731566 |
| 87  | 1  | 0 | 2.217555  | 2.197582  | -3.079139 |
| 88  | 8  | 0 | 0.919787  | -3.146495 | 0.157326  |
| 89  | 1  | 0 | 1.568493  | -3.860063 | 0.054300  |
| 90  | 8  | 0 | -0.044474 | 1.638496  | 2.599051  |
| 91  | 1  | 0 | 0.207844  | 1.726792  | 3.531521  |
| 92  | 8  | 0 | -2.388815 | -0.065913 | -2.595491 |
| 93  | 1  | 0 | -3.296110 | -0.243058 | -2.887923 |
| 94  | 6  | 0 | -4.472171 | -3.163179 | 4.495469  |
| 95  | 1  | 0 | -4.130549 | -4.140440 | 4.848015  |
| 96  | 1  | 0 | -4.966675 | -2.650433 | 5.322795  |
| 97  | 1  | 0 | -5.218076 | -3.342352 | 3.713076  |
| 98  | 6  | 0 | 5.561216  | -1.856154 | 3.986917  |
| 99  | 1  | 0 | 5.566912  | -2.113340 | 5.050161  |
| 100 | 1  | 0 | 5.842883  | -2.757306 | 3.433816  |
| 101 | 1  | 0 | 6.326295  | -1.096161 | 3.815431  |
| 102 | 6  | 0 | -5.270273 | 5.094253  | 0.707391  |
| 103 | 1  | 0 | -5.936829 | 5.458488  | -0.077628 |
| 104 | 1  | 0 | -5.856652 | 4.937140  | 1.616298  |
| 105 | 1  | 0 | -4.543197 | 5.886477  | 0.920479  |
| 106 | 6  | 0 | -5.344382 | -4.859568 | 1.091619  |
| 107 | 1  | 0 | -6.334994 | -4.609708 | 1.478411  |
| 108 | 1  | 0 | -5.456943 | -5.620671 | 0.315311  |

|     |   |   |           |           |           |
|-----|---|---|-----------|-----------|-----------|
| 109 | 1 | 0 | -4.771572 | -5.311473 | 1.909757  |
| 110 | 6 | 0 | -2.666429 | 6.681256  | -1.573776 |
| 111 | 1 | 0 | -2.440405 | 7.330999  | -2.422127 |
| 112 | 1 | 0 | -3.692654 | 6.316396  | -1.697897 |
| 113 | 1 | 0 | -2.640248 | 7.280039  | -0.659803 |
| 114 | 6 | 0 | 6.136515  | 3.333785  | 1.928592  |
| 115 | 1 | 0 | 6.584577  | 4.271732  | 1.586164  |
| 116 | 1 | 0 | 5.898146  | 3.455053  | 2.988959  |
| 117 | 1 | 0 | 6.887450  | 2.546767  | 1.831207  |
| 118 | 6 | 0 | 7.112486  | -1.045640 | -1.439372 |
| 119 | 1 | 0 | 7.621061  | -1.861048 | -1.962569 |
| 120 | 1 | 0 | 7.304713  | -0.127822 | -2.002488 |
| 121 | 1 | 0 | 7.565551  | -0.943759 | -0.450827 |
| 122 | 6 | 0 | -1.024107 | -4.255351 | -6.254649 |
| 123 | 1 | 0 | -0.205787 | -4.362894 | -6.973849 |
| 124 | 1 | 0 | -1.481458 | -5.237751 | -6.120856 |
| 125 | 1 | 0 | -1.763957 | -3.584997 | -6.698638 |

---

## $\text{Cu}^+(\text{NEt}_3)$

Standard orientation:

| Center<br>Number | Atomic<br>Number | Atomic<br>Type | Coordinates (Angstroms) |           |           |
|------------------|------------------|----------------|-------------------------|-----------|-----------|
|                  |                  |                | X                       | Y         | Z         |
| 1                | 6                | 0              | -1.753180               | -0.496468 | 0.509583  |
| 2                | 6                | 0              | -2.434596               | -0.103862 | -0.790127 |
| 3                | 29               | 0              | 0.687206                | -0.034995 | -1.066108 |
| 4                | 1                | 0              | -1.709700               | -1.586174 | 0.582481  |
| 5                | 1                | 0              | -2.309026               | -0.134181 | 1.383887  |
| 6                | 1                | 0              | -1.920303               | -0.569404 | -1.637390 |
| 7                | 1                | 0              | -3.472628               | -0.442370 | -0.795556 |
| 8                | 1                | 0              | -2.434113               | 0.979283  | -0.940840 |
| 9                | 6                | 0              | -0.330574               | 1.436367  | 1.015977  |
| 10               | 1                | 0              | -1.222289               | 1.929876  | 0.622945  |
| 11               | 1                | 0              | -0.376650               | 1.490047  | 2.110295  |
| 12               | 6                | 0              | 0.912707                | 2.121695  | 0.469162  |
| 13               | 1                | 0              | 1.833459                | 1.682220  | 0.863895  |
| 14               | 1                | 0              | 0.918976                | 2.036087  | -0.628731 |
| 15               | 1                | 0              | 0.923599                | 3.184660  | 0.714298  |
| 16               | 6                | 0              | 0.493818                | -0.846293 | 1.425139  |
| 17               | 1                | 0              | 1.325663                | -0.244771 | 1.800083  |
| 18               | 1                | 0              | -0.071475               | -1.199018 | 2.295358  |
| 19               | 6                | 0              | 1.038705                | -2.005596 | 0.599551  |
| 20               | 1                | 0              | 1.690056                | -1.617399 | -0.201083 |
| 21               | 1                | 0              | 1.644989                | -2.678188 | 1.207890  |
| 22               | 1                | 0              | 0.239203                | -2.592464 | 0.138976  |
| 23               | 7                | 0              | -0.364288               | 0.020227  | 0.574987  |

## $\text{Cu}^+(\text{NEt}_3)_2$ (9)

Standard orientation:

| Center<br>Number | Atomic<br>Number | Atomic<br>Type | Coordinates (Angstroms) |           |           |
|------------------|------------------|----------------|-------------------------|-----------|-----------|
|                  |                  |                | X                       | Y         | Z         |
| 1                | 6                | 0              | 2.479969                | 0.431927  | 1.125342  |
| 2                | 6                | 0              | -2.491723               | -0.576377 | -1.042801 |
| 3                | 6                | 0              | -4.013392               | -0.642168 | -1.086232 |
| 4                | 29               | 0              | 0.003982                | 0.034339  | -0.041661 |
| 5                | 1                | 0              | -2.103968               | -0.184176 | -1.987356 |
| 6                | 1                | 0              | -2.084075               | -1.584441 | -0.931494 |
| 7                | 1                | 0              | -4.465976               | 0.345554  | -1.200216 |
| 8                | 1                | 0              | -4.310217               | -1.243963 | -1.947844 |
| 9                | 1                | 0              | -4.430209               | -1.115764 | -0.193993 |
| 10               | 6                | 0              | -2.229110               | 1.706543  | -0.196348 |

|    |   |   |           |           |           |
|----|---|---|-----------|-----------|-----------|
| 11 | 1 | 0 | -2.005447 | 1.910096  | -1.247915 |
| 12 | 1 | 0 | -3.301802 | 1.876873  | -0.046390 |
| 13 | 6 | 0 | -1.422124 | 2.647481  | 0.687139  |
| 14 | 1 | 0 | -1.726303 | 2.605963  | 1.734479  |
| 15 | 1 | 0 | -0.355763 | 2.401559  | 0.627796  |
| 16 | 1 | 0 | -1.552895 | 3.675219  | 0.343406  |
| 17 | 6 | 0 | -2.363058 | -0.153947 | 1.387302  |
| 18 | 1 | 0 | -1.867972 | 0.494109  | 2.113439  |
| 19 | 1 | 0 | -3.442593 | 0.015927  | 1.483088  |
| 20 | 6 | 0 | -2.010635 | -1.601996 | 1.692171  |
| 21 | 1 | 0 | -0.944916 | -1.778000 | 1.504738  |
| 22 | 1 | 0 | -2.207662 | -1.815379 | 2.744030  |
| 23 | 1 | 0 | -2.588016 | -2.309780 | 1.092987  |
| 24 | 7 | 0 | -1.908463 | 0.272836  | 0.037183  |
| 25 | 7 | 0 | 1.908641  | -0.269966 | -0.062373 |
| 26 | 1 | 0 | 2.007223  | -0.014083 | 2.005682  |
| 27 | 1 | 0 | 2.150487  | 1.473600  | 1.086807  |
| 28 | 6 | 0 | 3.996381  | 0.368960  | 1.259180  |
| 29 | 1 | 0 | 4.504098  | 0.886522  | 0.441575  |
| 30 | 1 | 0 | 4.285158  | 0.860841  | 2.190450  |
| 31 | 1 | 0 | 4.360604  | -0.660413 | 1.299877  |
| 32 | 6 | 0 | 2.122151  | -1.739643 | 0.043408  |
| 33 | 1 | 0 | 1.938503  | -2.016566 | 1.086162  |
| 34 | 1 | 0 | 3.167805  | -1.979742 | -0.181977 |
| 35 | 6 | 0 | 1.191545  | -2.535452 | -0.860469 |
| 36 | 1 | 0 | 1.357712  | -3.604108 | -0.712249 |
| 37 | 1 | 0 | 0.146418  | -2.318727 | -0.616796 |
| 38 | 1 | 0 | 1.348538  | -2.318045 | -1.919009 |
| 39 | 6 | 0 | 2.477050  | 0.245233  | -1.337328 |
| 40 | 1 | 0 | 3.546722  | 0.006332  | -1.380744 |
| 41 | 1 | 0 | 1.992326  | -0.297187 | -2.151929 |
| 42 | 6 | 0 | 2.248269  | 1.736975  | -1.522847 |
| 43 | 1 | 0 | 2.840231  | 2.339274  | -0.829995 |
| 44 | 1 | 0 | 2.523523  | 2.027166  | -2.538307 |
| 45 | 1 | 0 | 1.189811  | 1.980200  | -1.374897 |

## **Cu<sup>+</sup>(NEt<sub>3</sub>)<sub>3</sub>**

Standard orientation:

| Center<br>Number | Atomic<br>Number | Atomic<br>Type | Coordinates (Angstroms) |           |           |
|------------------|------------------|----------------|-------------------------|-----------|-----------|
|                  |                  |                | X                       | Y         | Z         |
| 1                | 6                | 0              | -1.533298               | 1.861282  | -1.117077 |
| 2                | 6                | 0              | -1.583929               | -2.052109 | 1.197666  |
| 3                | 6                | 0              | -2.255274               | -3.402476 | 1.441185  |
| 4                | 29               | 0              | 0.117745                | -0.039725 | -0.072367 |
| 5                | 1                | 0              | -0.666560               | -1.994622 | 1.796254  |

|    |   |   |           |           |           |
|----|---|---|-----------|-----------|-----------|
| 6  | 1 | 0 | -2.236189 | -1.250906 | 1.553313  |
| 7  | 1 | 0 | -1.581177 | -4.238784 | 1.244649  |
| 8  | 1 | 0 | -2.557687 | -3.460347 | 2.489349  |
| 9  | 1 | 0 | -3.151940 | -3.533061 | 0.829316  |
| 10 | 6 | 0 | -0.270048 | -2.787839 | -0.692482 |
| 11 | 1 | 0 | 0.500555  | -2.914879 | 0.071300  |
| 12 | 1 | 0 | -0.790427 | -3.750632 | -0.782796 |
| 13 | 6 | 0 | 0.353765  | -2.415464 | -2.026572 |
| 14 | 1 | 0 | -0.349187 | -2.507512 | -2.856388 |
| 15 | 1 | 0 | 0.693350  | -1.377692 | -1.971222 |
| 16 | 1 | 0 | 1.213431  | -3.054536 | -2.243888 |
| 17 | 6 | 0 | -2.383078 | -1.771479 | -1.127123 |
| 18 | 1 | 0 | -2.066765 | -1.313647 | -2.069111 |
| 19 | 1 | 0 | -2.610491 | -2.822747 | -1.356830 |
| 20 | 6 | 0 | -3.673649 | -1.108947 | -0.662908 |
| 21 | 1 | 0 | -3.605501 | -0.022966 | -0.591119 |
| 22 | 1 | 0 | -4.440651 | -1.328504 | -1.409691 |
| 23 | 1 | 0 | -4.031418 | -1.497055 | 0.293367  |
| 24 | 7 | 0 | -1.205121 | -1.742329 | -0.206213 |
| 25 | 7 | 0 | -0.919176 | 1.783780  | 0.236926  |
| 26 | 1 | 0 | -1.924310 | 0.866329  | -1.348122 |
| 27 | 1 | 0 | -0.730878 | 2.050445  | -1.834399 |
| 28 | 6 | 0 | -2.642343 | 2.893511  | -1.306678 |
| 29 | 1 | 0 | -2.333758 | 3.892218  | -0.984758 |
| 30 | 1 | 0 | -2.897665 | 2.948480  | -2.367350 |
| 31 | 1 | 0 | -3.550758 | 2.627498  | -0.760918 |
| 32 | 6 | 0 | -1.983868 | 1.558855  | 1.247759  |
| 33 | 1 | 0 | -2.585785 | 0.715091  | 0.906406  |
| 34 | 1 | 0 | -2.643386 | 2.436812  | 1.278752  |
| 35 | 6 | 0 | -1.484422 | 1.274829  | 2.656629  |
| 36 | 1 | 0 | -0.871272 | 2.086574  | 3.055113  |
| 37 | 1 | 0 | -2.349006 | 1.160808  | 3.315365  |
| 38 | 1 | 0 | -0.907852 | 0.347255  | 2.708723  |
| 39 | 6 | 0 | -0.218090 | 3.049806  | 0.595048  |
| 40 | 1 | 0 | -0.953913 | 3.767539  | 0.987096  |
| 41 | 1 | 0 | 0.462178  | 2.822158  | 1.418613  |
| 42 | 6 | 0 | 0.556695  | 3.716778  | -0.531773 |
| 43 | 1 | 0 | -0.101154 | 4.176333  | -1.272861 |
| 44 | 1 | 0 | 1.182770  | 4.505020  | -0.107770 |
| 45 | 1 | 0 | 1.207721  | 3.015643  | -1.055060 |
| 46 | 7 | 0 | 2.236542  | -0.240186 | -0.086986 |
| 47 | 6 | 0 | 2.669559  | -1.509993 | 0.566102  |
| 48 | 1 | 0 | 2.413313  | -2.314599 | -0.127425 |
| 49 | 1 | 0 | 2.061499  | -1.656317 | 1.464902  |
| 50 | 6 | 0 | 2.878921  | -0.155830 | -1.424787 |
| 51 | 1 | 0 | 3.951586  | 0.046028  | -1.311761 |
| 52 | 1 | 0 | 2.788193  | -1.139099 | -1.891606 |
| 53 | 6 | 0 | 2.668692  | 0.926525  | 0.724846  |
| 54 | 1 | 0 | 2.318231  | 1.826757  | 0.215093  |
| 55 | 1 | 0 | 3.764877  | 0.983870  | 0.751388  |



|    |   |   |          |           |           |
|----|---|---|----------|-----------|-----------|
| 56 | 6 | 0 | 4.148485 | -1.624013 | 0.928828  |
| 57 | 1 | 0 | 4.450795 | -0.896291 | 1.685608  |
| 58 | 1 | 0 | 4.326164 | -2.619891 | 1.341109  |
| 59 | 1 | 0 | 4.796786 | -1.507289 | 0.057332  |
| 60 | 6 | 0 | 2.093737 | 0.881849  | 2.128593  |
| 61 | 1 | 0 | 1.023487 | 0.672023  | 2.049979  |
| 62 | 1 | 0 | 2.554046 | 0.110841  | 2.750540  |
| 63 | 1 | 0 | 2.224571 | 1.842680  | 2.630971  |
| 64 | 6 | 0 | 2.249527 | 0.894538  | -2.325794 |
| 65 | 1 | 0 | 1.157077 | 0.853955  | -2.242017 |
| 66 | 1 | 0 | 2.580790 | 1.904552  | -2.078102 |
| 67 | 1 | 0 | 2.517693 | 0.706711  | -3.367552 |

## Cu<sup>+</sup>(NEt<sub>3</sub>)<sub>4</sub>

Standard orientation:

| Center<br>Number | Atomic<br>Number | Atomic<br>Type | Coordinates (Angstroms) |           |           |
|------------------|------------------|----------------|-------------------------|-----------|-----------|
|                  |                  |                | X                       | Y         | Z         |
| 1                | 6                | 0              | -3.748575               | 0.211359  | 0.619100  |
| 2                | 1                | 0              | -3.743899               | 1.018134  | -0.123243 |
| 3                | 1                | 0              | -4.481267               | 0.486181  | 1.388595  |
| 4                | 6                | 0              | -2.140376               | 1.525522  | 1.812168  |
| 5                | 1                | 0              | -2.224430               | 2.226671  | 0.984353  |
| 6                | 1                | 0              | -1.100588               | 1.554315  | 2.147336  |
| 7                | 6                | 0              | 3.247704                | -1.120170 | 1.778052  |
| 8                | 1                | 0              | 2.208635                | -1.185362 | 2.122301  |
| 9                | 1                | 0              | 3.454513                | -2.061846 | 1.254595  |
| 10               | 6                | 0              | 4.605744                | -0.083947 | 0.062695  |
| 11               | 1                | 0              | 4.764934                | -1.122001 | -0.251477 |
| 12               | 1                | 0              | 5.451190                | 0.183255  | 0.720811  |
| 13               | 6                | 0              | 0.353529                | -1.943678 | -2.462312 |
| 14               | 1                | 0              | -0.378275               | -1.448495 | -3.107387 |
| 15               | 1                | 0              | 0.444940                | -2.973655 | -2.827565 |
| 16               | 6                | 0              | 0.995450                | 2.119095  | -1.145084 |
| 17               | 1                | 0              | 1.100629                | 2.654200  | -0.201963 |
| 18               | 1                | 0              | 1.528905                | 1.175317  | -0.995168 |
| 19               | 6                | 0              | -1.270275               | 3.051442  | -1.161550 |
| 20               | 1                | 0              | -1.273118               | 3.595828  | -2.117474 |
| 21               | 1                | 0              | -2.306074               | 2.743102  | -0.991652 |
| 22               | 6                | 0              | -1.424978               | -2.825540 | -1.111575 |
| 23               | 1                | 0              | -1.900782               | -2.758750 | -0.130246 |
| 24               | 1                | 0              | -2.114134               | -2.373788 | -1.831641 |
| 25               | 6                | 0              | -0.715557               | 1.265816  | -2.658984 |
| 26               | 1                | 0              | -0.678333               | 2.064996  | -3.411355 |
| 27               | 1                | 0              | 0.085797                | 0.568715  | -2.907014 |
| 28               | 6                | 0              | 3.063586                | 1.270328  | 1.353271  |

|    |   |   |           |           |           |
|----|---|---|-----------|-----------|-----------|
| 29 | 1 | 0 | 3.842214  | 1.566437  | 2.078750  |
| 30 | 1 | 0 | 3.111254  | 2.001726  | 0.541626  |
| 31 | 6 | 0 | 0.838320  | -2.548960 | -0.193690 |
| 32 | 1 | 0 | 1.598086  | -1.773826 | -0.057753 |
| 33 | 1 | 0 | 1.318179  | -3.393505 | -0.711030 |
| 34 | 6 | 0 | -2.368880 | -0.854442 | 2.307370  |
| 35 | 1 | 0 | -3.310776 | -0.816887 | 2.874703  |
| 36 | 1 | 0 | -2.332769 | -1.834466 | 1.824220  |
| 37 | 6 | 0 | -2.056756 | 0.555860  | -2.736379 |
| 38 | 1 | 0 | -2.896119 | 1.206917  | -2.481230 |
| 39 | 1 | 0 | -2.230332 | 0.169949  | -3.743412 |
| 40 | 1 | 0 | -2.057577 | -0.302619 | -2.053671 |
| 41 | 6 | 0 | -0.830196 | 4.020188  | -0.068825 |
| 42 | 1 | 0 | 0.055678  | 4.587020  | -0.364179 |
| 43 | 1 | 0 | -1.636275 | 4.736252  | 0.109214  |
| 44 | 1 | 0 | -0.609050 | 3.518972  | 0.876314  |
| 45 | 6 | 0 | 1.642158  | 2.925245  | -2.266962 |
| 46 | 1 | 0 | 1.100505  | 3.854730  | -2.469032 |
| 47 | 1 | 0 | 2.661148  | 3.191966  | -1.973830 |
| 48 | 1 | 0 | 1.705040  | 2.356547  | -3.198794 |
| 49 | 6 | 0 | -4.215165 | -1.075842 | -0.036355 |
| 50 | 1 | 0 | -3.600046 | -1.346860 | -0.893589 |
| 51 | 1 | 0 | -4.233021 | -1.916346 | 0.661658  |
| 52 | 1 | 0 | -5.235363 | -0.928318 | -0.397991 |
| 53 | 6 | 0 | -1.193126 | -0.715249 | 3.267265  |
| 54 | 1 | 0 | -1.086472 | -1.637286 | 3.843606  |
| 55 | 1 | 0 | -0.256073 | -0.540305 | 2.731210  |
| 56 | 1 | 0 | -1.326170 | 0.107113  | 3.973112  |
| 57 | 6 | 0 | -3.064181 | 1.997104  | 2.936462  |
| 58 | 1 | 0 | -2.668064 | 2.938098  | 3.326782  |
| 59 | 1 | 0 | -4.079729 | 2.192876  | 2.587345  |
| 60 | 1 | 0 | -3.119745 | 1.292508  | 3.769400  |
| 61 | 6 | 0 | 4.638000  | 0.812447  | -1.170215 |
| 62 | 1 | 0 | 3.773659  | 0.616377  | -1.811701 |
| 63 | 1 | 0 | 4.647325  | 1.874894  | -0.913963 |
| 64 | 1 | 0 | 5.543993  | 0.610210  | -1.747015 |
| 65 | 6 | 0 | 1.691126  | 1.352371  | 2.009856  |
| 66 | 1 | 0 | 1.648885  | 0.795172  | 2.950202  |
| 67 | 1 | 0 | 1.437901  | 2.393543  | 2.232738  |
| 68 | 1 | 0 | 0.925778  | 0.947610  | 1.332310  |
| 69 | 6 | 0 | 4.172562  | -1.001731 | 2.992518  |
| 70 | 1 | 0 | 4.051139  | -1.879456 | 3.632638  |
| 71 | 1 | 0 | 5.224345  | -0.945614 | 2.699259  |
| 72 | 1 | 0 | 3.938750  | -0.118397 | 3.593868  |
| 73 | 6 | 0 | 0.335993  | -3.018613 | 1.159010  |
| 74 | 1 | 0 | 1.190435  | -3.319569 | 1.769896  |
| 75 | 1 | 0 | -0.181187 | -2.215710 | 1.681397  |
| 76 | 1 | 0 | -0.340053 | -3.874045 | 1.089893  |
| 77 | 6 | 0 | -1.248556 | -4.297728 | -1.488167 |
| 78 | 1 | 0 | -2.198456 | -4.807036 | -1.308007 |

|    |    |   |           |           |           |
|----|----|---|-----------|-----------|-----------|
| 79 | 1  | 0 | -1.002367 | -4.436650 | -2.541967 |
| 80 | 1  | 0 | -0.485995 | -4.800702 | -0.889115 |
| 81 | 6  | 0 | 1.722792  | -1.287477 | -2.578010 |
| 82 | 1  | 0 | 1.775856  | -0.359706 | -2.007698 |
| 83 | 1  | 0 | 2.518854  | -1.939634 | -2.211842 |
| 84 | 1  | 0 | 1.929873  | -1.061148 | -3.627156 |
| 85 | 7  | 0 | 3.328321  | -0.048081 | 0.779207  |
| 86 | 7  | 0 | -0.448782 | 1.812908  | -1.308305 |
| 87 | 7  | 0 | -2.394529 | 0.176555  | 1.235321  |
| 88 | 7  | 0 | -0.207319 | -1.967148 | -1.082654 |
| 89 | 29 | 0 | -0.968200 | -0.099231 | -0.316618 |

---

## $\text{Cu}^+(\text{N}^i\text{Pr}_2\text{Et})$

Standard orientation:

| Center<br>Number | Atomic<br>Number | Atomic<br>Type | Coordinates (Angstroms) |           |           |
|------------------|------------------|----------------|-------------------------|-----------|-----------|
|                  |                  |                | X                       | Y         | Z         |
| 1                | 6                | 0              | 0.729755                | -1.310060 | -0.914642 |
| 2                | 6                | 0              | 1.578963                | -2.404683 | -0.277774 |
| 3                | 29               | 0              | -0.612873               | 1.113975  | -1.034552 |
| 4                | 1                | 0              | -0.109033               | -1.744464 | -1.457262 |
| 5                | 1                | 0              | 1.314191                | -0.772235 | -1.663866 |
| 6                | 1                | 0              | 1.087714                | -2.854657 | 0.589343  |
| 7                | 1                | 0              | 1.750779                | -3.193070 | -1.013928 |
| 8                | 1                | 0              | 2.554875                | -2.034186 | 0.043872  |
| 9                | 6                | 0              | -0.995811               | -0.776779 | 0.858051  |
| 10               | 1                | 0              | -0.625675               | -1.011347 | 1.863229  |
| 11               | 6                | 0              | -2.036106               | 0.348572  | 0.934382  |
| 12               | 1                | 0              | -1.666201               | 1.262739  | 1.396245  |
| 13               | 1                | 0              | -2.382435               | 0.577158  | -0.087781 |
| 14               | 1                | 0              | -2.913213               | 0.026766  | 1.499327  |
| 15               | 6                | 0              | 1.275174                | 0.304177  | 0.857413  |
| 16               | 1                | 0              | 1.735167                | -0.507321 | 1.434896  |
| 17               | 6                | 0              | 2.313246                | 0.939669  | -0.065053 |
| 18               | 1                | 0              | 1.792961                | 1.615056  | -0.756824 |
| 19               | 1                | 0              | 3.021270                | 1.530932  | 0.517795  |
| 20               | 1                | 0              | 2.883188                | 0.216390  | -0.649499 |
| 21               | 7                | 0              | 0.171802                | -0.290685 | 0.027505  |
| 22               | 6                | 0              | 0.790379                | 1.360203  | 1.844976  |
| 23               | 1                | 0              | 0.346636                | 2.213047  | 1.318124  |
| 24               | 1                | 0              | 0.073769                | 0.977929  | 2.573169  |
| 25               | 1                | 0              | 1.654697                | 1.729529  | 2.400582  |
| 26               | 6                | 0              | -1.697203               | -2.015944 | 0.305920  |
| 27               | 1                | 0              | -1.046350               | -2.886838 | 0.228125  |
| 28               | 1                | 0              | -2.510402               | -2.270231 | 0.989167  |
| 29               | 1                | 0              | -2.141625               | -1.816603 | -0.674878 |

## $\text{Cu}^+(\text{N}^i\text{Pr}_2\text{Et})_2$

Standard orientation:

| Center<br>Number | Atomic<br>Number | Atomic<br>Type | Coordinates (Angstroms) |          |           |
|------------------|------------------|----------------|-------------------------|----------|-----------|
|                  |                  |                | X                       | Y        | Z         |
| 1                | 6                | 0              | -2.483952               | 0.325027 | 1.130948  |
| 2                | 6                | 0              | 2.572936                | 1.284286 | 0.283516  |
| 3                | 6                | 0              | 4.087282                | 1.253731 | 0.469856  |
| 4                | 29               | 0              | -0.004761               | 0.118730 | -0.028606 |

|    |   |   |           |           |           |
|----|---|---|-----------|-----------|-----------|
| 5  | 1 | 0 | 2.139385  | 1.858990  | 1.108705  |
| 6  | 1 | 0 | 4.586850  | 0.765727  | -0.371802 |
| 7  | 1 | 0 | 4.456568  | 2.281018  | 0.518823  |
| 8  | 1 | 0 | 4.383479  | 0.746647  | 1.392119  |
| 9  | 6 | 0 | 2.556159  | -1.158542 | -0.390999 |
| 10 | 1 | 0 | 3.597495  | -1.251543 | -0.055831 |
| 11 | 6 | 0 | 1.870455  | -2.503017 | -0.156241 |
| 12 | 1 | 0 | 1.913367  | -2.835729 | 0.881947  |
| 13 | 1 | 0 | 0.820954  | -2.463396 | -0.465760 |
| 14 | 1 | 0 | 2.365095  | -3.263312 | -0.764016 |
| 15 | 6 | 0 | 2.030812  | -0.459682 | 1.894411  |
| 16 | 1 | 0 | 2.817379  | -1.211212 | 2.011131  |
| 17 | 1 | 0 | 2.357130  | 0.417815  | 2.455434  |
| 18 | 6 | 0 | 0.723248  | -0.943695 | 2.498737  |
| 19 | 1 | 0 | 0.326012  | -1.831551 | 2.000296  |
| 20 | 1 | 0 | 0.873250  | -1.193982 | 3.551523  |
| 21 | 1 | 0 | -0.025103 | -0.148954 | 2.452826  |
| 22 | 7 | 0 | 1.915507  | -0.075352 | 0.440996  |
| 23 | 7 | 0 | -1.973146 | 0.171939  | -0.278147 |
| 24 | 1 | 0 | -2.045018 | -0.503487 | 1.694582  |
| 25 | 6 | 0 | -4.002253 | 0.225057  | 1.269149  |
| 26 | 1 | 0 | -4.397375 | -0.704677 | 0.854057  |
| 27 | 1 | 0 | -4.258034 | 0.248963  | 2.331340  |
| 28 | 1 | 0 | -4.518354 | 1.060765  | 0.790144  |
| 29 | 6 | 0 | -2.489159 | 1.290214  | -1.144145 |
| 30 | 1 | 0 | -3.212769 | 1.876380  | -0.576283 |
| 31 | 1 | 0 | -3.043572 | 0.858864  | -1.980684 |
| 32 | 6 | 0 | -1.398044 | 2.205470  | -1.664680 |
| 33 | 1 | 0 | -1.839246 | 3.016923  | -2.248906 |
| 34 | 1 | 0 | -0.836378 | 2.654795  | -0.839428 |
| 35 | 1 | 0 | -0.704506 | 1.664522  | -2.317089 |
| 36 | 6 | 0 | -2.381016 | -1.141469 | -0.893897 |
| 37 | 1 | 0 | -3.447046 | -1.069984 | -1.146362 |
| 38 | 6 | 0 | -2.192745 | -2.335546 | 0.036794  |
| 39 | 1 | 0 | -2.868222 | -2.327926 | 0.893629  |
| 40 | 1 | 0 | -2.385309 | -3.249493 | -0.529693 |
| 41 | 1 | 0 | -1.165026 | -2.392120 | 0.410033  |
| 42 | 6 | 0 | 2.184020  | 2.030182  | -0.992053 |
| 43 | 1 | 0 | 1.164164  | 1.772817  | -1.277462 |
| 44 | 1 | 0 | 2.218267  | 3.105104  | -0.798593 |
| 45 | 1 | 0 | 2.840797  | 1.826095  | -1.837087 |
| 46 | 6 | 0 | 2.548254  | -0.843686 | -1.884646 |
| 47 | 1 | 0 | 1.563055  | -0.488383 | -2.207669 |
| 48 | 1 | 0 | 3.291727  | -0.097969 | -2.162866 |
| 49 | 1 | 0 | 2.774945  | -1.754979 | -2.442176 |
| 50 | 6 | 0 | -1.587295 | -1.361037 | -2.178678 |
| 51 | 1 | 0 | -1.633821 | -0.507977 | -2.859773 |
| 52 | 1 | 0 | -0.534463 | -1.547864 | -1.942551 |
| 53 | 1 | 0 | -1.970729 | -2.234700 | -2.710045 |
| 54 | 6 | 0 | -1.965835 | 1.623177  | 1.744873  |

|    |   |   |           |          |          |
|----|---|---|-----------|----------|----------|
| 55 | 1 | 0 | -2.198602 | 1.640013 | 2.812048 |
| 56 | 1 | 0 | -0.879645 | 1.714216 | 1.635413 |
| 57 | 1 | 0 | -2.422369 | 2.507494 | 1.291978 |

## Cu<sup>+</sup>(N<sup>i</sup>Pr<sub>2</sub>Et)<sub>3</sub>

Standard orientation:

| Center<br>Number | Atomic<br>Number | Atomic<br>Type | Coordinates (Angstroms) |           |           |
|------------------|------------------|----------------|-------------------------|-----------|-----------|
|                  |                  |                | X                       | Y         | Z         |
| 1                | 6                | 0              | -1.981379               | -1.313628 | -0.997336 |
| 2                | 6                | 0              | 2.373072                | -1.862538 | 1.369622  |
| 3                | 6                | 0              | 3.046738                | -3.229636 | 1.460813  |
| 4                | 29               | 0              | 1.456226                | 0.462905  | 0.113968  |
| 5                | 1                | 0              | 2.698466                | -1.282329 | 2.240755  |
| 6                | 1                | 0              | 4.130284                | -3.169001 | 1.336130  |
| 7                | 1                | 0              | 2.849259                | -3.646327 | 2.451694  |
| 8                | 1                | 0              | 2.645204                | -3.930198 | 0.724328  |
| 9                | 6                | 0              | 4.092602                | -0.352708 | 0.557499  |
| 10               | 1                | 0              | 3.932221                | 0.183290  | 1.497110  |
| 11               | 1                | 0              | 4.844702                | -1.121630 | 0.768434  |
| 12               | 6                | 0              | 4.633694                | 0.615056  | -0.486381 |
| 13               | 1                | 0              | 4.980330                | 0.110414  | -1.390262 |
| 14               | 1                | 0              | 3.890396                | 1.365012  | -0.781664 |
| 15               | 1                | 0              | 5.484746                | 1.147587  | -0.056095 |
| 16               | 6                | 0              | 2.874852                | -1.628239 | -1.163549 |
| 17               | 1                | 0              | 3.012070                | -0.767723 | -1.827968 |
| 18               | 6                | 0              | 1.579961                | -2.304301 | -1.599406 |
| 19               | 1                | 0              | 0.710282                | -1.656562 | -1.458253 |
| 20               | 1                | 0              | 1.652248                | -2.531973 | -2.666060 |
| 21               | 1                | 0              | 1.402427                | -3.246521 | -1.074421 |
| 22               | 7                | 0              | 2.789983                | -0.996719 | 0.205564  |
| 23               | 7                | 0              | -3.044242               | -0.887700 | -0.084733 |
| 24               | 1                | 0              | -1.832843               | -0.543337 | -1.759505 |
| 25               | 6                | 0              | -2.153645               | -2.669107 | -1.688825 |
| 26               | 1                | 0              | -3.093314               | -2.711820 | -2.249162 |
| 27               | 1                | 0              | -1.335378               | -2.840221 | -2.395252 |
| 28               | 1                | 0              | -2.149441               | -3.491802 | -0.967651 |
| 29               | 6                | 0              | -3.106505               | -1.780252 | 1.102208  |
| 30               | 1                | 0              | -2.144695               | -2.310312 | 1.114511  |
| 31               | 6                | 0              | -3.158602               | -0.992103 | 2.414522  |
| 32               | 1                | 0              | -4.056021               | -0.374822 | 2.492059  |
| 33               | 1                | 0              | -3.146874               | -1.680745 | 3.265346  |
| 34               | 1                | 0              | -2.287664               | -0.336171 | 2.499879  |
| 35               | 6                | 0              | -4.332247               | -0.606839 | -0.747194 |
| 36               | 1                | 0              | -4.835401               | -1.544616 | -1.040279 |
| 37               | 6                | 0              | -4.135976               | 0.219436  | -2.020134 |

|    |   |   |           |           |           |
|----|---|---|-----------|-----------|-----------|
| 38 | 1 | 0 | -3.639164 | -0.336206 | -2.818545 |
| 39 | 1 | 0 | -5.111015 | 0.534983  | -2.398923 |
| 40 | 1 | 0 | -3.549652 | 1.121172  | -1.804400 |
| 41 | 7 | 0 | 0.205658  | 2.016595  | 0.101150  |
| 42 | 6 | 0 | 1.051112  | 3.188459  | 0.514364  |
| 43 | 1 | 0 | 1.570020  | 3.500725  | -0.399268 |
| 44 | 6 | 0 | -0.338378 | 2.100553  | -1.297739 |
| 45 | 1 | 0 | -1.160331 | 1.375018  | -1.310740 |
| 46 | 6 | 0 | -0.851653 | 1.632699  | 1.084633  |
| 47 | 1 | 0 | -1.112928 | 0.589458  | 0.875899  |
| 48 | 6 | 0 | 0.316481  | 4.397588  | 1.096123  |
| 49 | 1 | 0 | -0.114484 | 4.160412  | 2.073578  |
| 50 | 1 | 0 | 1.045853  | 5.197658  | 1.246812  |
| 51 | 1 | 0 | -0.468936 | 4.782620  | 0.447599  |
| 52 | 6 | 0 | 0.717170  | 1.628829  | -2.295752 |
| 53 | 1 | 0 | 1.033611  | 0.604806  | -2.065930 |
| 54 | 1 | 0 | 0.315229  | 1.633687  | -3.311396 |
| 55 | 1 | 0 | 1.603512  | 2.273301  | -2.281995 |
| 56 | 6 | 0 | -4.186962 | -2.871045 | 1.066268  |
| 57 | 1 | 0 | -4.025063 | -3.562080 | 1.898214  |
| 58 | 1 | 0 | -5.195445 | -2.462457 | 1.172367  |
| 59 | 1 | 0 | -4.152465 | -3.447223 | 0.138134  |
| 60 | 6 | 0 | -5.276374 | 0.161448  | 0.179955  |
| 61 | 1 | 0 | -5.572276 | -0.412156 | 1.058831  |
| 62 | 1 | 0 | -4.796892 | 1.085159  | 0.518925  |
| 63 | 1 | 0 | -6.189488 | 0.421866  | -0.362215 |
| 64 | 6 | 0 | -2.174795 | 2.392819  | 1.082097  |
| 65 | 1 | 0 | -2.801155 | 1.965677  | 1.870681  |
| 66 | 1 | 0 | -2.076339 | 3.461406  | 1.271217  |
| 67 | 1 | 0 | -2.709364 | 2.240605  | 0.141073  |
| 68 | 6 | 0 | -0.895462 | 3.456044  | -1.733146 |
| 69 | 1 | 0 | -1.682751 | 3.823457  | -1.074500 |
| 70 | 1 | 0 | -0.107796 | 4.212708  | -1.798176 |
| 71 | 1 | 0 | -1.323895 | 3.343837  | -2.732697 |
| 72 | 6 | 0 | 2.115698  | 2.736742  | 1.514109  |
| 73 | 1 | 0 | 2.748521  | 3.579679  | 1.799813  |
| 74 | 1 | 0 | 1.669187  | 2.332025  | 2.428427  |
| 75 | 1 | 0 | 2.761439  | 1.970495  | 1.077276  |
| 76 | 6 | 0 | 4.060998  | -2.566204 | -1.418679 |
| 77 | 1 | 0 | 4.146996  | -2.700672 | -2.500342 |
| 78 | 1 | 0 | 5.012956  | -2.163494 | -1.067105 |
| 79 | 1 | 0 | 3.918679  | -3.552269 | -0.976312 |
| 80 | 6 | 0 | 0.856563  | -1.990146 | 1.500741  |
| 81 | 1 | 0 | 0.383700  | -1.001003 | 1.482099  |
| 82 | 1 | 0 | 0.411235  | -2.606673 | 0.717465  |
| 83 | 1 | 0 | 0.615107  | -2.448451 | 2.463304  |
| 84 | 1 | 0 | -1.055476 | -1.327498 | -0.410154 |
| 85 | 1 | 0 | -0.394251 | 1.662199  | 2.079489  |

---

## Cu<sup>+</sup>(NMe<sub>3</sub>)

Standard orientation:

| Center<br>Number | Atomic<br>Number | Atomic<br>Type | Coordinates (Angstroms) |           |           |
|------------------|------------------|----------------|-------------------------|-----------|-----------|
|                  |                  |                | X                       | Y         | Z         |
| 1                | 6                | 0              | -1.058890               | -1.031152 | -0.967048 |
| 2                | 29               | 0              | 1.242996                | 0.002206  | 0.027558  |
| 3                | 1                | 0              | -0.650691               | -1.991630 | -0.649457 |
| 4                | 1                | 0              | -2.154936               | -1.109148 | -1.016759 |
| 5                | 6                | 0              | -1.106353               | 1.331341  | -0.442829 |
| 6                | 1                | 0              | -0.639083               | 1.581269  | -1.397316 |
| 7                | 1                | 0              | -2.196982               | 1.339770  | -0.564650 |
| 8                | 6                | 0              | -1.215806               | -0.307885 | 1.324653  |
| 9                | 1                | 0              | -0.963860               | 0.492728  | 2.019870  |
| 10               | 1                | 0              | -2.311332               | -0.382173 | 1.255621  |
| 11               | 7                | 0              | -0.645557               | 0.000946  | 0.004222  |
| 12               | 1                | 0              | -0.830689               | 2.074421  | 0.304567  |
| 13               | 1                | 0              | -0.681125               | -0.775144 | -1.962200 |
| 14               | 1                | 0              | -0.812987               | -1.254497 | 1.692946  |

## Cu<sup>+</sup>(NMe<sub>3</sub>)<sub>2</sub>

Standard orientation:

| Center<br>Number | Atomic<br>Number | Atomic<br>Type | Coordinates (Angstroms) |           |           |
|------------------|------------------|----------------|-------------------------|-----------|-----------|
|                  |                  |                | X                       | Y         | Z         |
| 1                | 6                | 0              | 2.355155                | 0.932560  | 1.053038  |
| 2                | 6                | 0              | -2.432525               | -0.982561 | -0.967674 |
| 3                | 29               | 0              | 0.000355                | 0.013587  | -0.051209 |
| 4                | 1                | 0              | -2.126265               | -0.703718 | -1.977126 |
| 5                | 1                | 0              | -2.037650               | -1.972807 | -0.734697 |
| 6                | 6                | 0              | -2.432075               | 1.342268  | -0.322380 |
| 7                | 1                | 0              | -2.119327               | 1.625624  | -1.328639 |
| 8                | 1                | 0              | -3.528297               | 1.338919  | -0.271323 |
| 9                | 6                | 0              | -2.320893               | -0.378806 | 1.365242  |
| 10               | 1                | 0              | -1.922798               | 0.341758  | 2.081558  |
| 11               | 1                | 0              | -3.415793               | -0.392221 | 1.437955  |
| 12               | 7                | 0              | -1.903484               | 0.001100  | -0.000791 |
| 13               | 7                | 0              | 1.903586                | 0.000331  | -0.000864 |
| 14               | 1                | 0              | 1.927213                | 0.634518  | 2.011709  |
| 15               | 1                | 0              | 2.024403                | 1.943809  | 0.811368  |
| 16               | 6                | 0              | 2.356193                | -1.368003 | 0.324119  |
| 17               | 1                | 0              | 1.938236                | -1.670667 | 1.285714  |
| 18               | 1                | 0              | 3.451679                | -1.401779 | 0.380296  |
| 19               | 6                | 0              | 2.472955                | 0.413466  | -1.299444 |



|    |   |   |           |           |           |
|----|---|---|-----------|-----------|-----------|
| 20 | 1 | 0 | 3.569367  | 0.401292  | -1.251659 |
| 21 | 1 | 0 | 2.139062  | -0.272626 | -2.079389 |
| 22 | 1 | 0 | -1.933476 | -1.371320 | 1.602257  |
| 23 | 1 | 0 | -3.528496 | -1.009777 | -0.917448 |
| 24 | 1 | 0 | -2.041197 | 2.069423  | 0.391291  |
| 25 | 1 | 0 | 3.450002  | 0.918811  | 1.127051  |
| 26 | 1 | 0 | 2.134890  | 1.422268  | -1.541637 |
| 27 | 1 | 0 | 2.014589  | -2.059095 | -0.448046 |

## $\text{Cu}^+(\text{NMe}_3)_3$

Standard orientation:

| Center<br>Number | Atomic<br>Number | Atomic<br>Type | Coordinates (Angstroms) |           |           |
|------------------|------------------|----------------|-------------------------|-----------|-----------|
|                  |                  |                | X                       | Y         | Z         |
| 1                | 6                | 0              | -0.628527               | -2.257777 | 1.392470  |
| 2                | 6                | 0              | -2.087200               | 1.272515  | -1.400702 |
| 3                | 29               | 0              | 0.015173                | 0.035656  | -0.044608 |
| 4                | 1                | 0              | -1.279683               | 1.646209  | -2.035007 |
| 5                | 1                | 0              | -2.357612               | 0.267811  | -1.733582 |
| 6                | 6                | 0              | -1.325579               | 2.602750  | 0.441315  |
| 7                | 1                | 0              | -0.604924               | 3.054564  | -0.240708 |
| 8                | 1                | 0              | -2.233399               | 3.222673  | 0.453103  |
| 9                | 6                | 0              | -2.720424               | 0.721159  | 0.852032  |
| 10               | 1                | 0              | -2.376004               | 0.663030  | 1.887223  |
| 11               | 1                | 0              | -3.597185               | 1.382878  | 0.806236  |
| 12               | 7                | 0              | -1.636020               | 1.233082  | 0.000422  |
| 13               | 7                | 0              | -0.273291               | -1.998109 | -0.012294 |
| 14               | 1                | 0              | -1.523832               | -1.694178 | 1.661186  |
| 15               | 1                | 0              | 0.191418                | -1.944269 | 2.043601  |
| 16               | 6                | 0              | -1.382376               | -2.412398 | -0.886149 |
| 17               | 1                | 0              | -2.293388               | -1.874412 | -0.618707 |
| 18               | 1                | 0              | -1.575056               | -3.490721 | -0.790777 |
| 19               | 6                | 0              | 0.904386                | -2.807887 | -0.360621 |
| 20               | 1                | 0              | 0.683306                | -3.880286 | -0.259663 |
| 21               | 1                | 0              | 1.198775                | -2.602033 | -1.392104 |
| 22               | 7                | 0              | 1.917996                | 0.766944  | -0.012188 |
| 23               | 6                | 0              | 2.011507                | 2.225574  | -0.180466 |
| 24               | 1                | 0              | 1.452324                | 2.724508  | 0.611787  |
| 25               | 1                | 0              | 1.594526                | 2.510442  | -1.149785 |
| 26               | 6                | 0              | 2.419378                | 0.414415  | 1.325991  |
| 27               | 1                | 0              | 3.449071                | 0.771293  | 1.470791  |
| 28               | 1                | 0              | 1.778020                | 0.868491  | 2.085924  |
| 29               | 6                | 0              | 2.760644                | 0.135532  | -1.040695 |
| 30               | 1                | 0              | 2.780392                | -0.944549 | -0.897304 |
| 31               | 1                | 0              | 3.790376                | 0.516909  | -0.988578 |
| 32               | 1                | 0              | 3.059644                | 2.554495  | -0.132949 |

|    |   |   |           |           |           |
|----|---|---|-----------|-----------|-----------|
| 33 | 1 | 0 | -0.900193 | 2.576783  | 1.448009  |
| 34 | 1 | 0 | -2.960872 | 1.929643  | -1.515259 |
| 35 | 1 | 0 | -3.024317 | -0.274010 | 0.523043  |
| 36 | 1 | 0 | -0.821823 | -3.326581 | 1.560545  |
| 37 | 1 | 0 | 1.735800  | -2.564675 | 0.304941  |
| 38 | 1 | 0 | 2.351215  | 0.351725  | -2.030186 |
| 39 | 1 | 0 | 2.404900  | -0.670190 | 1.456648  |
| 40 | 1 | 0 | -1.133142 | -2.186308 | -1.925426 |

## $\text{Cu}^+(\text{NMe}_3)_4$

Standard orientation:

| Center<br>Number | Atomic<br>Number | Atomic<br>Type | Coordinates (Angstroms) |           |           |
|------------------|------------------|----------------|-------------------------|-----------|-----------|
|                  |                  |                | X                       | Y         | Z         |
| 1                | 6                | 0              | -1.629672               | 1.916459  | 1.644389  |
| 2                | 1                | 0              | -1.657344               | 2.585372  | 0.783187  |
| 3                | 1                | 0              | -1.815640               | 2.513267  | 2.549987  |
| 4                | 6                | 0              | 0.711476                | 2.287142  | 1.812953  |
| 5                | 1                | 0              | 0.741252                | 2.874061  | 0.892687  |
| 6                | 1                | 0              | 1.689322                | 1.828285  | 1.966212  |
| 7                | 6                | 0              | 2.632046                | -0.861988 | 1.171609  |
| 8                | 1                | 0              | 2.583323                | -0.006325 | 1.846898  |
| 9                | 1                | 0              | 2.057286                | -1.682861 | 1.604980  |
| 10               | 6                | 0              | 2.296643                | -1.632664 | -1.052332 |
| 11               | 1                | 0              | 1.812856                | -2.525747 | -0.653417 |
| 12               | 1                | 0              | 3.369793                | -1.846080 | -1.169409 |
| 13               | 6                | 0              | -1.268509               | -2.498029 | -1.093121 |
| 14               | 1                | 0              | -1.821423               | -1.881847 | -1.803951 |
| 15               | 1                | 0              | -1.804080               | -3.452098 | -0.976806 |
| 16               | 6                | 0              | -0.066162               | 0.407079  | -2.975120 |
| 17               | 1                | 0              | 1.023539                | 0.460696  | -2.968792 |
| 18               | 1                | 0              | -0.363992               | -0.642757 | -3.009638 |
| 19               | 6                | 0              | -0.136313               | 2.442141  | -1.749327 |
| 20               | 1                | 0              | -0.395482               | 2.958288  | -2.685933 |
| 21               | 1                | 0              | -0.601895               | 2.981717  | -0.923444 |
| 22               | 6                | 0              | -2.513179               | -1.508108 | 0.673204  |
| 23               | 1                | 0              | -2.472422               | -1.077708 | 1.674917  |
| 24               | 1                | 0              | -3.000789               | -0.794464 | 0.005924  |
| 25               | 6                | 0              | -2.074184               | 1.073068  | -1.892422 |
| 26               | 1                | 0              | -2.384843               | 1.660296  | -2.769629 |
| 27               | 1                | 0              | -2.454371               | 0.057460  | -2.009877 |
| 28               | 6                | 0              | 2.862260                | 0.641578  | -0.654773 |
| 29               | 1                | 0              | 3.937319                | 0.407495  | -0.669437 |
| 30               | 1                | 0              | 2.551781                | 0.879360  | -1.673184 |
| 31               | 6                | 0              | -0.527420               | -2.723715 | 1.154532  |
| 32               | 1                | 0              | 0.447660                | -3.041791 | 0.782850  |

|    |    |   |           |           |           |
|----|----|---|-----------|-----------|-----------|
| 33 | 1  | 0 | -1.148932 | -3.620025 | 1.299388  |
| 34 | 6  | 0 | -0.286799 | 0.458889  | 2.958371  |
| 35 | 1  | 0 | -0.389881 | 1.109709  | 3.839649  |
| 36 | 1  | 0 | -1.108113 | -0.259436 | 2.968129  |
| 37 | 7  | 0 | 2.082791  | -0.496244 | -0.143230 |
| 38 | 7  | 0 | -0.608620 | 1.049229  | -1.768275 |
| 39 | 7  | 0 | -0.322462 | 1.245738  | 1.715696  |
| 40 | 7  | 0 | -1.152536 | -1.799469 | 0.196143  |
| 41 | 29 | 0 | 0.000005  | -0.000543 | 0.000792  |
| 42 | 1  | 0 | -3.120081 | -2.424969 | 0.718088  |
| 43 | 1  | 0 | -0.276379 | -2.698682 | -1.502796 |
| 44 | 1  | 0 | -0.389577 | -2.230474 | 2.118995  |
| 45 | 1  | 0 | 3.683965  | -1.172525 | 1.085500  |
| 46 | 1  | 0 | 0.655974  | -0.087151 | 3.031693  |
| 47 | 1  | 0 | 2.702234  | 1.520048  | -0.026442 |
| 48 | 1  | 0 | 1.871824  | -1.414278 | -2.034465 |
| 49 | 1  | 0 | -0.429147 | 0.909054  | -3.884609 |
| 50 | 1  | 0 | -2.521742 | 1.512424  | -0.998394 |
| 51 | 1  | 0 | 0.947594  | 2.471125  | -1.618973 |
| 52 | 1  | 0 | 0.511777  | 2.962673  | 2.658285  |
| 53 | 1  | 0 | -2.426827 | 1.177746  | 1.538755  |

## Cu<sup>+</sup>[(3,5-diMeC<sub>6</sub>H<sub>3</sub>)<sub>2</sub>POH]

Standard orientation:

| Center<br>Number | Atomic<br>Number | Atomic<br>Type | Coordinates (Angstroms) |           |           |
|------------------|------------------|----------------|-------------------------|-----------|-----------|
|                  |                  |                | X                       | Y         | Z         |
| 1                | 15               | 0              | -0.015162               | -1.071495 | -0.494367 |
| 2                | 6                | 0              | -1.497286               | -0.115314 | -0.109967 |
| 3                | 6                | 0              | -1.483279               | 0.811704  | 0.938856  |
| 4                | 6                | 0              | -2.672609               | -0.374151 | -0.811085 |
| 5                | 6                | 0              | -2.646045               | 1.495887  | 1.280867  |
| 6                | 1                | 0              | -0.561104               | 1.013479  | 1.478816  |
| 7                | 6                | 0              | -3.849792               | 0.309557  | -0.486832 |
| 8                | 1                | 0              | -2.675970               | -1.101104 | -1.619747 |
| 9                | 6                | 0              | -3.815328               | 1.232449  | 0.555846  |
| 10               | 6                | 0              | 1.371317                | 0.070852  | -0.351219 |
| 11               | 6                | 0              | 2.547085                | -0.453963 | 0.181147  |
| 12               | 6                | 0              | 1.323832                | 1.399650  | -0.787692 |
| 13               | 6                | 0              | 3.697090                | 0.331127  | 0.288777  |
| 14               | 1                | 0              | 2.551941                | -1.489433 | 0.516512  |
| 15               | 6                | 0              | 2.458158                | 2.201782  | -0.697586 |
| 16               | 1                | 0              | 0.399151                | 1.812808  | -1.184300 |
| 17               | 6                | 0              | 3.628896                | 1.648549  | -0.160513 |
| 18               | 1                | 0              | -4.725083               | 1.769453  | 0.816095  |
| 19               | 1                | 0              | 4.516631                | 2.274153  | -0.090216 |

|    |    |   |           |           |           |
|----|----|---|-----------|-----------|-----------|
| 20 | 29 | 0 | 0.398262  | -2.821212 | 0.667084  |
| 21 | 8  | 0 | -0.181109 | -1.478761 | -2.069994 |
| 22 | 1  | 0 | -0.311915 | -0.720616 | -2.661891 |
| 23 | 6  | 0 | -5.118900 | 0.038587  | -1.252332 |
| 24 | 1  | 0 | -4.968053 | 0.192843  | -2.324329 |
| 25 | 1  | 0 | -5.442450 | -0.997289 | -1.114173 |
| 26 | 1  | 0 | -5.926995 | 0.694032  | -0.922856 |
| 27 | 6  | 0 | -2.659828 | 2.504706  | 2.399432  |
| 28 | 1  | 0 | -2.996549 | 3.480439  | 2.038338  |
| 29 | 1  | 0 | -3.348360 | 2.195534  | 3.191203  |
| 30 | 1  | 0 | -1.667651 | 2.625750  | 2.838036  |
| 31 | 6  | 0 | 2.442565  | 3.634919  | -1.161033 |
| 32 | 1  | 0 | 2.690661  | 4.311271  | -0.338222 |
| 33 | 1  | 0 | 3.183250  | 3.794538  | -1.949602 |
| 34 | 1  | 0 | 1.462174  | 3.915131  | -1.550369 |
| 35 | 6  | 0 | 4.957640  | -0.226461 | 0.895001  |
| 36 | 1  | 0 | 4.907363  | -0.189882 | 1.987797  |
| 37 | 1  | 0 | 5.106052  | -1.269647 | 0.606012  |
| 38 | 1  | 0 | 5.832503  | 0.346917  | 0.582897  |

## Cu<sup>+</sup>[(3,5-diMeC<sub>6</sub>H<sub>3</sub>)<sub>2</sub>POH]<sub>4</sub>

Standard orientation:

| Center<br>Number | Atomic<br>Number | Atomic<br>Type | Coordinates (Angstroms) |           |           |
|------------------|------------------|----------------|-------------------------|-----------|-----------|
|                  |                  |                | X                       | Y         | Z         |
| 1                | 15               | 0              | 1.388300                | 1.600538  | -1.143112 |
| 2                | 15               | 0              | -0.156759               | 0.214577  | 2.145365  |
| 3                | 6                | 0              | 0.446016                | 3.139484  | -1.362496 |
| 4                | 6                | 0              | -0.062199               | 3.756886  | -0.211921 |
| 5                | 6                | 0              | 0.166486                | 3.666178  | -2.619698 |
| 6                | 6                | 0              | -0.775701               | 4.948534  | -0.307883 |
| 7                | 1                | 0              | 0.098658                | 3.307012  | 0.768958  |
| 8                | 6                | 0              | -0.594354               | 4.834813  | -2.741272 |
| 9                | 1                | 0              | 0.523952                | 3.164593  | -3.515749 |
| 10               | 6                | 0              | -1.035556               | 5.468455  | -1.581166 |
| 11               | 6                | 0              | 1.338857                | -0.432972 | 2.957715  |
| 12               | 6                | 0              | 2.493574                | 0.338355  | 2.807667  |
| 13               | 6                | 0              | 1.397863                | -1.665500 | 3.613044  |
| 14               | 6                | 0              | 3.710506                | -0.093417 | 3.340020  |
| 15               | 1                | 0              | 2.447951                | 1.290824  | 2.278522  |
| 16               | 6                | 0              | 2.606868                | -2.122403 | 4.138449  |
| 17               | 1                | 0              | 0.502136                | -2.271142 | 3.721766  |
| 18               | 6                | 0              | 3.745409                | -1.320418 | 4.002429  |
| 19               | 1                | 0              | 4.687788                | -1.668633 | 4.421872  |
| 20               | 1                | 0              | -1.612646               | 6.387948  | -1.666466 |
| 21               | 15               | 0              | 0.918991                | -2.097669 | -0.582239 |

|    |    |   |           |           |           |
|----|----|---|-----------|-----------|-----------|
| 22 | 6  | 0 | 0.243299  | -2.843422 | -2.096382 |
| 23 | 6  | 0 | 0.053478  | -1.995530 | -3.191206 |
| 24 | 6  | 0 | -0.162446 | -4.176104 | -2.163032 |
| 25 | 6  | 0 | -0.544825 | -2.470148 | -4.358649 |
| 26 | 6  | 0 | -0.742051 | -4.678701 | -3.330270 |
| 27 | 1  | 0 | -0.045660 | -4.830523 | -1.302609 |
| 28 | 6  | 0 | -0.933733 | -3.811234 | -4.409389 |
| 29 | 1  | 0 | -1.405661 | -4.191413 | -5.314037 |
| 30 | 1  | 0 | 0.347232  | -0.948126 | -3.132659 |
| 31 | 15 | 0 | -2.062088 | 0.279144  | -1.135835 |
| 32 | 6  | 0 | -3.292759 | -1.026183 | -0.782734 |
| 33 | 6  | 0 | -3.206561 | -2.208861 | -1.524928 |
| 34 | 6  | 0 | -4.242404 | -0.912926 | 0.236210  |
| 35 | 6  | 0 | -4.074808 | -3.272629 | -1.266804 |
| 36 | 1  | 0 | -2.467952 | -2.306768 | -2.318988 |
| 37 | 6  | 0 | -5.124705 | -1.959852 | 0.501263  |
| 38 | 6  | 0 | -5.026272 | -3.129337 | -0.256700 |
| 39 | 6  | 0 | -2.900670 | 1.828282  | -0.680055 |
| 40 | 6  | 0 | -3.380955 | 2.712857  | -1.641215 |
| 41 | 6  | 0 | -2.992272 | 2.157911  | 0.676506  |
| 42 | 6  | 0 | -3.993582 | 3.910435  | -1.257716 |
| 43 | 6  | 0 | -3.619901 | 3.332121  | 1.082664  |
| 44 | 1  | 0 | -2.574079 | 1.496203  | 1.432825  |
| 45 | 6  | 0 | -4.121118 | 4.192879  | 0.101304  |
| 46 | 1  | 0 | -5.710520 | -3.951188 | -0.052343 |
| 47 | 1  | 0 | -4.600229 | 5.121176  | 0.407027  |
| 48 | 1  | 0 | -4.310247 | -0.004490 | 0.828956  |
| 49 | 1  | 0 | -3.259414 | 2.492313  | -2.699104 |
| 50 | 6  | 0 | -1.568851 | -0.637907 | 2.907162  |
| 51 | 6  | 0 | -2.440372 | 0.022869  | 3.776073  |
| 52 | 6  | 0 | -1.838960 | -1.949726 | 2.509719  |
| 53 | 6  | 0 | -3.572398 | -0.625991 | 4.270178  |
| 54 | 1  | 0 | -2.251911 | 1.055858  | 4.057871  |
| 55 | 6  | 0 | -2.956428 | -2.623512 | 3.006775  |
| 56 | 1  | 0 | -1.181053 | -2.456129 | 1.804037  |
| 57 | 6  | 0 | -3.805242 | -1.949381 | 3.885321  |
| 58 | 1  | 0 | -4.687621 | -2.460996 | 4.266391  |
| 59 | 6  | 0 | 3.022717  | 2.145751  | -0.527450 |
| 60 | 6  | 0 | 3.198476  | 3.323047  | 0.206501  |
| 61 | 6  | 0 | 4.122061  | 1.322552  | -0.793340 |
| 62 | 6  | 0 | 4.462324  | 3.690265  | 0.668860  |
| 63 | 1  | 0 | 2.355425  | 3.978277  | 0.404308  |
| 64 | 6  | 0 | 5.402219  | 1.692068  | -0.368882 |
| 65 | 1  | 0 | 3.991108  | 0.401419  | -1.359383 |
| 66 | 6  | 0 | 5.551475  | 2.872774  | 0.358593  |
| 67 | 1  | 0 | 6.544722  | 3.165216  | 0.694634  |
| 68 | 6  | 0 | 2.726030  | -2.190819 | -0.796777 |
| 69 | 6  | 0 | 3.322538  | -2.131971 | -2.058427 |
| 70 | 6  | 0 | 3.515897  | -2.275666 | 0.353727  |
| 71 | 6  | 0 | 4.711116  | -2.180724 | -2.183273 |

|     |    |   |           |           |           |
|-----|----|---|-----------|-----------|-----------|
| 72  | 1  | 0 | 2.707877  | -2.062632 | -2.952134 |
| 73  | 6  | 0 | 4.906899  | -2.356350 | 0.246797  |
| 74  | 1  | 0 | 3.046798  | -2.307972 | 1.337354  |
| 75  | 6  | 0 | 5.481184  | -2.312746 | -1.024765 |
| 76  | 1  | 0 | 6.563543  | -2.382814 | -1.117284 |
| 77  | 29 | 0 | 0.048744  | 0.009270  | -0.132256 |
| 78  | 8  | 0 | 1.738174  | 1.073060  | -2.665472 |
| 79  | 1  | 0 | 2.358905  | 1.647379  | -3.140499 |
| 80  | 8  | 0 | 0.646588  | -3.199229 | 0.612690  |
| 81  | 1  | 0 | 1.201631  | -3.991392 | 0.543885  |
| 82  | 8  | 0 | -0.246935 | 1.764044  | 2.704906  |
| 83  | 1  | 0 | -0.054453 | 1.841007  | 3.652427  |
| 84  | 8  | 0 | -2.007378 | 0.305336  | -2.781416 |
| 85  | 1  | 0 | -2.882115 | 0.225112  | -3.192470 |
| 86  | 6  | 0 | 2.698975  | -3.454154 | 4.838151  |
| 87  | 1  | 0 | 3.155710  | -3.347256 | 5.825874  |
| 88  | 1  | 0 | 1.713042  | -3.905835 | 4.963230  |
| 89  | 1  | 0 | 3.320865  | -4.149837 | 4.265564  |
| 90  | 6  | 0 | 4.949523  | 0.744232  | 3.167273  |
| 91  | 1  | 0 | 5.277104  | 0.724900  | 2.122086  |
| 92  | 1  | 0 | 4.756208  | 1.791934  | 3.416357  |
| 93  | 1  | 0 | 5.768079  | 0.382463  | 3.793899  |
| 94  | 6  | 0 | 4.657938  | 4.946053  | 1.478470  |
| 95  | 1  | 0 | 5.493128  | 5.536698  | 1.092770  |
| 96  | 1  | 0 | 3.761384  | 5.569111  | 1.467741  |
| 97  | 1  | 0 | 4.886082  | 4.701606  | 2.520957  |
| 98  | 6  | 0 | 6.598380  | 0.824545  | -0.664427 |
| 99  | 1  | 0 | 6.722363  | 0.056512  | 0.108155  |
| 100 | 1  | 0 | 6.484842  | 0.304871  | -1.619011 |
| 101 | 1  | 0 | 7.514792  | 1.418328  | -0.694573 |
| 102 | 6  | 0 | 5.769596  | -2.492867 | 1.474686  |
| 103 | 1  | 0 | 5.912818  | -1.523239 | 1.963855  |
| 104 | 1  | 0 | 5.306937  | -3.157743 | 2.209095  |
| 105 | 1  | 0 | 6.755605  | -2.887957 | 1.219349  |
| 106 | 6  | 0 | 5.367604  | -2.078106 | -3.535671 |
| 107 | 1  | 0 | 6.303818  | -2.640007 | -3.565369 |
| 108 | 1  | 0 | 4.711535  | -2.453069 | -4.324312 |
| 109 | 1  | 0 | 5.601705  | -1.033663 | -3.770417 |
| 110 | 6  | 0 | -1.141599 | -6.127901 | -3.436273 |
| 111 | 1  | 0 | -2.124260 | -6.234609 | -3.903988 |
| 112 | 1  | 0 | -0.424049 | -6.680315 | -4.051154 |
| 113 | 1  | 0 | -1.174857 | -6.603437 | -2.453201 |
| 114 | 6  | 0 | -0.807483 | -1.545394 | -5.518315 |
| 115 | 1  | 0 | -0.414831 | -1.958184 | -6.451587 |
| 116 | 1  | 0 | -1.883570 | -1.396544 | -5.653725 |
| 117 | 1  | 0 | -0.352136 | -0.567517 | -5.349924 |
| 118 | 6  | 0 | -3.960063 | -4.556333 | -2.046689 |
| 119 | 1  | 0 | -3.647489 | -4.362858 | -3.076613 |
| 120 | 1  | 0 | -3.204972 | -5.212121 | -1.598260 |
| 121 | 1  | 0 | -4.907973 | -5.099097 | -2.061998 |

|     |   |   |           |           |           |
|-----|---|---|-----------|-----------|-----------|
| 122 | 6 | 0 | -6.190407 | -1.823641 | 1.558010  |
| 123 | 1 | 0 | -7.170608 | -1.656383 | 1.099897  |
| 124 | 1 | 0 | -6.263771 | -2.732815 | 2.162431  |
| 125 | 1 | 0 | -5.977789 | -0.985436 | 2.225586  |
| 126 | 6 | 0 | -4.535686 | 0.081442  | 5.188260  |
| 127 | 1 | 0 | -5.527425 | 0.154449  | 4.730721  |
| 128 | 1 | 0 | -4.651720 | -0.462879 | 6.129759  |
| 129 | 1 | 0 | -4.193920 | 1.092882  | 5.418270  |
| 130 | 6 | 0 | -3.232487 | -4.047004 | 2.597811  |
| 131 | 1 | 0 | -2.790639 | -4.749338 | 3.312477  |
| 132 | 1 | 0 | -4.307061 | -4.245338 | 2.559481  |
| 133 | 1 | 0 | -2.810212 | -4.256568 | 1.611490  |
| 134 | 6 | 0 | -1.224122 | 5.676974  | 0.931386  |
| 135 | 1 | 0 | -0.511988 | 6.468430  | 1.188997  |
| 136 | 1 | 0 | -2.202062 | 6.143085  | 0.786747  |
| 137 | 1 | 0 | -1.289567 | 4.994279  | 1.782554  |
| 138 | 6 | 0 | -0.936811 | 5.376845  | -4.105611 |
| 139 | 1 | 0 | -1.378004 | 6.373782  | -4.036693 |
| 140 | 1 | 0 | -0.049844 | 5.436835  | -4.742355 |
| 141 | 1 | 0 | -1.656090 | 4.723429  | -4.611077 |
| 142 | 6 | 0 | -4.478628 | 4.877593  | -2.305723 |
| 143 | 1 | 0 | -5.213745 | 4.409551  | -2.966912 |
| 144 | 1 | 0 | -4.938390 | 5.758149  | -1.852018 |
| 145 | 1 | 0 | -3.643145 | 5.212691  | -2.929679 |
| 146 | 6 | 0 | -3.740743 | 3.654059  | 2.549764  |
| 147 | 1 | 0 | -4.585502 | 3.121650  | 3.000202  |
| 148 | 1 | 0 | -2.835893 | 3.348375  | 3.084062  |
| 149 | 1 | 0 | -3.893438 | 4.723973  | 2.711335  |

## $\text{Cu}^+(\text{PPh}_2\text{OH})(\text{PPh}_2\text{O}^-)$ (4')

Standard orientation:

| Center<br>Number | Atomic<br>Number | Atomic<br>Type | Coordinates (Angstroms) |           |           |
|------------------|------------------|----------------|-------------------------|-----------|-----------|
|                  |                  |                | X                       | Y         | Z         |
| 1                | 15               | 0              | 2.824021                | -1.463296 | -1.021492 |
| 2                | 6                | 0              | 3.930131                | -0.193239 | -0.249119 |
| 3                | 6                | 0              | 4.019907                | 1.092229  | -0.785033 |
| 4                | 6                | 0              | 4.728483                | -0.529285 | 0.850404  |
| 5                | 6                | 0              | 4.885969                | 2.032723  | -0.224693 |
| 6                | 1                | 0              | 3.405593                | 1.341881  | -1.646205 |
| 7                | 6                | 0              | 5.588378                | 0.407419  | 1.413434  |
| 8                | 1                | 0              | 4.667708                | -1.530506 | 1.274450  |
| 9                | 6                | 0              | 5.669785                | 1.692771  | 0.874402  |
| 10               | 1                | 0              | 6.345304                | 2.422850  | 1.309234  |
| 11               | 1                | 0              | 4.950673                | 3.030637  | -0.648621 |
| 12               | 1                | 0              | 6.197079                | 0.138826  | 2.271601  |

|    |    |   |           |           |           |
|----|----|---|-----------|-----------|-----------|
| 13 | 15 | 0 | -1.751517 | 0.533589  | -1.095686 |
| 14 | 6  | 0 | -2.130892 | 1.924583  | 0.010819  |
| 15 | 6  | 0 | -2.517289 | 1.735662  | 1.341270  |
| 16 | 6  | 0 | -1.951919 | 3.222133  | -0.482336 |
| 17 | 6  | 0 | -2.723556 | 2.836802  | 2.168391  |
| 18 | 1  | 0 | -2.665868 | 0.730477  | 1.726502  |
| 19 | 6  | 0 | -2.168509 | 4.319140  | 0.345050  |
| 20 | 6  | 0 | -2.551457 | 4.126991  | 1.671341  |
| 21 | 1  | 0 | -3.027018 | 2.686566  | 3.199309  |
| 22 | 1  | 0 | -2.036945 | 5.323140  | -0.044614 |
| 23 | 1  | 0 | -2.718323 | 4.982812  | 2.317318  |
| 24 | 1  | 0 | -1.653073 | 3.368925  | -1.516703 |
| 25 | 6  | 0 | 1.615286  | -1.559388 | 0.405011  |
| 26 | 6  | 0 | 1.083379  | -0.391238 | 0.980096  |
| 27 | 6  | 0 | 1.187797  | -2.796495 | 0.889662  |
| 28 | 6  | 0 | 0.159472  | -0.466611 | 2.020026  |
| 29 | 1  | 0 | 1.481725  | 0.583363  | 0.690859  |
| 30 | 6  | 0 | 0.254711  | -2.875572 | 1.926499  |
| 31 | 1  | 0 | 1.595430  | -3.706654 | 0.456548  |
| 32 | 6  | 0 | -0.263639 | -1.711902 | 2.487853  |
| 33 | 1  | 0 | -0.215797 | 0.444963  | 2.475595  |
| 34 | 1  | 0 | -0.067258 | -3.845226 | 2.294001  |
| 35 | 1  | 0 | -0.986639 | -1.772115 | 3.295293  |
| 36 | 6  | 0 | -2.801828 | -0.813411 | -0.492987 |
| 37 | 6  | 0 | -4.177971 | -0.677517 | -0.272334 |
| 38 | 6  | 0 | -2.179622 | -2.040503 | -0.261195 |
| 39 | 6  | 0 | -4.919739 | -1.769939 | 0.160583  |
| 40 | 1  | 0 | -4.666941 | 0.281989  | -0.423341 |
| 41 | 6  | 0 | -2.920400 | -3.131191 | 0.186308  |
| 42 | 1  | 0 | -1.106410 | -2.125895 | -0.414164 |
| 43 | 6  | 0 | -4.290318 | -2.996027 | 0.388741  |
| 44 | 1  | 0 | -5.986861 | -1.667849 | 0.327735  |
| 45 | 1  | 0 | -2.426475 | -4.079041 | 0.373831  |
| 46 | 1  | 0 | -4.873717 | -3.845276 | 0.729677  |
| 47 | 29 | 0 | 0.318452  | -0.077625 | -1.351228 |
| 48 | 8  | 0 | -2.392443 | 1.030249  | -2.526458 |
| 49 | 1  | 0 | -3.305406 | 1.349182  | -2.460197 |
| 50 | 8  | 0 | 1.969140  | -0.598392 | -2.068290 |

---



## **Cu<sup>+</sup>(PPh<sub>2</sub>OH)(PPh<sub>2</sub>O<sup>-</sup>)---PhBr (5)**

Standard orientation:

| Center<br>Number | Atomic<br>Number | Atomic<br>Type | Coordinates (Angstroms) |           |           |
|------------------|------------------|----------------|-------------------------|-----------|-----------|
|                  |                  |                | X                       | Y         | Z         |
| 1                | 15               | 0              | 2.289007                | 0.914825  | -0.638234 |
| 2                | 6                | 0              | 3.070591                | 0.651909  | 0.978408  |
| 3                | 6                | 0              | 4.336744                | 0.072032  | 1.076644  |
| 4                | 6                | 0              | 2.322436                | 0.893512  | 2.135989  |
| 5                | 6                | 0              | 4.858265                | -0.249846 | 2.328904  |
| 6                | 1                | 0              | 4.912031                | -0.117028 | 0.175409  |
| 7                | 6                | 0              | 2.845035                | 0.567267  | 3.382929  |
| 8                | 1                | 0              | 1.328362                | 1.328519  | 2.055529  |
| 9                | 6                | 0              | 4.114010                | -0.004413 | 3.480815  |
| 10               | 1                | 0              | 4.521206                | -0.257694 | 4.454418  |
| 11               | 1                | 0              | 5.846613                | -0.691824 | 2.404592  |
| 12               | 1                | 0              | 2.263478                | 0.759426  | 4.278677  |
| 13               | 15               | 0              | -1.674365               | 0.137340  | 0.400842  |
| 14               | 6                | 0              | -2.750553               | 1.601074  | 0.017668  |
| 15               | 6                | 0              | -3.157012               | 2.476197  | 1.028011  |
| 16               | 6                | 0              | -3.097598               | 1.885023  | -1.305542 |
| 17               | 6                | 0              | -3.909928               | 3.608733  | 0.725487  |
| 18               | 1                | 0              | -2.872578               | 2.278037  | 2.060100  |
| 19               | 6                | 0              | -3.847787               | 3.019294  | -1.613048 |
| 20               | 6                | 0              | -4.255402               | 3.883873  | -0.597510 |
| 21               | 1                | 0              | -4.219770               | 4.282681  | 1.518702  |
| 22               | 1                | 0              | -4.112413               | 3.232528  | -2.644927 |
| 23               | 1                | 0              | -4.834417               | 4.770549  | -0.836537 |
| 24               | 1                | 0              | -2.756234               | 1.206901  | -2.083722 |
| 25               | 6                | 0              | 1.626958                | 2.597240  | -0.495877 |
| 26               | 6                | 0              | 2.369183                | 3.668171  | 0.016405  |
| 27               | 6                | 0              | 0.301797                | 2.792213  | -0.890633 |
| 28               | 6                | 0              | 1.781443                | 4.922828  | 0.125420  |
| 29               | 1                | 0              | 3.395544                | 3.512484  | 0.338922  |
| 30               | 6                | 0              | -0.295245               | 4.044741  | -0.755832 |
| 31               | 1                | 0              | -0.266283               | 1.950542  | -1.279886 |
| 32               | 6                | 0              | 0.449044                | 5.107667  | -0.253734 |
| 33               | 1                | 0              | 2.353474                | 5.756953  | 0.518986  |
| 34               | 1                | 0              | -1.337966               | 4.174817  | -1.033058 |
| 35               | 1                | 0              | -0.008228               | 6.086393  | -0.146703 |
| 36               | 6                | 0              | -3.024907               | -1.049018 | 0.850881  |
| 37               | 6                | 0              | -3.516071               | -1.944536 | -0.102516 |
| 38               | 6                | 0              | -3.512663               | -1.111655 | 2.158352  |
| 39               | 6                | 0              | -4.482203               | -2.886068 | 0.245102  |
| 40               | 1                | 0              | -3.114520               | -1.891163 | -1.111532 |
| 41               | 6                | 0              | -4.485799               | -2.045755 | 2.507336  |
| 42               | 1                | 0              | -3.119352               | -0.432816 | 2.913166  |
| 43               | 6                | 0              | -4.969513               | -2.938056 | 1.551096  |

|    |    |   |           |           |           |
|----|----|---|-----------|-----------|-----------|
| 44 | 1  | 0 | -4.858558 | -3.580893 | -0.500376 |
| 45 | 1  | 0 | -4.859631 | -2.086700 | 3.526133  |
| 46 | 1  | 0 | -5.719860 | -3.673883 | 1.823866  |
| 47 | 29 | 0 | 0.680364  | -0.542018 | -1.044704 |
| 48 | 8  | 0 | -1.246425 | -0.358535 | -1.057365 |
| 49 | 8  | 0 | 3.626117  | 1.031742  | -1.597729 |
| 50 | 1  | 0 | 3.470641  | 0.597742  | -2.446686 |
| 51 | 6  | 0 | 0.894163  | -2.791935 | -0.663921 |
| 52 | 6  | 0 | 1.970677  | -2.447679 | 0.152780  |
| 53 | 6  | 0 | 1.799498  | -2.508654 | 1.538205  |
| 54 | 6  | 0 | 0.585118  | -2.921266 | 2.074708  |
| 55 | 6  | 0 | -0.468185 | -3.289980 | 1.233891  |
| 56 | 6  | 0 | -0.320153 | -3.237972 | -0.146823 |
| 57 | 1  | 0 | 2.926885  | -2.162155 | -0.274014 |
| 58 | 1  | 0 | 2.624267  | -2.219217 | 2.183221  |
| 59 | 1  | 0 | 0.453476  | -2.955344 | 3.150781  |
| 60 | 1  | 0 | -1.422393 | -3.598971 | 1.649538  |
| 61 | 1  | 0 | -1.144964 | -3.479724 | -0.806445 |
| 62 | 35 | 0 | 1.119195  | -2.640841 | -2.556905 |

## TS[Cu<sup>+</sup>(PPh<sub>2</sub>OH)(PPh<sub>2</sub>O<sup>-</sup>)...Ph...Br] (TS5,6)

Standard orientation:

| Center<br>Number | Atomic<br>Number | Atomic<br>Type | Coordinates (Angstroms) |           |           |
|------------------|------------------|----------------|-------------------------|-----------|-----------|
|                  |                  |                | X                       | Y         | Z         |
| 1                | 15               | 0              | -1.379019               | -1.447706 | 0.062034  |
| 2                | 6                | 0              | -0.214132               | -2.200104 | 1.214652  |
| 3                | 6                | 0              | -0.063799               | -1.621098 | 2.479963  |
| 4                | 6                | 0              | 0.457568                | -3.383345 | 0.895794  |
| 5                | 6                | 0              | 0.743480                | -2.237878 | 3.429303  |
| 6                | 1                | 0              | -0.561891               | -0.685667 | 2.726340  |
| 7                | 6                | 0              | 1.274001                | -3.987032 | 1.847673  |
| 8                | 1                | 0              | 0.344829                | -3.830330 | -0.087099 |
| 9                | 6                | 0              | 1.411164                | -3.419333 | 3.112305  |
| 10               | 1                | 0              | 2.048729                | -3.893697 | 3.851503  |
| 11               | 1                | 0              | 0.860959                | -1.789025 | 4.409755  |
| 12               | 1                | 0              | 1.804199                | -4.900077 | 1.599189  |
| 13               | 15               | 0              | 1.716694                | 0.868191  | 0.824384  |
| 14               | 6                | 0              | 2.973825                | -0.427572 | 0.410113  |
| 15               | 6                | 0              | 3.499347                | -1.225229 | 1.425563  |
| 16               | 6                | 0              | 3.367936                | -0.666337 | -0.913570 |
| 17               | 6                | 0              | 4.397210                | -2.253247 | 1.130323  |
| 18               | 1                | 0              | 3.196237                | -1.049015 | 2.454577  |
| 19               | 6                | 0              | 4.254803                | -1.694100 | -1.213597 |
| 20               | 6                | 0              | 4.770576                | -2.490803 | -0.188070 |
| 21               | 1                | 0              | 4.795132                | -2.871563 | 1.929582  |

|    |    |   |           |           |           |
|----|----|---|-----------|-----------|-----------|
| 22 | 1  | 0 | 4.552500  | -1.873960 | -2.242546 |
| 23 | 1  | 0 | 5.464480  | -3.292603 | -0.421155 |
| 24 | 1  | 0 | 2.967707  | -0.037162 | -1.706655 |
| 25 | 6  | 0 | -1.011832 | -1.931443 | -1.627188 |
| 26 | 6  | 0 | -2.077685 | -2.249641 | -2.475743 |
| 27 | 6  | 0 | 0.303553  | -1.916882 | -2.105507 |
| 28 | 6  | 0 | -1.820246 | -2.567473 | -3.805986 |
| 29 | 1  | 0 | -3.092553 | -2.262482 | -2.091472 |
| 30 | 6  | 0 | 0.547494  | -2.243593 | -3.434325 |
| 31 | 1  | 0 | 1.117424  | -1.650309 | -1.439706 |
| 32 | 6  | 0 | -0.511192 | -2.565890 | -4.283144 |
| 33 | 1  | 0 | -2.641979 | -2.820141 | -4.467304 |
| 34 | 1  | 0 | 1.566919  | -2.244006 | -3.806582 |
| 35 | 1  | 0 | -0.314462 | -2.817087 | -5.320369 |
| 36 | 6  | 0 | 2.507801  | 2.271898  | -0.075929 |
| 37 | 6  | 0 | 1.952688  | 2.804164  | -1.240650 |
| 38 | 6  | 0 | 3.665322  | 2.850534  | 0.454992  |
| 39 | 6  | 0 | 2.551966  | 3.895870  | -1.868948 |
| 40 | 1  | 0 | 1.052549  | 2.351851  | -1.646779 |
| 41 | 6  | 0 | 4.267043  | 3.935762  | -0.173658 |
| 42 | 1  | 0 | 4.101543  | 2.445282  | 1.366602  |
| 43 | 6  | 0 | 3.707804  | 4.463259  | -1.337865 |
| 44 | 1  | 0 | 2.114951  | 4.305148  | -2.775072 |
| 45 | 1  | 0 | 5.168043  | 4.374267  | 0.244493  |
| 46 | 1  | 0 | 4.171557  | 5.314490  | -1.826474 |
| 47 | 29 | 0 | -1.258082 | 0.757568  | 0.207390  |
| 48 | 8  | 0 | 0.534195  | 0.446313  | -0.208559 |
| 49 | 8  | 0 | -2.791428 | -2.184908 | 0.365565  |
| 50 | 1  | 0 | -3.478010 | -1.556744 | 0.647179  |
| 51 | 6  | 0 | -3.145838 | 0.666678  | 0.329709  |
| 52 | 6  | 0 | -3.869913 | 0.694727  | -0.861482 |
| 53 | 6  | 0 | -5.265358 | 0.686267  | -0.819514 |
| 54 | 6  | 0 | -5.930512 | 0.636845  | 0.402793  |
| 55 | 6  | 0 | -5.200875 | 0.601514  | 1.589258  |
| 56 | 6  | 0 | -3.804857 | 0.618470  | 1.557537  |
| 57 | 1  | 0 | -3.363392 | 0.721267  | -1.823822 |
| 58 | 1  | 0 | -5.828682 | 0.712473  | -1.746790 |
| 59 | 1  | 0 | -7.014748 | 0.622656  | 0.431734  |
| 60 | 1  | 0 | -5.713335 | 0.565727  | 2.545343  |
| 61 | 1  | 0 | -3.242685 | 0.603264  | 2.487115  |
| 62 | 35 | 0 | -1.229227 | 3.026271  | 0.657513  |

---

## **Cu<sup>3+</sup>(PPh<sub>2</sub>OH)(PPh<sub>2</sub>O<sup>-</sup>)(Ph)(Br) (6)**

Standard orientation:

| Center<br>Number | Atomic<br>Number | Atomic<br>Type | Coordinates (Angstroms) |           |           |
|------------------|------------------|----------------|-------------------------|-----------|-----------|
|                  |                  |                | X                       | Y         | Z         |
| 1                | 15               | 0              | 1.340868                | 1.371273  | -0.306058 |
| 2                | 6                | 0              | 1.941391                | 1.747771  | 1.350824  |
| 3                | 6                | 0              | 3.168435                | 2.399088  | 1.499832  |
| 4                | 6                | 0              | 1.216219                | 1.325628  | 2.471670  |
| 5                | 6                | 0              | 3.665557                | 2.639107  | 2.777326  |
| 6                | 1                | 0              | 3.727280                | 2.713373  | 0.624314  |
| 7                | 6                | 0              | 1.723296                | 1.571806  | 3.743552  |
| 8                | 1                | 0              | 0.261091                | 0.819203  | 2.344947  |
| 9                | 6                | 0              | 2.945449                | 2.225281  | 3.895769  |
| 10               | 1                | 0              | 3.339027                | 2.409990  | 4.889960  |
| 11               | 1                | 0              | 4.617528                | 3.144800  | 2.898129  |
| 12               | 1                | 0              | 1.163835                | 1.251772  | 4.615969  |
| 13               | 15               | 0              | -1.726501               | -0.263633 | 0.631635  |
| 14               | 6                | 0              | -3.161366               | 0.542964  | -0.202697 |
| 15               | 6                | 0              | -3.892714               | 1.526973  | 0.461748  |
| 16               | 6                | 0              | -3.524364               | 0.181661  | -1.504275 |
| 17               | 6                | 0              | -4.983977               | 2.137253  | -0.158541 |
| 18               | 1                | 0              | -3.596724               | 1.834583  | 1.462889  |
| 19               | 6                | 0              | -4.605476               | 0.794508  | -2.128169 |
| 20               | 6                | 0              | -5.338168               | 1.774026  | -1.454255 |
| 21               | 1                | 0              | -5.545384               | 2.905686  | 0.364646  |
| 22               | 1                | 0              | -4.881819               | 0.511379  | -3.139705 |
| 23               | 1                | 0              | -6.181401               | 2.253499  | -1.942010 |
| 24               | 1                | 0              | -2.938043               | -0.575660 | -2.018597 |
| 25               | 6                | 0              | -0.130868               | 2.349726  | -0.644142 |
| 26               | 6                | 0              | -0.622925               | 3.287590  | 0.267699  |
| 27               | 6                | 0              | -0.730674               | 2.191688  | -1.897168 |
| 28               | 6                | 0              | -1.713292               | 4.075447  | -0.087356 |
| 29               | 1                | 0              | -0.157837               | 3.405258  | 1.241224  |
| 30               | 6                | 0              | -1.815278               | 2.987657  | -2.244168 |
| 31               | 1                | 0              | -0.364550               | 1.438643  | -2.589824 |
| 32               | 6                | 0              | -2.305751               | 3.927228  | -1.339713 |
| 33               | 1                | 0              | -2.102728               | 4.802441  | 0.617432  |
| 34               | 1                | 0              | -2.289909               | 2.860751  | -3.210970 |
| 35               | 1                | 0              | -3.163337               | 4.535821  | -1.607175 |
| 36               | 6                | 0              | -2.596059               | -1.812695 | 1.150083  |
| 37               | 6                | 0              | -2.147293               | -3.066326 | 0.730760  |
| 38               | 6                | 0              | -3.677046               | -1.738016 | 2.036912  |
| 39               | 6                | 0              | -2.776758               | -4.225930 | 1.185085  |
| 40               | 1                | 0              | -1.301211               | -3.127965 | 0.052630  |
| 41               | 6                | 0              | -4.305552               | -2.893939 | 2.487184  |
| 42               | 1                | 0              | -4.038547               | -0.766065 | 2.368514  |
| 43               | 6                | 0              | -3.855115               | -4.144408 | 2.061400  |

|    |    |   |           |           |           |
|----|----|---|-----------|-----------|-----------|
| 44 | 1  | 0 | -2.421450 | -5.196164 | 0.850107  |
| 45 | 1  | 0 | -5.147615 | -2.822525 | 3.169156  |
| 46 | 1  | 0 | -4.343238 | -5.048002 | 2.413334  |
| 47 | 29 | 0 | 1.022090  | -0.831469 | -0.628122 |
| 48 | 8  | 0 | -0.839566 | -0.756027 | -0.623407 |
| 49 | 8  | 0 | 2.378046  | 2.046345  | -1.352509 |
| 50 | 1  | 0 | 3.129653  | 1.461977  | -1.556179 |
| 51 | 6  | 0 | 2.924787  | -0.726488 | -0.690762 |
| 52 | 6  | 0 | 3.550986  | -0.688105 | -1.938618 |
| 53 | 6  | 0 | 4.943914  | -0.721361 | -2.009529 |
| 54 | 6  | 0 | 5.703418  | -0.811924 | -0.843979 |
| 55 | 6  | 0 | 5.069903  | -0.867796 | 0.393664  |
| 56 | 6  | 0 | 3.676772  | -0.821815 | 0.475336  |
| 57 | 1  | 0 | 2.964684  | -0.645610 | -2.853407 |
| 58 | 1  | 0 | 5.430769  | -0.688637 | -2.978959 |
| 59 | 1  | 0 | 6.786198  | -0.839966 | -0.902826 |
| 60 | 1  | 0 | 5.654850  | -0.938856 | 1.305089  |
| 61 | 1  | 0 | 3.194042  | -0.850124 | 1.449347  |
| 62 | 35 | 0 | 1.198748  | -3.104963 | -1.080047 |

## TS[Cu<sup>+</sup>(PPh<sub>2</sub>OH)(PPh<sub>2</sub>O<sup>-</sup>)(Ph)(Br) (TS6,7)

Standard orientation:

| Center<br>Number | Atomic<br>Number | Atomic<br>Type | Coordinates (Angstroms) |           |           |
|------------------|------------------|----------------|-------------------------|-----------|-----------|
|                  |                  |                | X                       | Y         | Z         |
| 1                | 15               | 0              | 2.168349                | -0.079250 | -0.782318 |
| 2                | 6                | 0              | 3.404562                | -0.111113 | 0.537546  |
| 3                | 6                | 0              | 4.743843                | -0.383015 | 0.247006  |
| 4                | 6                | 0              | 2.996813                | 0.122942  | 1.857551  |
| 5                | 6                | 0              | 5.678769                | -0.407770 | 1.277896  |
| 6                | 1                | 0              | 5.042967                | -0.579232 | -0.777845 |
| 7                | 6                | 0              | 3.941795                | 0.104508  | 2.879297  |
| 8                | 1                | 0              | 1.949899                | 0.324622  | 2.077858  |
| 9                | 6                | 0              | 5.279409                | -0.160737 | 2.589849  |
| 10               | 1                | 0              | 6.011773                | -0.179973 | 3.390455  |
| 11               | 1                | 0              | 6.719495                | -0.620218 | 1.056625  |
| 12               | 1                | 0              | 3.632897                | 0.292080  | 3.902254  |
| 13               | 15               | 0              | -1.812678               | 0.183682  | 1.218993  |
| 14               | 6                | 0              | -2.041520               | 2.022436  | 1.492228  |
| 15               | 6                | 0              | -3.016320               | 2.477369  | 2.380775  |
| 16               | 6                | 0              | -1.248196               | 2.958567  | 0.817113  |
| 17               | 6                | 0              | -3.209578               | 3.844547  | 2.585882  |
| 18               | 1                | 0              | -3.628290               | 1.758267  | 2.922131  |
| 19               | 6                | 0              | -1.429830               | 4.321015  | 1.027840  |
| 20               | 6                | 0              | -2.415114               | 4.767045  | 1.911298  |
| 21               | 1                | 0              | -3.972756               | 4.188060  | 3.277753  |

|    |    |   |           |           |           |
|----|----|---|-----------|-----------|-----------|
| 22 | 1  | 0 | -0.807187 | 5.036646  | 0.497307  |
| 23 | 1  | 0 | -2.559519 | 5.830759  | 2.073805  |
| 24 | 1  | 0 | -0.482771 | 2.609829  | 0.126912  |
| 25 | 6  | 0 | 1.921328  | 1.652751  | -1.236352 |
| 26 | 6  | 0 | 1.298085  | 1.915659  | -2.462752 |
| 27 | 6  | 0 | 2.217666  | 2.700757  | -0.362396 |
| 28 | 6  | 0 | 0.968739  | 3.221081  | -2.808462 |
| 29 | 1  | 0 | 1.073887  | 1.095204  | -3.141084 |
| 30 | 6  | 0 | 1.888659  | 4.007510  | -0.716482 |
| 31 | 1  | 0 | 2.701543  | 2.502936  | 0.589075  |
| 32 | 6  | 0 | 1.259890  | 4.266888  | -1.931942 |
| 33 | 1  | 0 | 0.483796  | 3.422151  | -3.757818 |
| 34 | 1  | 0 | 2.120174  | 4.822583  | -0.038626 |
| 35 | 1  | 0 | 0.998430  | 5.285564  | -2.199615 |
| 36 | 6  | 0 | -2.554514 | 0.215508  | -0.479360 |
| 37 | 6  | 0 | -1.784526 | 0.411668  | -1.625997 |
| 38 | 6  | 0 | -3.922938 | -0.033569 | -0.618401 |
| 39 | 6  | 0 | -2.358103 | 0.331721  | -2.894235 |
| 40 | 1  | 0 | -0.730202 | 0.661594  | -1.529913 |
| 41 | 6  | 0 | -4.504461 | -0.094836 | -1.881608 |
| 42 | 1  | 0 | -4.532037 | -0.201632 | 0.268241  |
| 43 | 6  | 0 | -3.720428 | 0.075188  | -3.023087 |
| 44 | 1  | 0 | -1.742856 | 0.478873  | -3.777285 |
| 45 | 1  | 0 | -5.567512 | -0.292146 | -1.978698 |
| 46 | 1  | 0 | -4.171774 | 0.008115  | -4.007638 |
| 47 | 29 | 0 | 0.198936  | -1.180551 | -0.092938 |
| 48 | 8  | 0 | -0.192371 | 0.245491  | 0.940347  |
| 49 | 8  | 0 | 2.895510  | -0.722131 | -2.088207 |
| 50 | 1  | 0 | 2.465813  | -1.574509 | -2.297196 |
| 51 | 6  | 0 | -1.215119 | -1.990052 | 0.946856  |
| 52 | 6  | 0 | -2.255412 | -2.698013 | 0.341642  |
| 53 | 6  | 0 | -2.911509 | -3.691736 | 1.063015  |
| 54 | 6  | 0 | -2.475654 | -4.044220 | 2.339151  |
| 55 | 6  | 0 | -1.357261 | -3.416288 | 2.886310  |
| 56 | 6  | 0 | -0.705311 | -2.410324 | 2.180138  |
| 57 | 1  | 0 | -2.584266 | -2.445960 | -0.661215 |
| 58 | 1  | 0 | -3.751131 | -4.210174 | 0.610192  |
| 59 | 1  | 0 | -2.986791 | -4.825326 | 2.892037  |
| 60 | 1  | 0 | -0.990749 | -3.708254 | 3.865464  |
| 61 | 1  | 0 | 0.138930  | -1.891357 | 2.627669  |
| 62 | 35 | 0 | 0.502752  | -2.890252 | -1.617281 |

---

## **Cu<sup>+</sup>(PPh<sub>2</sub>OH)(Br)(Ph)(PPh<sub>2</sub>O) (7)**

Standard orientation:

| Center<br>Number | Atomic<br>Number | Atomic<br>Type | Coordinates (Angstroms) |           |           |
|------------------|------------------|----------------|-------------------------|-----------|-----------|
|                  |                  |                | X                       | Y         | Z         |
| 1                | 15               | 0              | -2.409973               | 0.158347  | -0.067351 |
| 2                | 6                | 0              | -3.062881               | 1.846502  | 0.012284  |
| 3                | 6                | 0              | -4.408005               | 2.119206  | -0.251787 |
| 4                | 6                | 0              | -2.179321               | 2.892987  | 0.305717  |
| 5                | 6                | 0              | -4.868548               | 3.432536  | -0.213799 |
| 6                | 1                | 0              | -5.081476               | 1.303836  | -0.494817 |
| 7                | 6                | 0              | -2.651483               | 4.202565  | 0.352622  |
| 8                | 1                | 0              | -1.130677               | 2.673328  | 0.499358  |
| 9                | 6                | 0              | -3.993339               | 4.473166  | 0.091990  |
| 10               | 1                | 0              | -4.356448               | 5.495539  | 0.121476  |
| 11               | 1                | 0              | -5.912419               | 3.643902  | -0.422888 |
| 12               | 1                | 0              | -1.968671               | 5.013594  | 0.584926  |
| 13               | 15               | 0              | 1.759771                | 0.581600  | 0.356764  |
| 14               | 6                | 0              | 3.266344                | 1.582828  | 0.429333  |
| 15               | 6                | 0              | 4.311112                | 1.438098  | -0.488780 |
| 16               | 6                | 0              | 3.366300                | 2.518229  | 1.463526  |
| 17               | 6                | 0              | 5.459067                | 2.213921  | -0.358887 |
| 18               | 1                | 0              | 4.228709                | 0.731174  | -1.310002 |
| 19               | 6                | 0              | 4.514220                | 3.295757  | 1.585096  |
| 20               | 6                | 0              | 5.560323                | 3.140020  | 0.677541  |
| 21               | 1                | 0              | 6.269176                | 2.101663  | -1.071537 |
| 22               | 1                | 0              | 4.591819                | 4.024734  | 2.384853  |
| 23               | 1                | 0              | 6.454741                | 3.747172  | 0.773053  |
| 24               | 1                | 0              | 2.539204                | 2.638069  | 2.156957  |
| 25               | 6                | 0              | -2.341931               | -0.441580 | 1.648804  |
| 26               | 6                | 0              | -1.900682               | 0.353376  | 2.708742  |
| 27               | 6                | 0              | -2.567129               | -1.808319 | 1.850490  |
| 28               | 6                | 0              | -1.694472               | -0.215547 | 3.963095  |
| 29               | 1                | 0              | -1.701544               | 1.408522  | 2.549851  |
| 30               | 6                | 0              | -2.362124               | -2.371804 | 3.106988  |
| 31               | 1                | 0              | -2.890081               | -2.427881 | 1.018440  |
| 32               | 6                | 0              | -1.920115               | -1.576366 | 4.162940  |
| 33               | 1                | 0              | -1.352980               | 0.404401  | 4.785765  |
| 34               | 1                | 0              | -2.541773               | -3.431474 | 3.259690  |
| 35               | 1                | 0              | -1.753274               | -2.016448 | 5.140931  |
| 36               | 6                | 0              | 2.116072                | -1.015797 | 1.124724  |
| 37               | 6                | 0              | 1.026247                | -1.729391 | 1.634196  |
| 38               | 6                | 0              | 3.399849                | -1.565851 | 1.175368  |
| 39               | 6                | 0              | 1.218636                | -2.998816 | 2.170740  |
| 40               | 1                | 0              | 0.036108                | -1.281751 | 1.628405  |
| 41               | 6                | 0              | 3.586346                | -2.836236 | 1.714378  |
| 42               | 1                | 0              | 4.253539                | -1.006432 | 0.801819  |
| 43               | 6                | 0              | 2.496836                | -3.552676 | 2.206442  |

|    |    |   |           |           |           |
|----|----|---|-----------|-----------|-----------|
| 44 | 1  | 0 | 0.367754  | -3.546557 | 2.563355  |
| 45 | 1  | 0 | 4.582552  | -3.263942 | 1.755158  |
| 46 | 1  | 0 | 2.646370  | -4.542348 | 2.625837  |
| 47 | 29 | 0 | -0.592481 | -0.482744 | -1.295351 |
| 48 | 8  | 0 | 0.559347  | 1.267740  | 0.951775  |
| 49 | 8  | 0 | -3.696360 | -0.671931 | -0.676056 |
| 50 | 1  | 0 | -3.353270 | -1.383877 | -1.247225 |
| 51 | 6  | 0 | 1.493199  | 0.208388  | -1.407299 |
| 52 | 6  | 0 | 0.642936  | 1.076602  | -2.127441 |
| 53 | 6  | 0 | 0.449989  | 0.863312  | -3.500373 |
| 54 | 6  | 0 | 1.128125  | -0.162023 | -4.153461 |
| 55 | 6  | 0 | 1.994268  | -1.000830 | -3.448248 |
| 56 | 6  | 0 | 2.159942  | -0.832536 | -2.079737 |
| 57 | 1  | 0 | 0.204779  | 1.943197  | -1.638175 |
| 58 | 1  | 0 | -0.213821 | 1.518464  | -4.054186 |
| 59 | 1  | 0 | 0.978661  | -0.311418 | -5.217400 |
| 60 | 1  | 0 | 2.512126  | -1.804233 | -3.959786 |
| 61 | 1  | 0 | 2.789732  | -1.517034 | -1.517861 |
| 62 | 35 | 0 | -1.245899 | -2.665104 | -1.909400 |

## **Cu<sup>+</sup>(Ph<sub>2</sub>PO<sup>-</sup>)(NEt<sub>3</sub>) (8')**

Standard orientation:

| Center<br>Number | Atomic<br>Number | Atomic<br>Type | Coordinates (Angstroms) |           |           |
|------------------|------------------|----------------|-------------------------|-----------|-----------|
|                  |                  |                | X                       | Y         | Z         |
| 1                | 6                | 0              | 3.095682                | -1.825013 | -0.468254 |
| 2                | 6                | 0              | 4.399230                | -2.221371 | 0.217249  |
| 3                | 29               | 0              | 0.848225                | -0.417848 | -1.116352 |
| 4                | 1                | 0              | 2.389758                | -2.660790 | -0.426776 |
| 5                | 1                | 0              | 3.289294                | -1.626994 | -1.526574 |
| 6                | 1                | 0              | 4.285177                | -2.329629 | 1.298908  |
| 7                | 1                | 0              | 4.717382                | -3.188558 | -0.180022 |
| 8                | 1                | 0              | 5.199442                | -1.506591 | 0.015833  |
| 9                | 6                | 0              | 1.864043                | -0.892748 | 1.442453  |
| 10               | 1                | 0              | 1.365080                | -1.868234 | 1.425124  |
| 11               | 1                | 0              | 2.704990                | -0.974386 | 2.140914  |
| 12               | 6                | 0              | 0.884439                | 0.170430  | 1.917347  |
| 13               | 1                | 0              | 1.319081                | 1.174025  | 1.904025  |
| 14               | 1                | 0              | -0.010517               | 0.188299  | 1.289695  |
| 15               | 1                | 0              | 0.576914                | -0.051712 | 2.941861  |
| 16               | 6                | 0              | 3.144991                | 0.626485  | -0.035419 |
| 17               | 1                | 0              | 3.669054                | 0.587181  | -0.995633 |
| 18               | 1                | 0              | 2.424831                | 1.447386  | -0.106105 |
| 19               | 6                | 0              | 4.122542                | 0.946051  | 1.093590  |
| 20               | 1                | 0              | 4.857514                | 0.159326  | 1.265051  |
| 21               | 1                | 0              | 4.663020                | 1.857399  | 0.825775  |



|    |    |   |           |           |           |
|----|----|---|-----------|-----------|-----------|
| 22 | 1  | 0 | 3.603805  | 1.138931  | 2.035912  |
| 23 | 7  | 0 | 2.363994  | -0.642508 | 0.068094  |
| 24 | 15 | 0 | -1.953701 | 0.360825  | -1.720039 |
| 25 | 6  | 0 | -1.370456 | 1.688904  | -0.547836 |
| 26 | 6  | 0 | -0.156889 | 2.333240  | -0.814775 |
| 27 | 6  | 0 | -2.108029 | 2.094453  | 0.569416  |
| 28 | 6  | 0 | 0.317361  | 3.343957  | 0.021083  |
| 29 | 1  | 0 | 0.421696  | 2.034613  | -1.685907 |
| 30 | 6  | 0 | -1.630982 | 3.093373  | 1.414166  |
| 31 | 1  | 0 | -3.051632 | 1.605664  | 0.799795  |
| 32 | 6  | 0 | -0.414649 | 3.720223  | 1.144796  |
| 33 | 1  | 0 | 1.259931  | 3.835446  | -0.204617 |
| 34 | 1  | 0 | -2.206949 | 3.380099  | 2.288876  |
| 35 | 1  | 0 | -0.044045 | 4.499057  | 1.803647  |
| 36 | 6  | 0 | -2.502307 | -0.847784 | -0.415718 |
| 37 | 6  | 0 | -3.844378 | -0.871170 | -0.025348 |
| 38 | 6  | 0 | -1.616619 | -1.745301 | 0.184187  |
| 39 | 6  | 0 | -4.282541 | -1.747698 | 0.966665  |
| 40 | 1  | 0 | -4.554756 | -0.198996 | -0.503141 |
| 41 | 6  | 0 | -2.048779 | -2.631059 | 1.165660  |
| 42 | 1  | 0 | -0.573627 | -1.739777 | -0.126663 |
| 43 | 6  | 0 | -3.385129 | -2.630047 | 1.563871  |
| 44 | 1  | 0 | -5.326498 | -1.749761 | 1.265099  |
| 45 | 1  | 0 | -1.345311 | -3.322459 | 1.620749  |
| 46 | 1  | 0 | -3.726878 | -3.319874 | 2.329001  |
| 47 | 8  | 0 | -0.569112 | -0.224555 | -2.269436 |

---

## **Cu<sup>+</sup>(Ph<sub>2</sub>PO<sup>-</sup>)(NEt<sub>3</sub>)----PhBr (10)**

Standard orientation:

| Center<br>Number | Atomic<br>Number | Atomic<br>Type | Coordinates (Angstroms) |           |           |
|------------------|------------------|----------------|-------------------------|-----------|-----------|
|                  |                  |                | X                       | Y         | Z         |
| 1                | 6                | 0              | -3.155456               | 0.514914  | -1.829596 |
| 2                | 6                | 0              | -4.165230               | 1.492024  | -2.427115 |
| 3                | 29               | 0              | -0.713269               | -0.319621 | -0.497058 |
| 4                | 1                | 0              | -2.844589               | -0.204071 | -2.594695 |
| 5                | 1                | 0              | -3.639673               | -0.054971 | -1.033121 |
| 6                | 1                | 0              | -3.710447               | 2.166028  | -3.157603 |
| 7                | 1                | 0              | -4.939971               | 0.919549  | -2.943797 |
| 8                | 1                | 0              | -4.659772               | 2.089228  | -1.658064 |
| 9                | 6                | 0              | -1.100737               | 1.730440  | -2.325347 |
| 10               | 1                | 0              | -1.121194               | 1.062201  | -3.192478 |
| 11               | 1                | 0              | -1.569509               | 2.672721  | -2.634089 |
| 12               | 6                | 0              | 0.338076                | 1.966118  | -1.897818 |
| 13               | 1                | 0              | 0.400057                | 2.554037  | -0.976485 |
| 14               | 1                | 0              | 0.846313                | 1.014686  | -1.718695 |
| 15               | 1                | 0              | 0.874251                | 2.510653  | -2.679126 |
| 16               | 6                | 0              | -2.130533               | 1.947763  | -0.076394 |
| 17               | 1                | 0              | -2.918031               | 1.462809  | 0.510940  |
| 18               | 1                | 0              | -1.223137               | 1.917967  | 0.535036  |
| 19               | 6                | 0              | -2.454646               | 3.419487  | -0.324606 |
| 20               | 1                | 0              | -3.315544               | 3.573576  | -0.976326 |
| 21               | 1                | 0              | -2.672009               | 3.888010  | 0.639029  |
| 22               | 1                | 0              | -1.598902               | 3.946568  | -0.756380 |
| 23               | 7                | 0              | -1.905857               | 1.075355  | -1.265842 |
| 24               | 6                | 0              | -2.452334               | -1.625302 | 0.954738  |
| 25               | 6                | 0              | -3.762420               | -1.227243 | 1.198702  |
| 26               | 6                | 0              | -1.408106               | -1.301820 | 1.818603  |
| 27               | 6                | 0              | -4.023487               | -0.436896 | 2.315900  |
| 28               | 1                | 0              | -4.562051               | -1.528858 | 0.531041  |
| 29               | 6                | 0              | -1.693396               | -0.515364 | 2.935435  |
| 30               | 1                | 0              | -0.410656               | -1.694027 | 1.654327  |
| 31               | 6                | 0              | -2.990180               | -0.070363 | 3.177277  |
| 32               | 1                | 0              | -5.040715               | -0.115873 | 2.513949  |
| 33               | 1                | 0              | -0.890084               | -0.269369 | 3.622924  |
| 34               | 1                | 0              | -3.202196               | 0.540939  | 4.047801  |
| 35               | 35               | 0              | -2.067772               | -2.691622 | -0.571836 |
| 36               | 15               | 0              | 2.003650                | -0.680361 | 0.953100  |
| 37               | 6                | 0              | 2.128537                | 1.183980  | 0.897352  |
| 38               | 6                | 0              | 1.203952                | 1.893874  | 1.672894  |
| 39               | 6                | 0              | 3.019265                | 1.914165  | 0.101557  |
| 40               | 6                | 0              | 1.144200                | 3.286764  | 1.639361  |
| 41               | 1                | 0              | 0.513251                | 1.344109  | 2.311920  |
| 42               | 6                | 0              | 2.976140                | 3.306812  | 0.073336  |
| 43               | 1                | 0              | 3.750338                | 1.389235  | -0.507791 |

|    |   |   |          |           |           |
|----|---|---|----------|-----------|-----------|
| 44 | 6 | 0 | 2.035001 | 3.996667  | 0.836635  |
| 45 | 1 | 0 | 0.412259 | 3.815449  | 2.243426  |
| 46 | 1 | 0 | 3.674237 | 3.856999  | -0.550861 |
| 47 | 1 | 0 | 2.000553 | 5.081433  | 0.810445  |
| 48 | 6 | 0 | 3.648062 | -1.060837 | 0.201163  |
| 49 | 6 | 0 | 4.809791 | -0.979562 | 0.976085  |
| 50 | 6 | 0 | 3.751377 | -1.445827 | -1.136711 |
| 51 | 6 | 0 | 6.053576 | -1.265545 | 0.420853  |
| 52 | 1 | 0 | 4.739718 | -0.686855 | 2.022425  |
| 53 | 6 | 0 | 4.995196 | -1.740054 | -1.694204 |
| 54 | 1 | 0 | 2.840946 | -1.505477 | -1.726674 |
| 55 | 6 | 0 | 6.148227 | -1.648754 | -0.917309 |
| 56 | 1 | 0 | 6.949889 | -1.196882 | 1.030171  |
| 57 | 1 | 0 | 5.066171 | -2.039020 | -2.736121 |
| 58 | 1 | 0 | 7.117144 | -1.878260 | -1.350116 |
| 59 | 8 | 0 | 0.998394 | -1.061435 | -0.229053 |

---
